# Supplementary material
Source: ML conference proceedings conference paper supplement (https://openreview.net/forum?id=wKPQXtVejB)

200 samples  
mistakeness of cut: 0.33

$\text{feature\_0} \leq -0.08$

99 samples  
label:  $\omega_1$

$\text{feature\_0} > -0.08$

101 samples  
mistakeness of cut: 0.25

$\text{feature\_0} \leq 1.62$

3 samples  
label:  $\omega_1 \cup \omega_2$

$\text{feature\_0} > 1.62$

98 samples  
label:  $\omega_2$

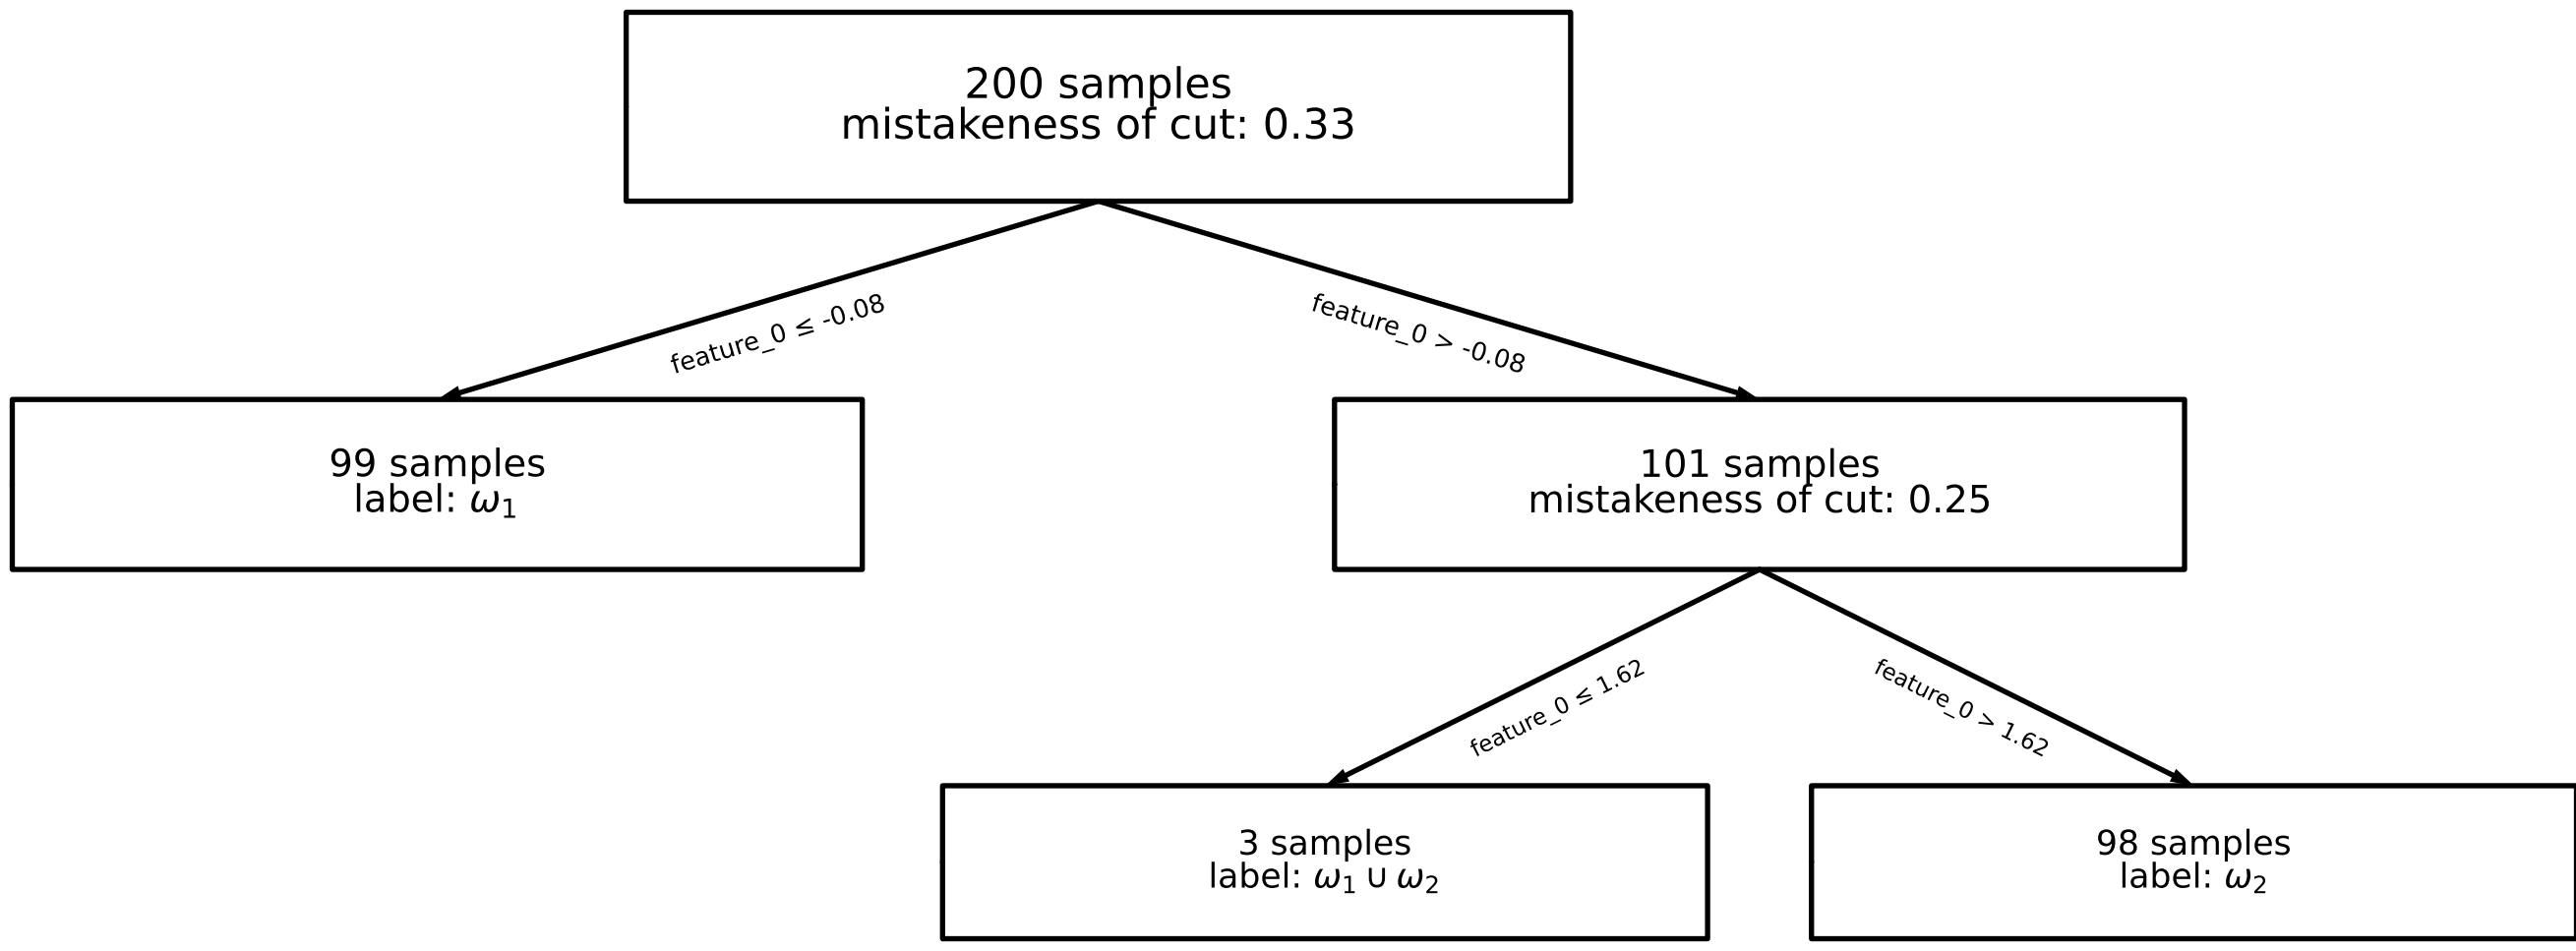

Supplement: supplementary_material [file diagram_-1.pdf › iemm/experiments/figs/Credal_Dog-2/Credal_Dog-2/diagram_-1.pdf]
