# Supplementary material
Source: ML conference proceedings conference paper supplement (https://openreview.net/forum?id=wKPQXtVejB)

442 samples  
mistakeness of cut: 0.38

$s4 \leq -0.00$

178 samples  
label:  $\omega_2$

$s4 > -0.00$

264 samples  
mistakeness of cut: 0.35

$s5 \leq 0.00$

83 samples  
label:  $\omega_1 \cup \omega_2$

$s5 > 0.00$

181 samples  
label:  $\omega_1$

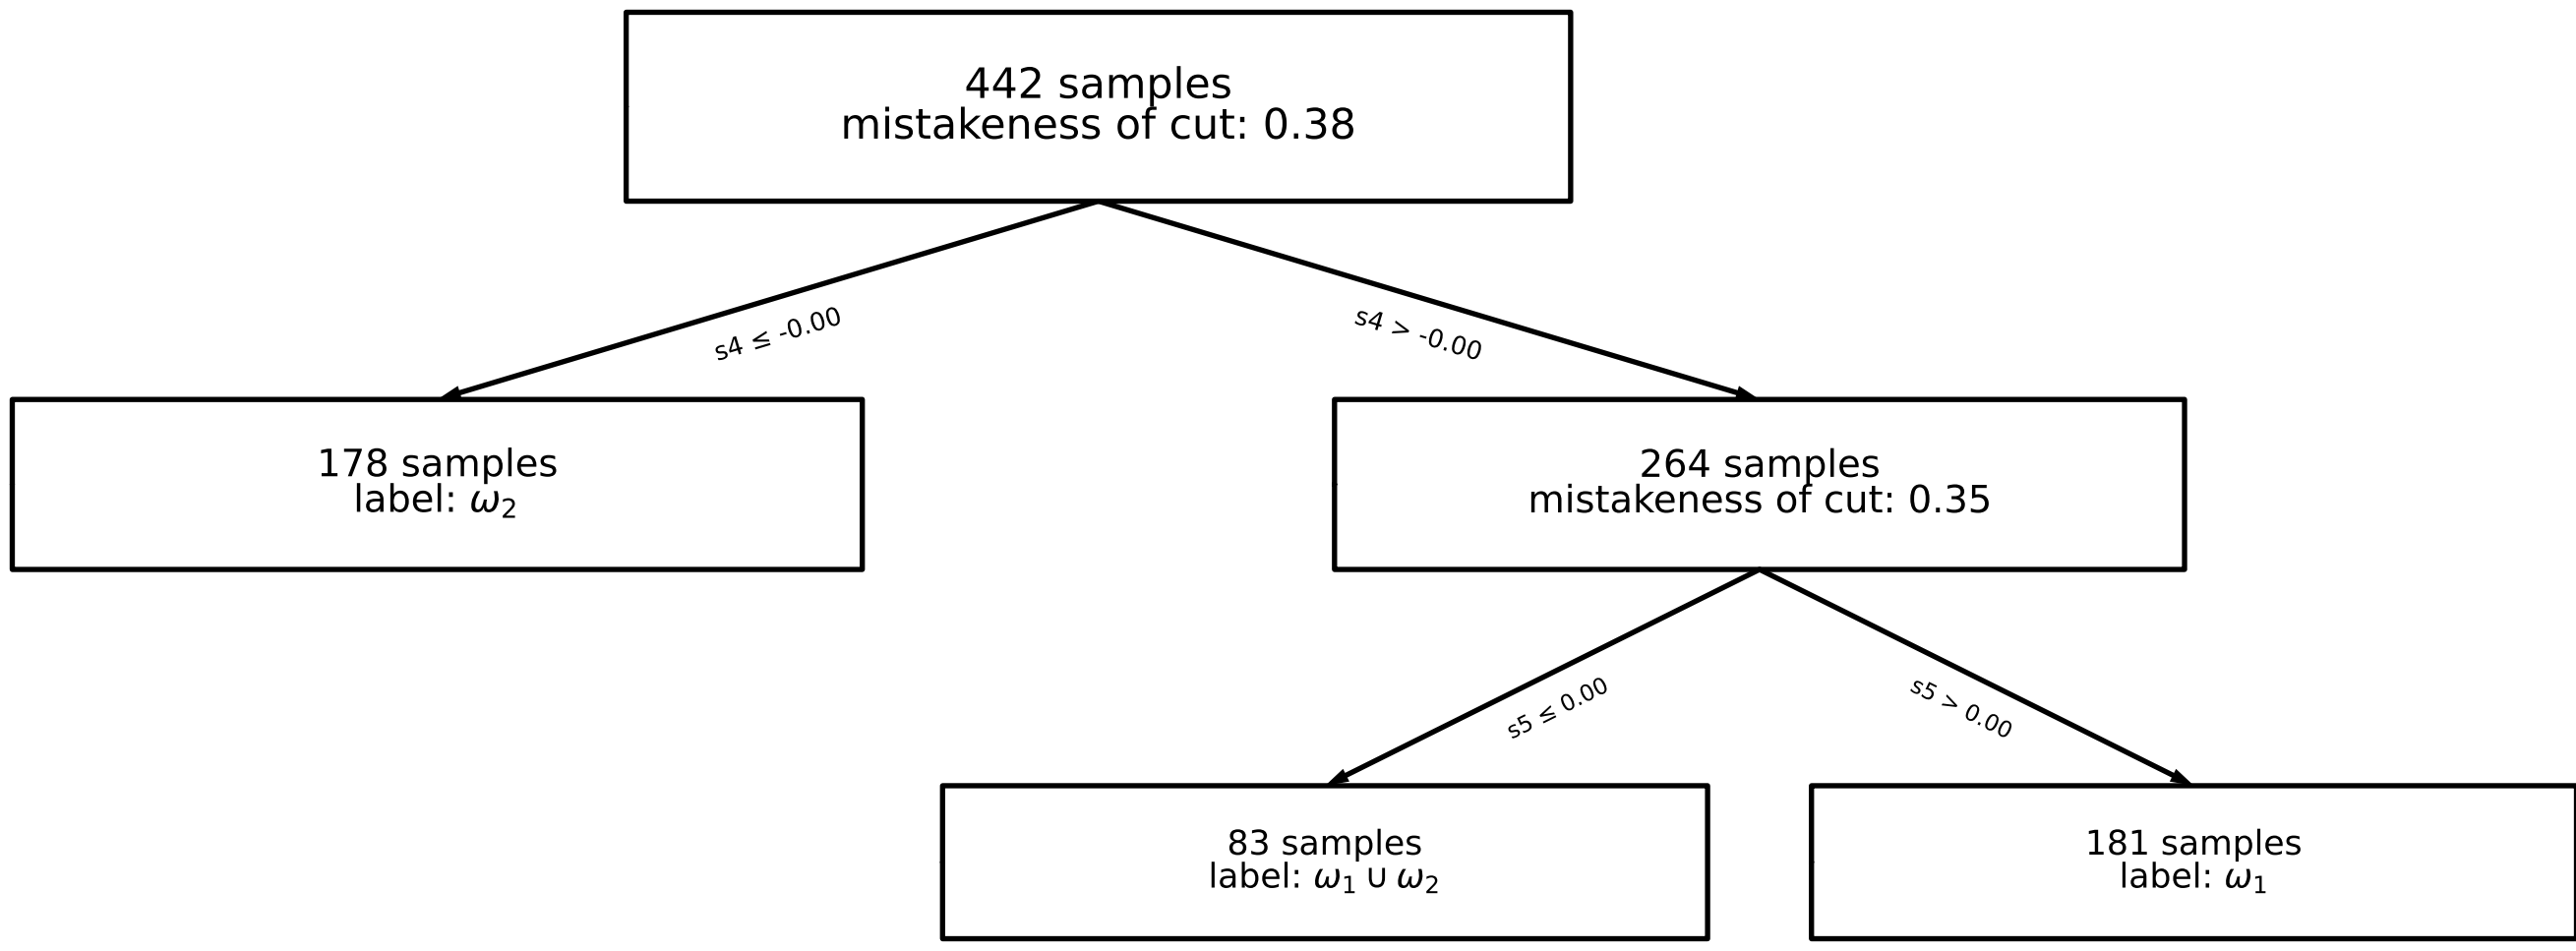

Supplement: supplementary_material [file diagram_-1.pdf › iemm/experiments/figs/datasets_evclust/diabetes/diagram_-1.pdf]
