# Supplementary material
Source: ML conference proceedings conference paper supplement (https://openreview.net/forum?id=wKPQXtVejB)

178 samples  
mistakeness of cut: 0.18

$\text{proline} \leq 722.50$

104 samples  
label:  $\omega_2$

$\text{proline} > 722.50$

74 samples  
mistakeness of cut: 0.03

$\text{proline} \leq 977.50$

28 samples  
label:  $\omega_1 \cup \omega_2$

$\text{proline} > 977.50$

46 samples  
label:  $\omega_1$

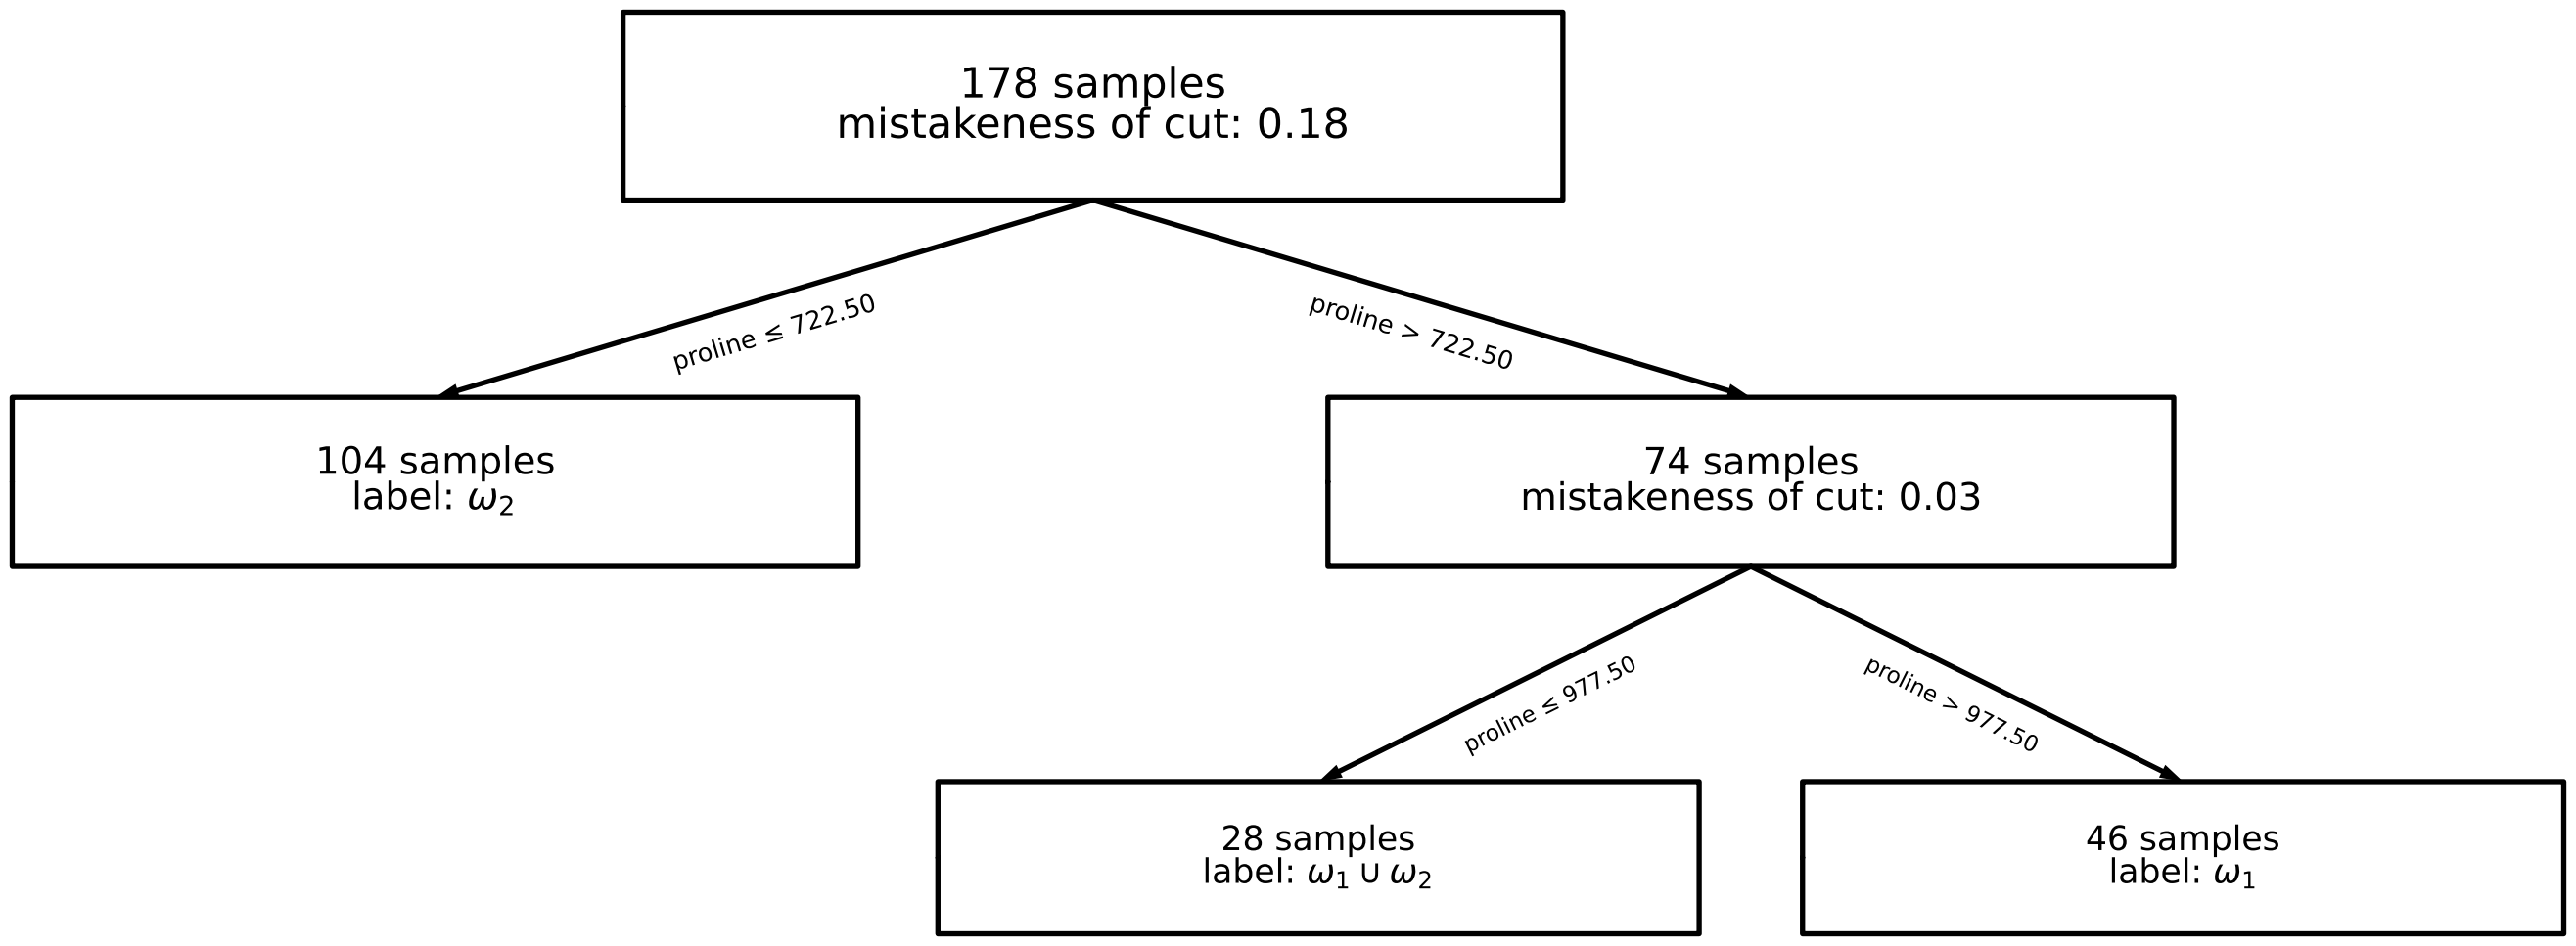

Supplement: supplementary_material [file diagram_-1.pdf › iemm/experiments/figs/datasets_evclust/wine/diagram_-1.pdf]
