# Supplementary material
Source: ML conference proceedings conference paper supplement (https://openreview.net/forum?id=wKPQXtVejB)
Supplement: supplementary_material [file diagram_-1.pdf › iemm/experiments/figs/three_clusters2D_synth/rough/diagram_-1.pdf]

300 samples  
mistakeness of cut: 0.56

198 samples  
mistakeness of cut: 0.51

102 samples  
label:  $\omega_1$

67 samples  
label:  $\omega_2$

131 samples  
mistakeness of cut: 0.44

73 samples  
mistakeness of cut: 0.5

58 samples  
label:  $\omega_3$

48 samples  
label:  $\omega_2 \cup \omega_3$

25 samples  
mistakeness of cut: 0.25

8 samples  
label:  $\omega_1 \cup \omega_2$

17 samples  
mistakeness of cut: 0.08

11 samples  
label:  $\omega_1 \cup \omega_2 \cup \omega_3$

6 samples  
label:  $\omega_1 \cup \omega_3$
