# Supplementary material
Source: ML conference proceedings conference paper supplement (https://openreview.net/forum?id=wKPQXtVejB)

40 samples  
mistakeness of cut: 0.23

$\text{feature\_0} \leq -1.88$

24 samples  
label:  $\omega_1$

$\text{feature\_0} > -1.88$

16 samples  
mistakeness of cut: 0.12

$\text{feature\_0} \leq -0.74$

1 samples  
label:  $\omega_1 \cup \omega_2$

$\text{feature\_0} > -0.74$

15 samples  
label:  $\omega_2$

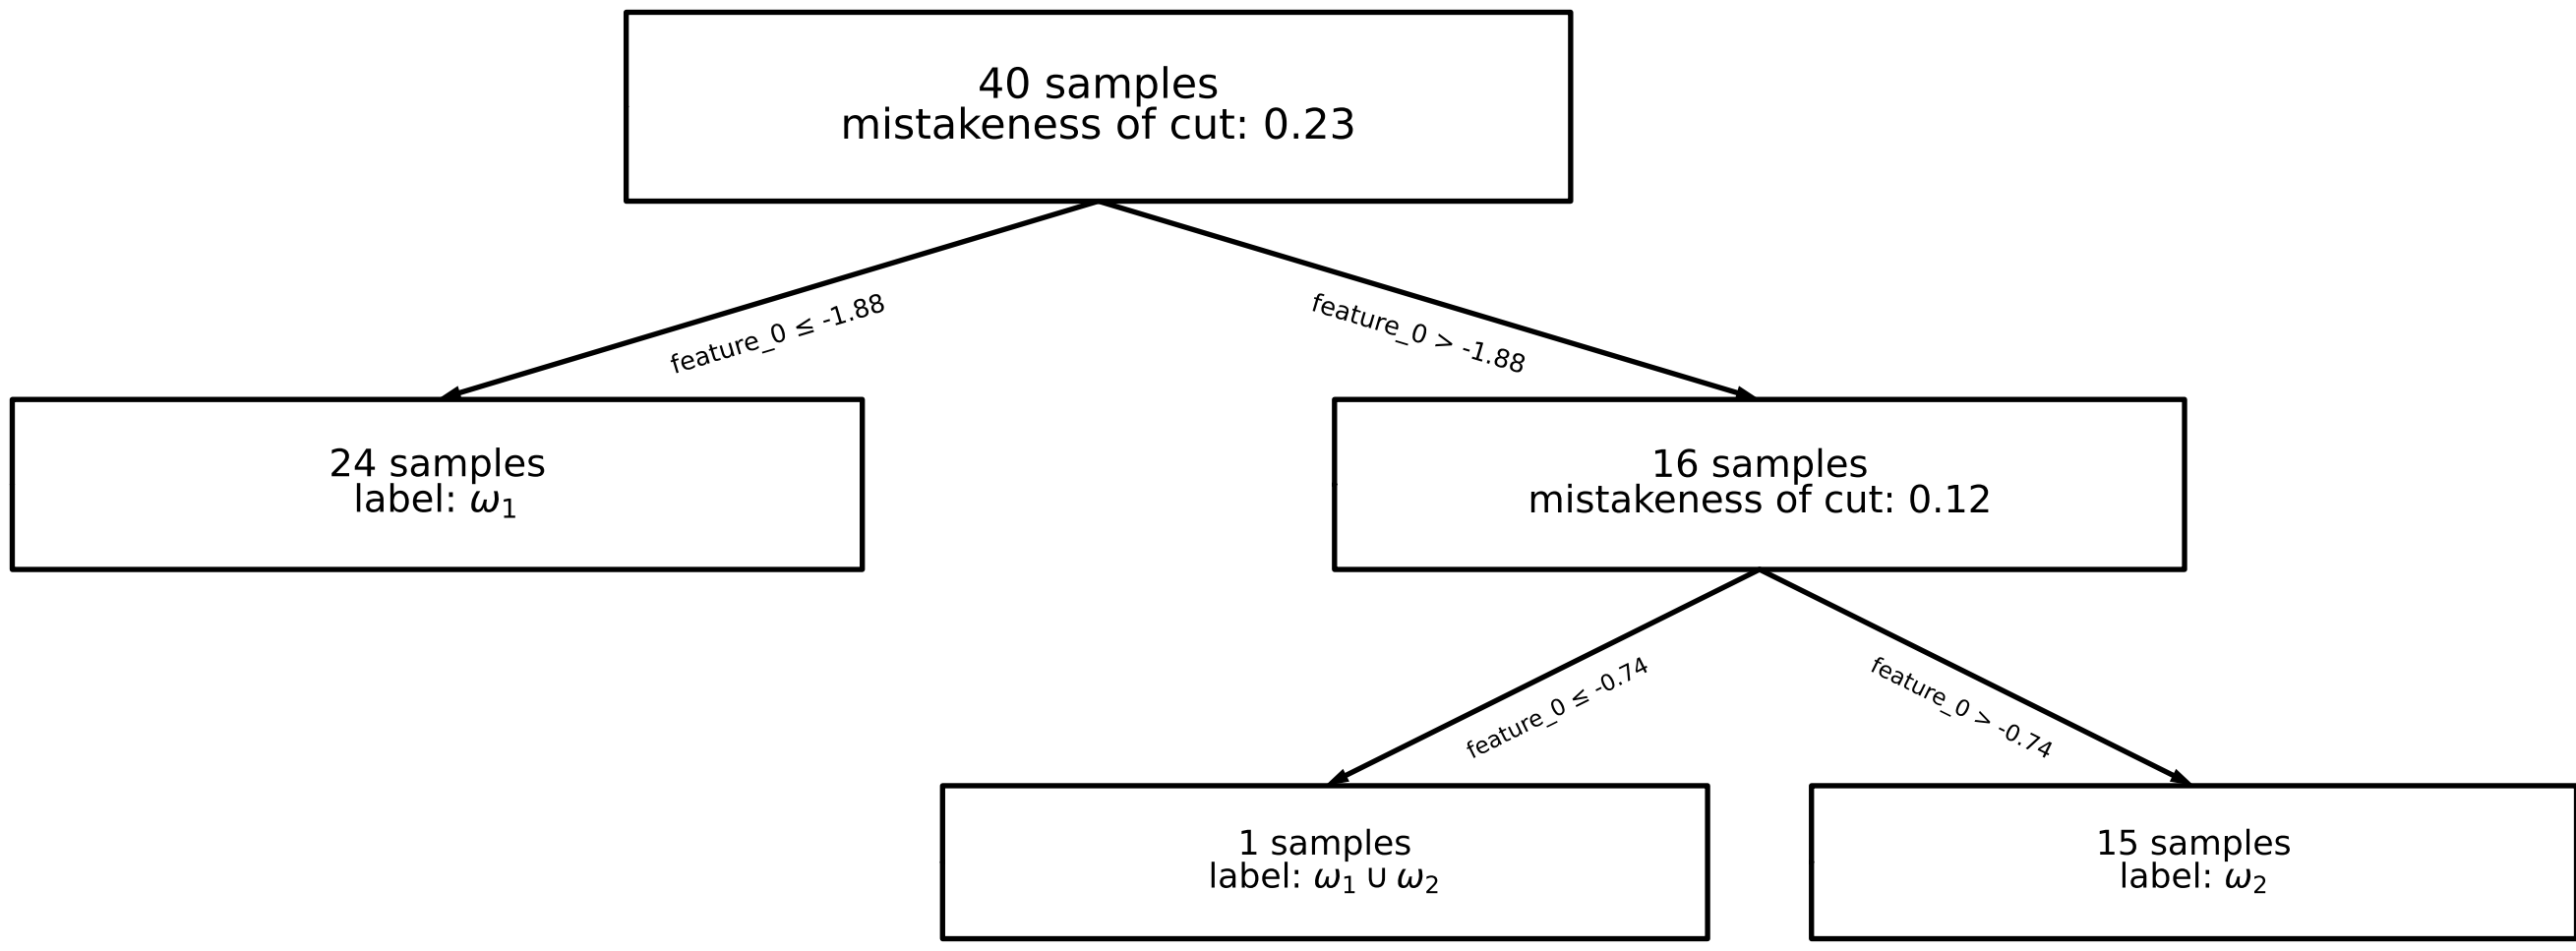

Supplement: supplementary_material [file diagram_-inf.pdf › iemm/experiments/figs/Credal_Bird-2/Credal_Bird-2/diagram_-inf.pdf]
