# Supplementary material
Source: ML conference proceedings conference paper supplement (https://openreview.net/forum?id=wKPQXtVejB)

442 samples  
mistakeness of cut: 0.25

$s_4 \leq -0.00$

287 samples  
label:  $\omega_2$

$s_4 > -0.00$

155 samples  
mistakeness of cut: 0.1

$s_4 \leq 0.00$

2 samples  
label:  $\omega_1 \cup \omega_2$

$s_4 > 0.00$

153 samples  
label:  $\omega_1$

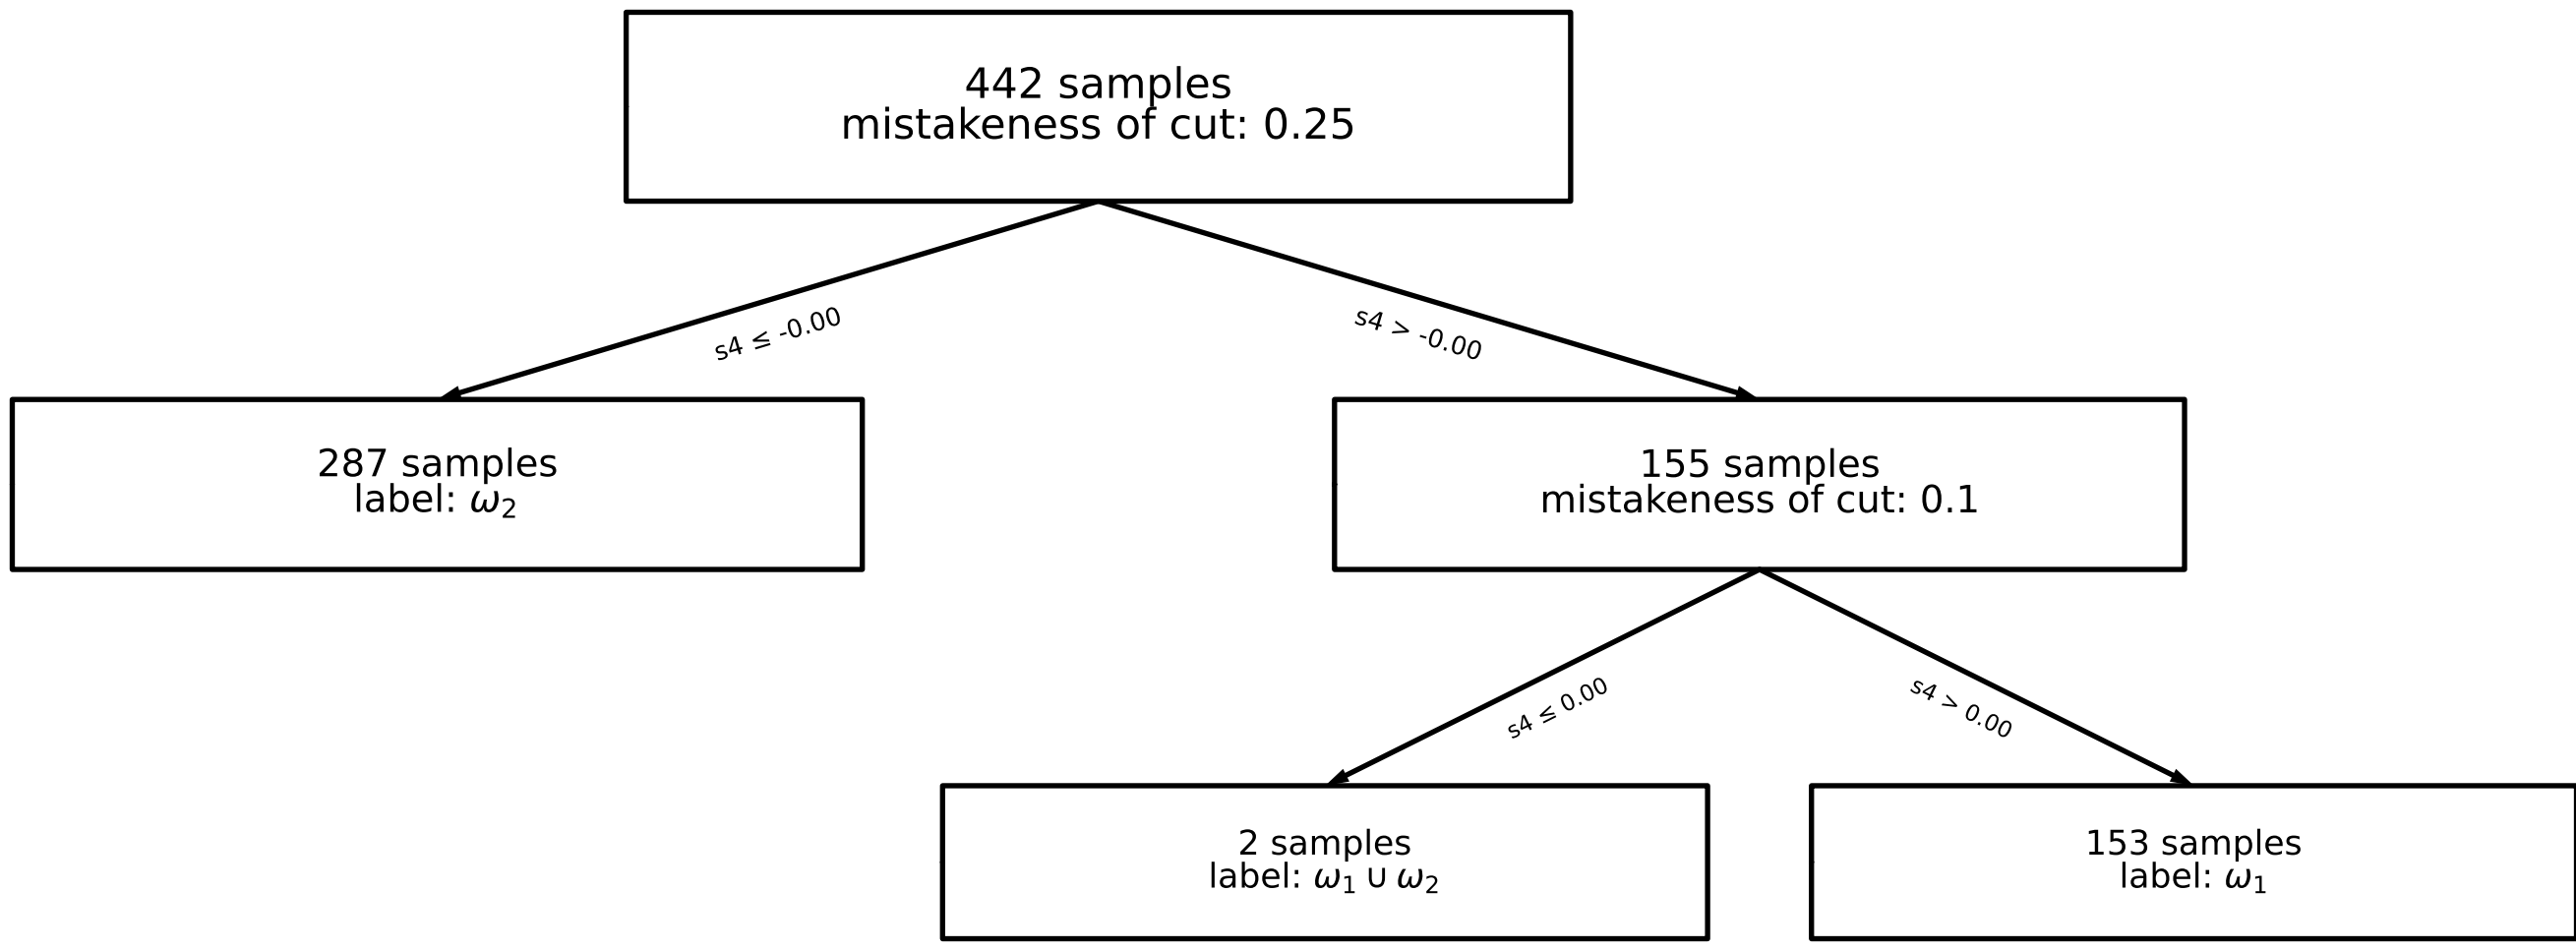

Supplement: supplementary_material [file diagram_-inf.pdf › iemm/experiments/figs/datasets_evclust/diabetes/diagram_-inf.pdf]
