# Supplementary material
Source: ML conference proceedings conference paper supplement (https://openreview.net/forum?id=wKPQXtVejB)

178 samples  
mistakeness of cut: 0.12

$\text{proline} \leq 812.50$

116 samples  
label:  $\omega_2$

$\text{proline} > 812.50$

62 samples  
mistakeness of cut: 0.0

$\text{proline} \leq 832.50$

2 samples  
label:  $\omega_1 \cup \omega_2$

$\text{proline} > 832.50$

60 samples  
label:  $\omega_1$

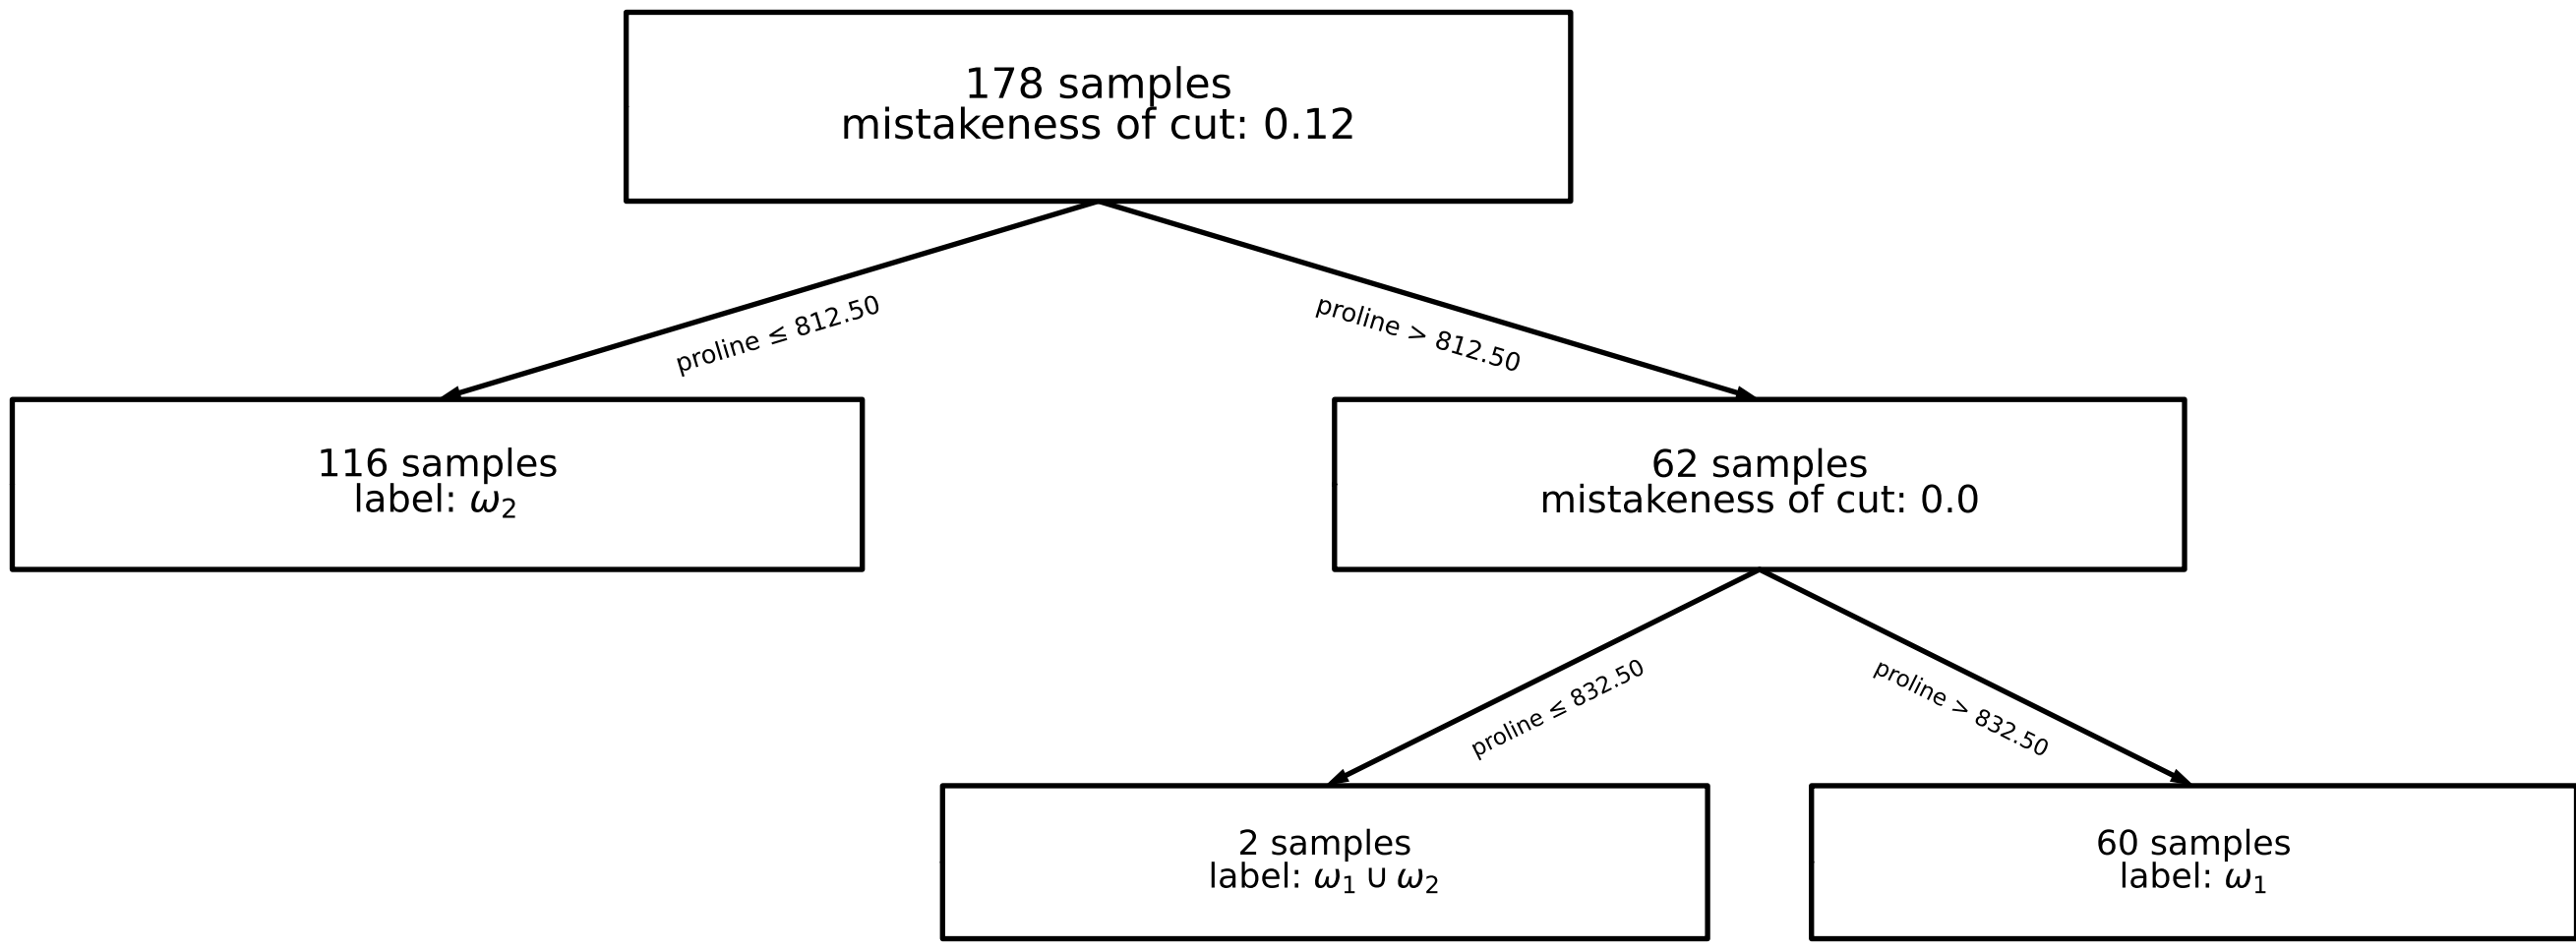

Supplement: supplementary_material [file diagram_-inf.pdf › iemm/experiments/figs/datasets_evclust/wine/diagram_-inf.pdf]
