# Supplementary material
Source: ML conference proceedings conference paper supplement (https://openreview.net/forum?id=wKPQXtVejB)

442 samples  
mistakeness of cut: 0.49

$s_4 \leq -0.02$

171 samples  
label:  $\omega_2$

$s_4 > -0.02$

271 samples  
mistakeness of cut: 0.45

$s_4 \leq 0.02$

126 samples  
label:  $\omega_1 \cup \omega_2$

$s_4 > 0.02$

145 samples  
label:  $\omega_1$

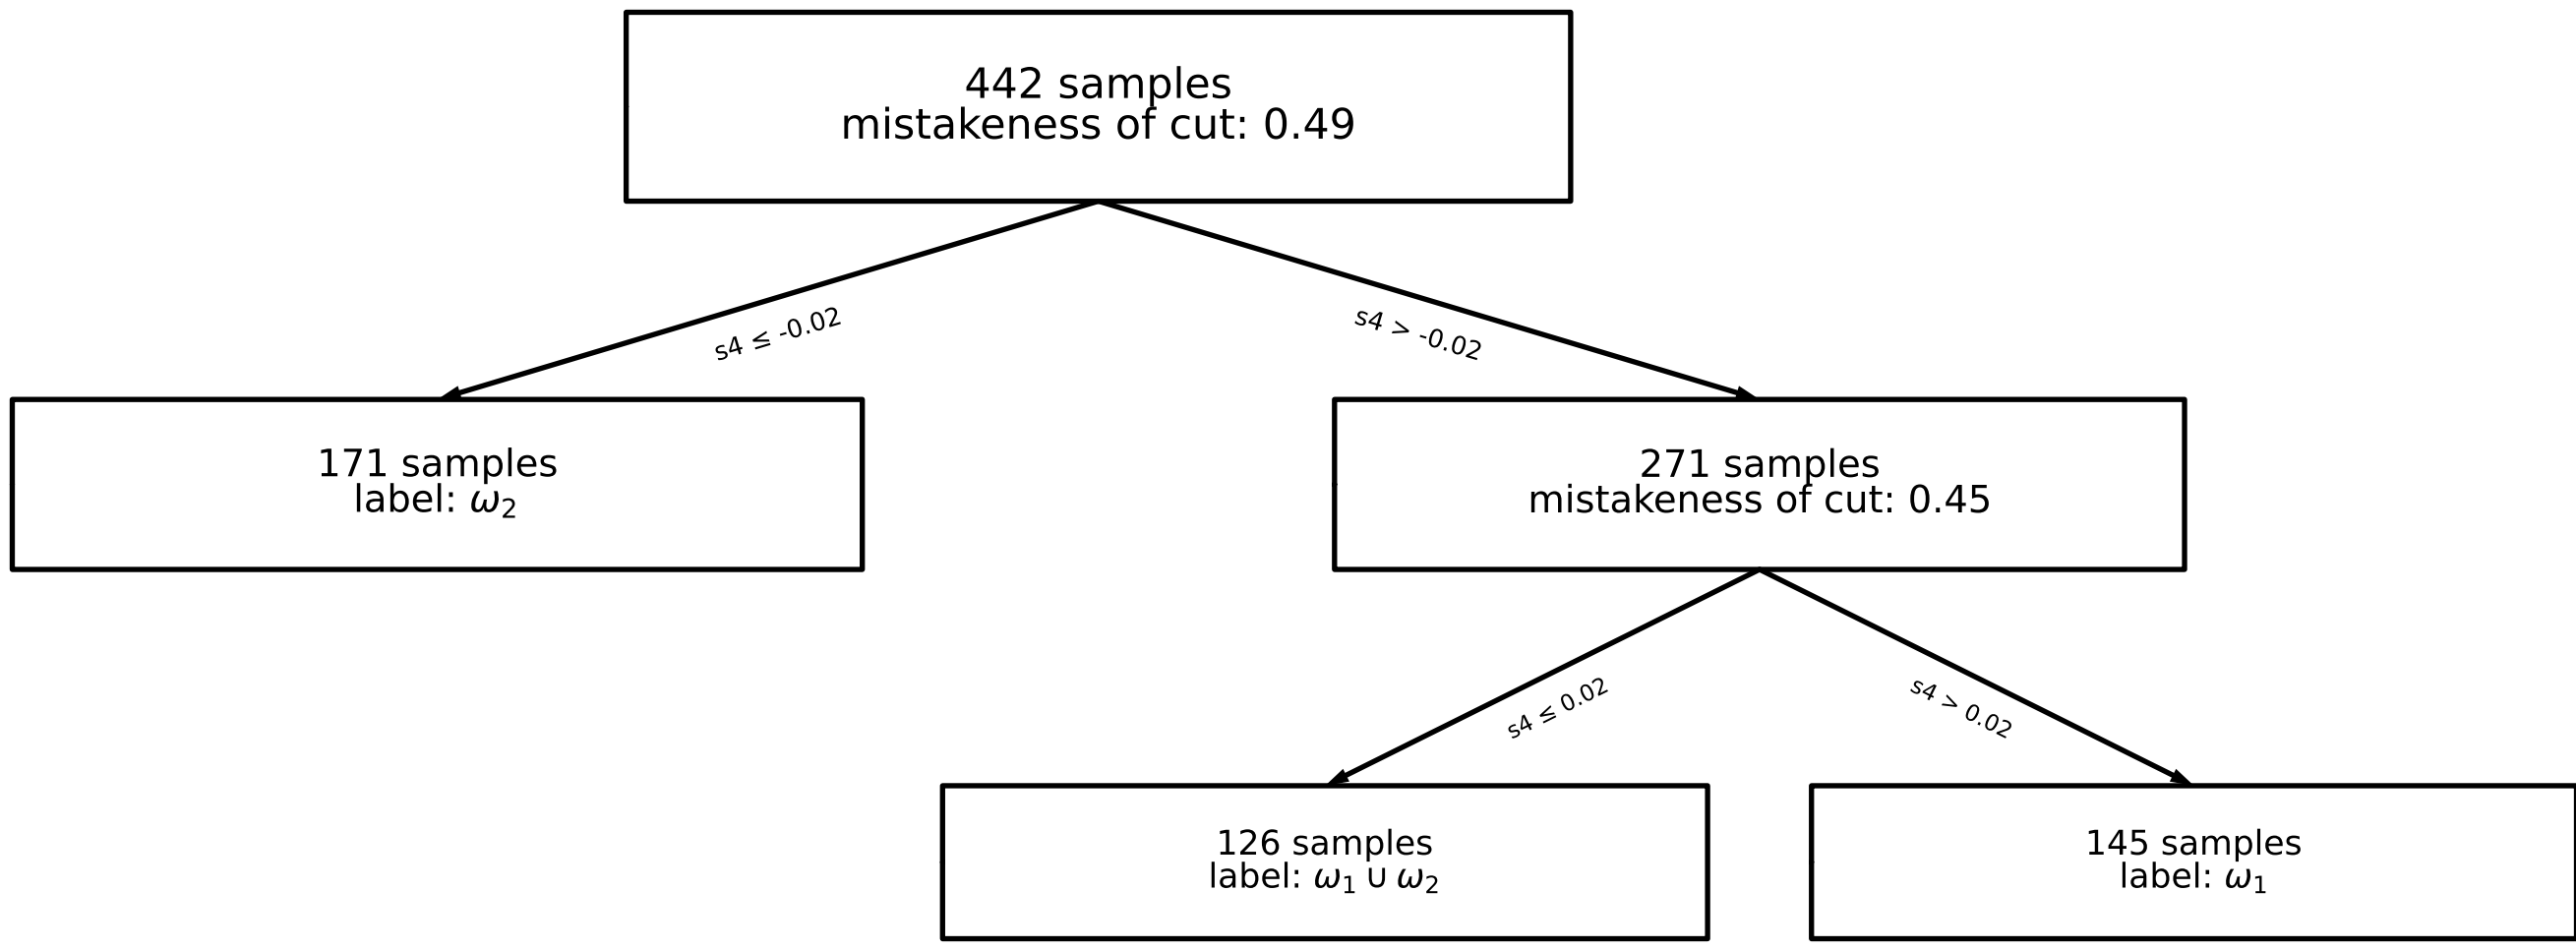

Supplement: supplementary_material [file diagram_0.pdf › iemm/experiments/figs/datasets_evclust/diabetes/diagram_0.pdf]
