# Supplementary material
Source: ML conference proceedings conference paper supplement (https://openreview.net/forum?id=wKPQXtVejB)

178 samples  
mistakeness of cut: 0.24

$\text{proline} \leq 716.00$

102 samples  
label:  $\omega_2$

$\text{proline} > 716.00$

76 samples  
mistakeness of cut: 0.05

$\text{proline} \leq 987.50$

32 samples  
label:  $\omega_1 \cup \omega_2$

$\text{proline} > 987.50$

44 samples  
label:  $\omega_1$

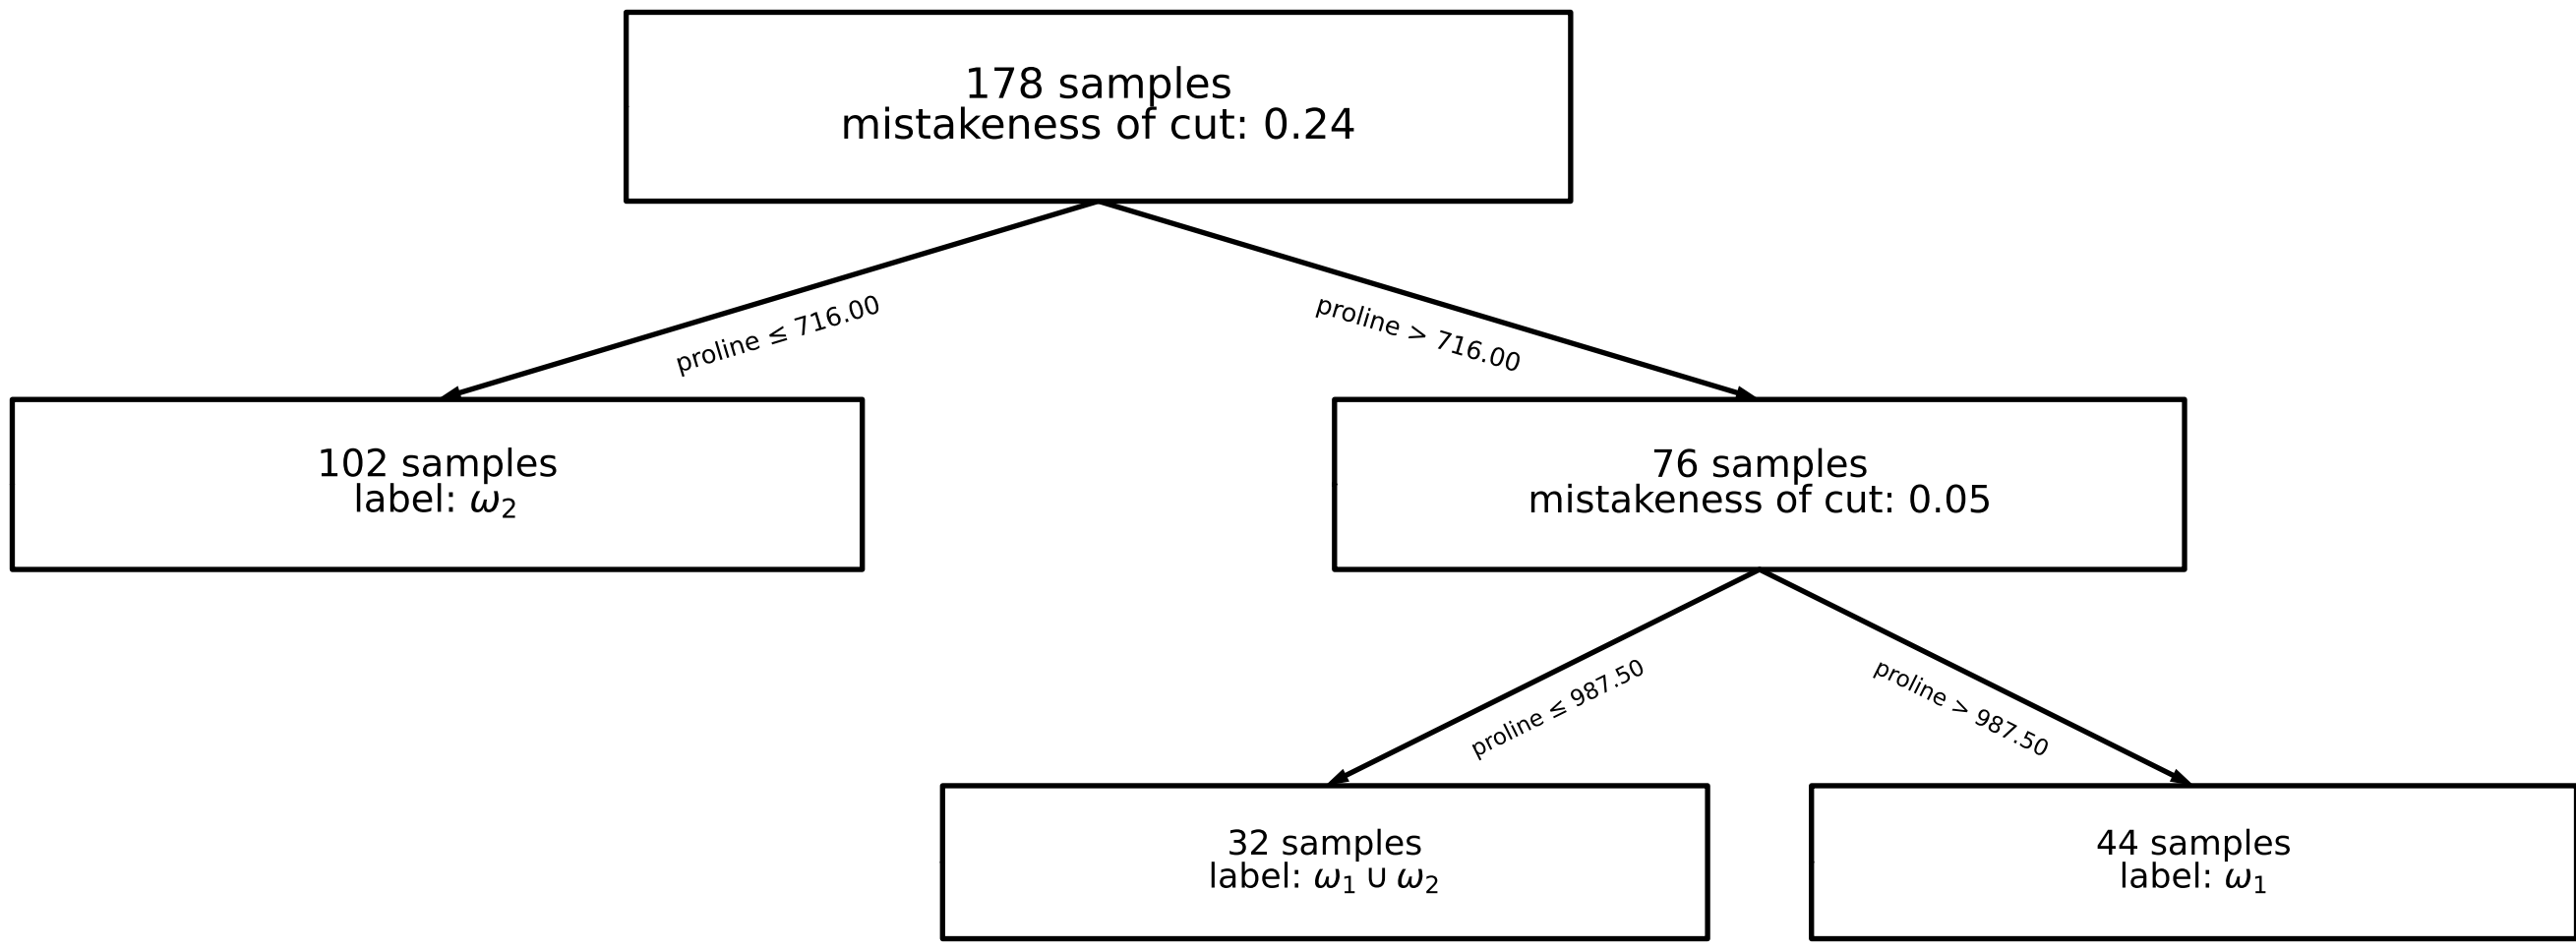

Supplement: supplementary_material [file diagram_0.pdf › iemm/experiments/figs/datasets_evclust/wine/diagram_0.pdf]
