# Supplementary material
Source: ML conference proceedings conference paper supplement (https://openreview.net/forum?id=wKPQXtVejB)
Supplement: supplementary_material [file diagram_0.pdf › iemm/experiments/figs/three_clusters2D_synth/rough/diagram_0.pdf]

300 samples  
mistakeness of cut: 0.63

215 samples  
mistakeness of cut: 0.59

85 samples  
label:  $\omega_1$

69 samples  
label:  $\omega_2$

146 samples  
mistakeness of cut: 0.53

84 samples  
mistakeness of cut: 0.59

62 samples  
label:  $\omega_3$

48 samples  
label:  $\omega_2 \cup \omega_3$

36 samples  
mistakeness of cut: 0.4

16 samples  
label:  $\omega_1 \cup \omega_2$

20 samples  
mistakeness of cut: 0.15

11 samples  
label:  $\omega_1 \cup \omega_2 \cup \omega_3$

9 samples  
label:  $\omega_1 \cup \omega_3$
