# Supplementary material
Source: ML conference proceedings conference paper supplement (https://openreview.net/forum?id=wKPQXtVejB)
Supplement: supplementary_material [file diagram_1.pdf › iemm/experiments/figs/three_clusters2D_synth/rough/diagram_1.pdf]

300 samples  
mistakeness of cut: 0.28

269 samples  
mistakeness of cut: 0.32

31 samples  
label:  $\omega_1$

231 samples  
mistakeness of cut: 0.27

38 samples  
label:  $\omega_3$

199 samples  
mistakeness of cut: 0.38

32 samples  
label:  $\omega_1 \cup \omega_3$

134 samples  
mistakeness of cut: 0.38

65 samples  
label:  $\omega_1 \cup \omega_2$

108 samples  
mistakeness of cut: 0.32

26 samples  
label:  $\omega_1 \cup \omega_2 \cup \omega_3$

65 samples  
label:  $\omega_2$

43 samples  
label:  $\omega_2 \cup \omega_3$
