# Supplementary material
Source: ML conference proceedings conference paper supplement (https://openreview.net/forum?id=wKPQXtVejB)

$\mathcal{M}_{quasi - bayesian}$  $M_{\mathcal{M}_{quasi - bayesian}}^{-\infty}$  $M_{\mathcal{M}_{quasi - bayesian}}^{-1}$  $M_{\mathcal{M}_{quasi - bayesian}}^0$  $M_{\mathcal{M}_{quasi - bayesian}}^1$  $M_{\mathcal{M}_{quasi - bayesian}}^{\infty}$  $\mathcal{M}_{full}$  $M_{\mathcal{M}_{full}}^{-\infty}$  $M_{\mathcal{M}_{full}}^{-1}$  $M_{\mathcal{M}_{full}}^0$  $M_{\mathcal{M}_{full}}^1$  $M_{\mathcal{M}_{full}}^{\infty}$ 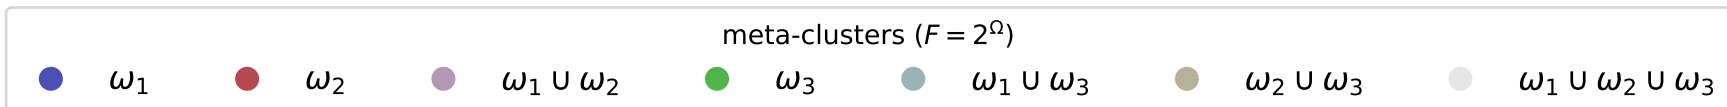

Supplement: supplementary_material [file points_plot.pdf › iemm/experiments/figs/three_clusters2D_synth/points_plot.pdf]
