# Supplementary material
Source: ML conference proceedings conference paper supplement (https://openreview.net/forum?id=wKPQXtVejB)
Supplement: supplementary_material [file points_plot.pdf › iemm/experiments/figs/two_clusters2D_synth/points_plot.pdf]

$\mathcal{M}_{\text{easy}}$  $M_{\mathcal{M}_{\text{easy}}}^{-\infty}$  $M_{\mathcal{M}_{\text{easy}}}^{-1}$  $M_{\mathcal{M}_{\text{easy}}}^0$  $M_{\mathcal{M}_{\text{easy}}}^1$  $M_{\mathcal{M}_{\text{easy}}}^{\infty}$ meta-clusters ( $F = 2^{\alpha}$ )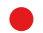 $\omega_1$ 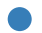 $\omega_2$ 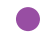 $\omega_1 \cup \omega_2$
