# Supplementary material
Source: ML conference proceedings conference paper supplement (https://openreview.net/forum?id=wKPQXtVejB)

dataset easy

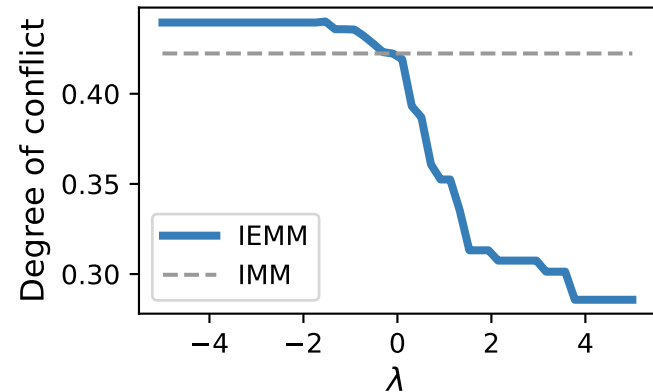

dataset easy

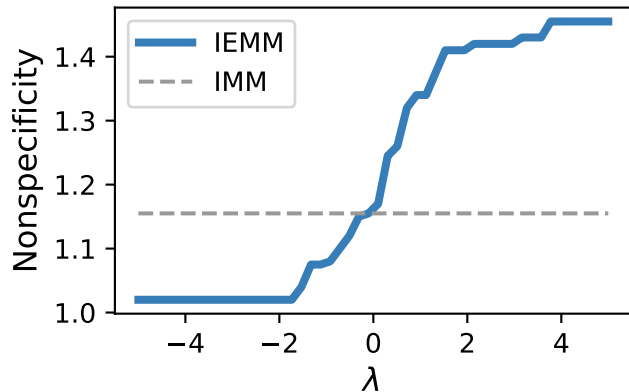

dataset quasi-bayesian

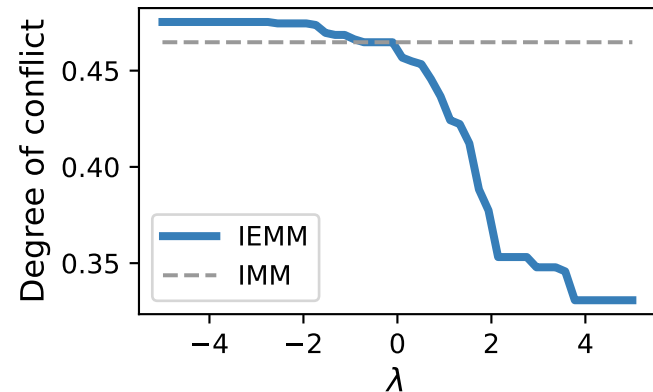

dataset quasi-bayesian

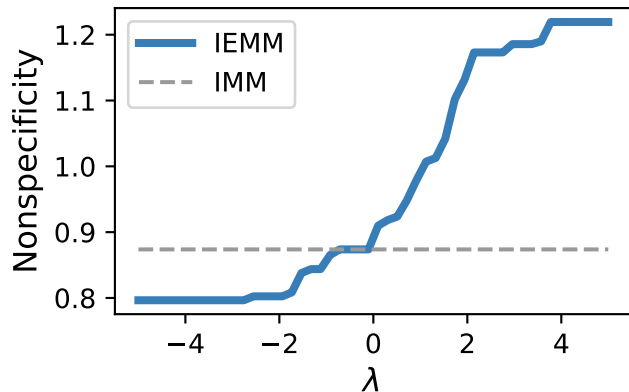

dataset full

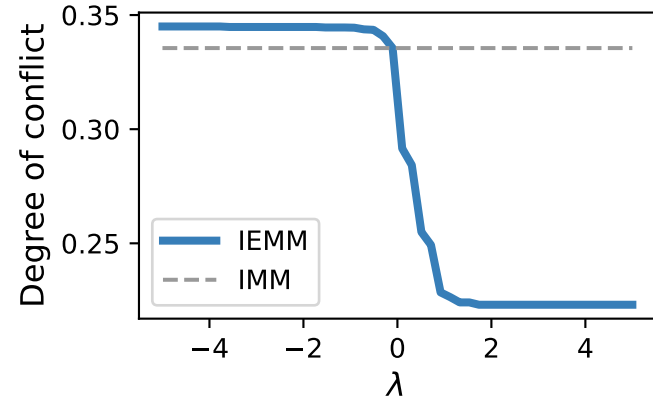

dataset full

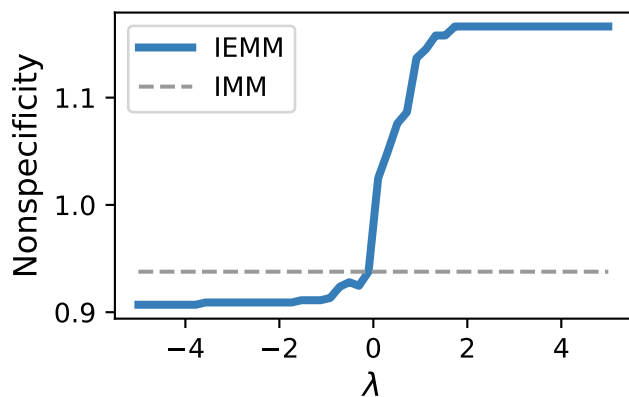

Supplement: supplementary_material [file synth_classic_metrics_all_classic_metrics.pdf › iemm/experiments/figs/synth_classic_metrics_all_classic_metrics.pdf]
