# Supplementary material
Source: ML conference proceedings conference paper supplement (https://openreview.net/forum?id=wKPQXtVejB)

dataset iris

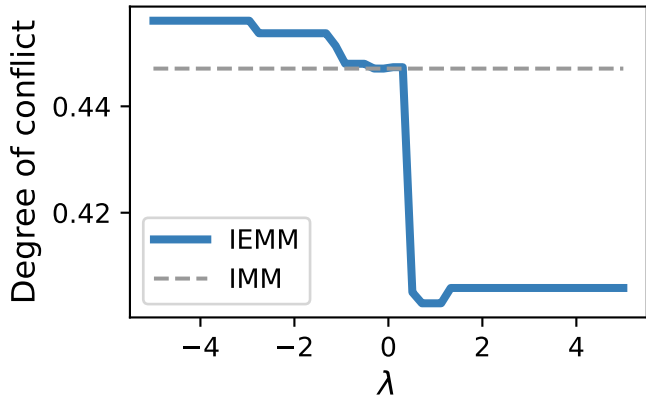

dataset iris

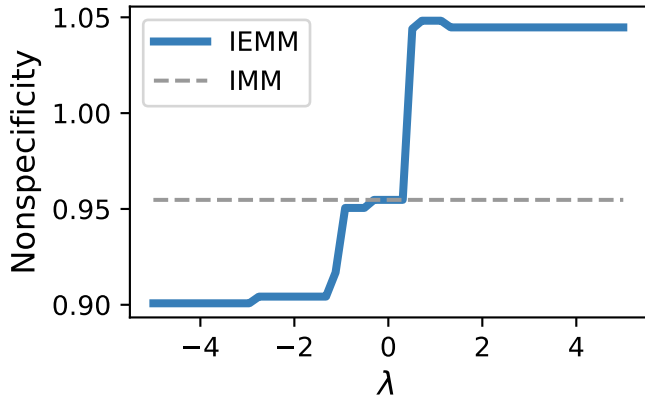

dataset wine

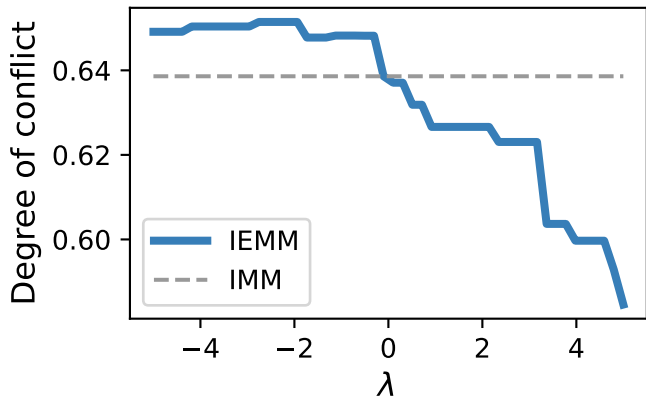

dataset wine

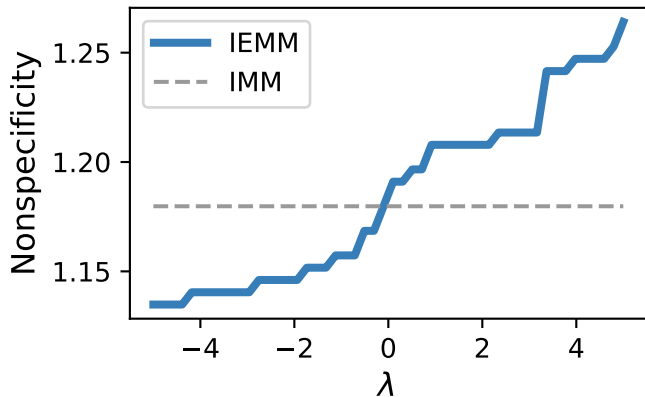

dataset diabetes

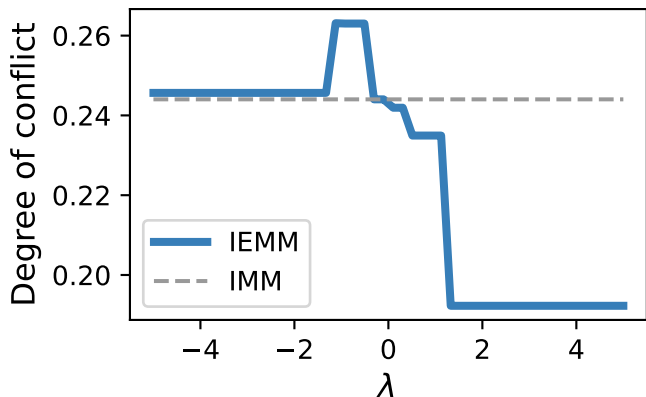

dataset diabetes

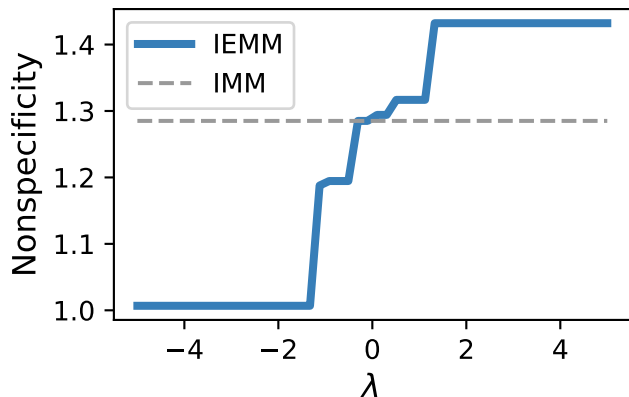

dataset Credal\_Dog-2

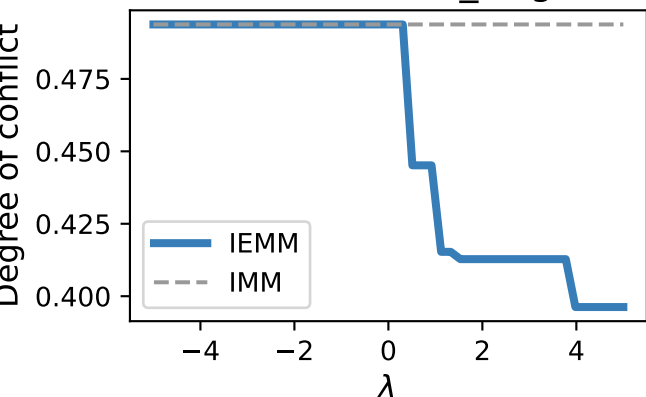

dataset Credal\_Dog-2

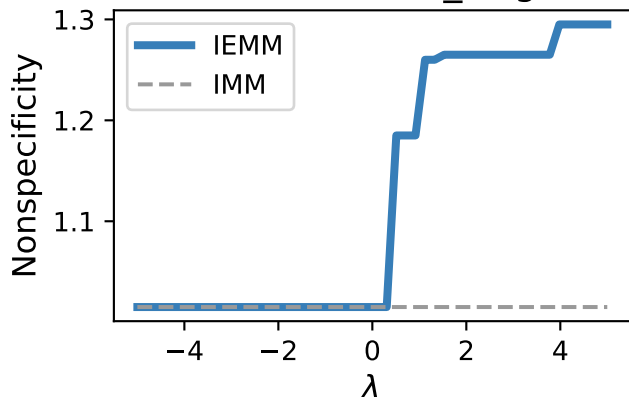

dataset Credal\_Dog-4

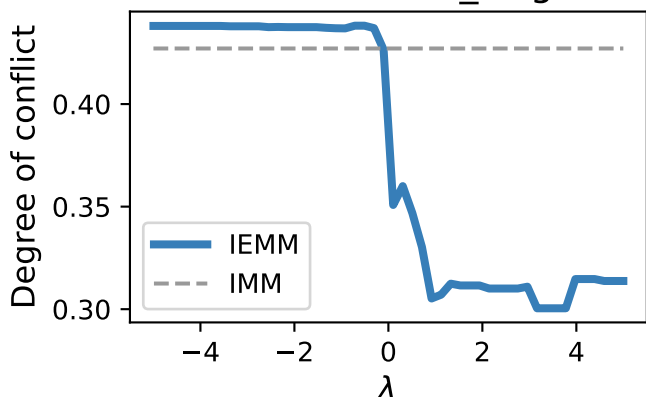

dataset Credal\_Dog-4

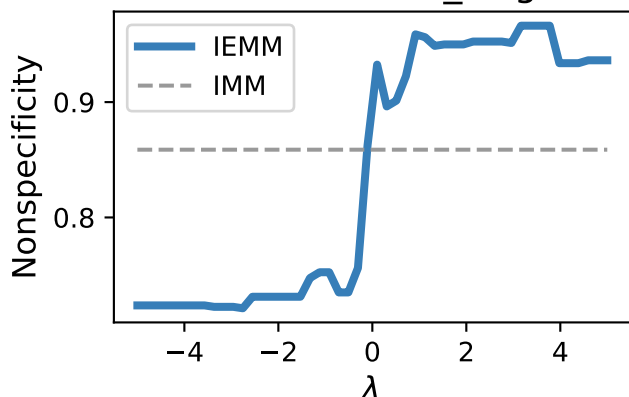

dataset Credal\_Bird-2

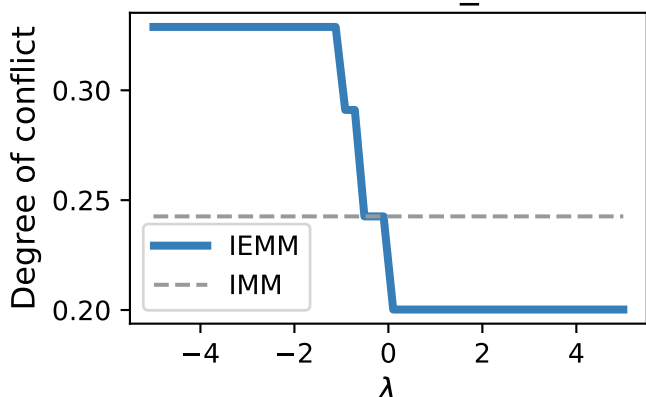

dataset Credal\_Bird-2

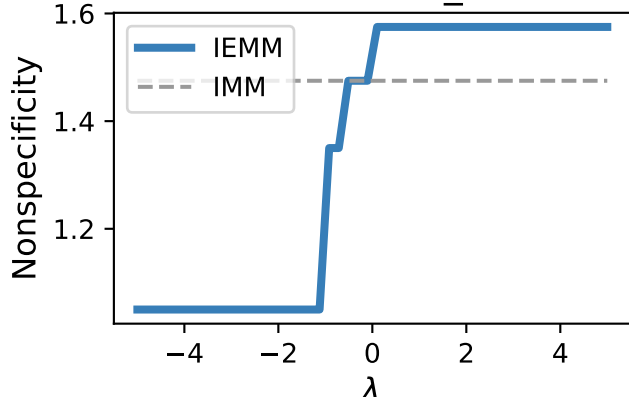

Supplement: supplementary_material [file validation_classic_metrics_all_classic_metrics.pdf › iemm/experiments/figs/validation_classic_metrics_all_classic_metrics.pdf]
