# Supplementary material
Source: ML conference proceedings conference paper supplement (https://openreview.net/forum?id=wKPQXtVejB)

dataset iris

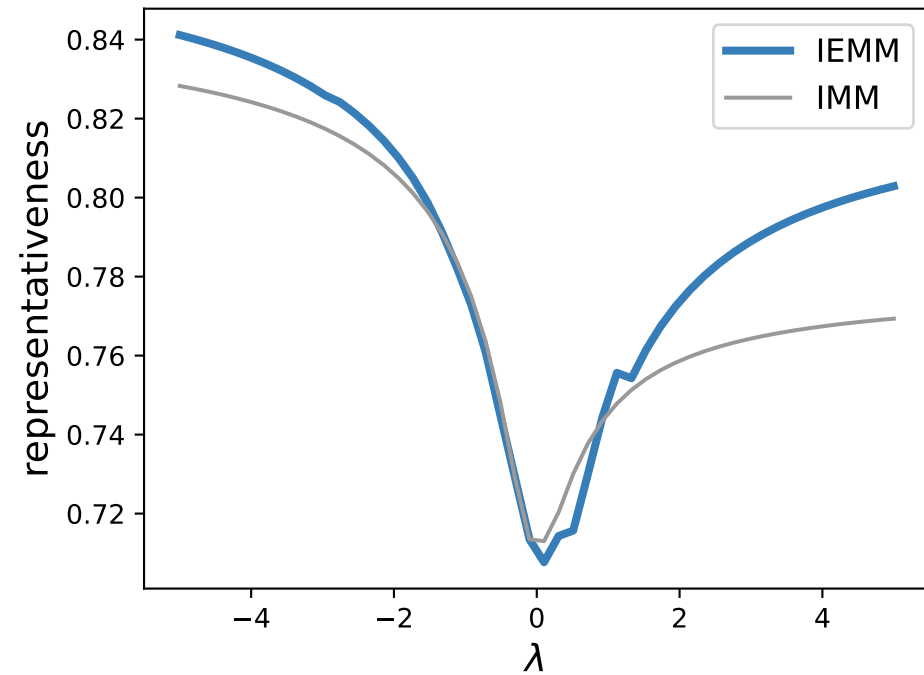

dataset wine

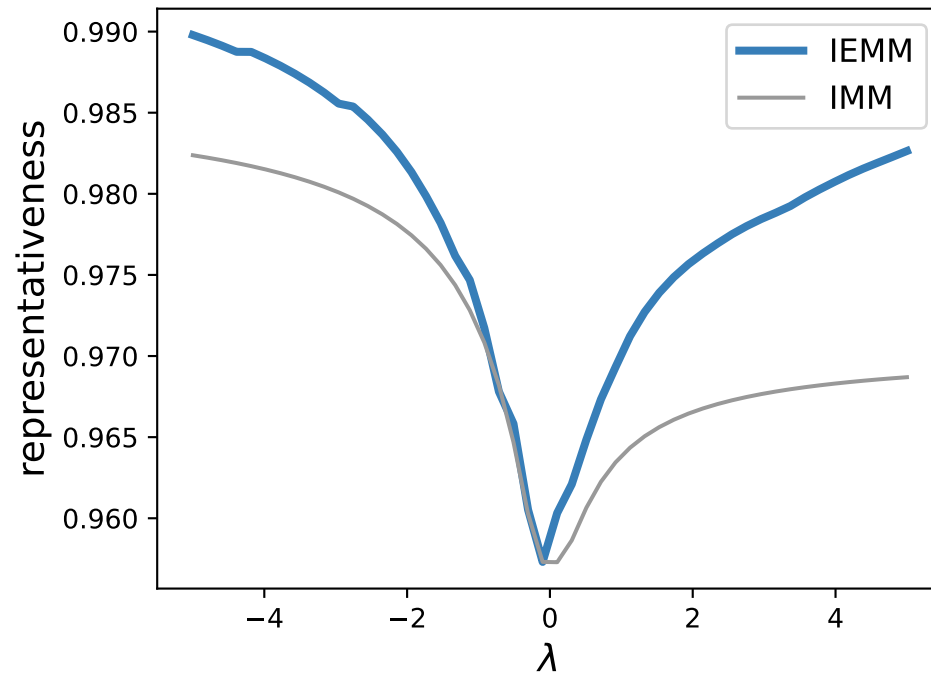

dataset diabetes

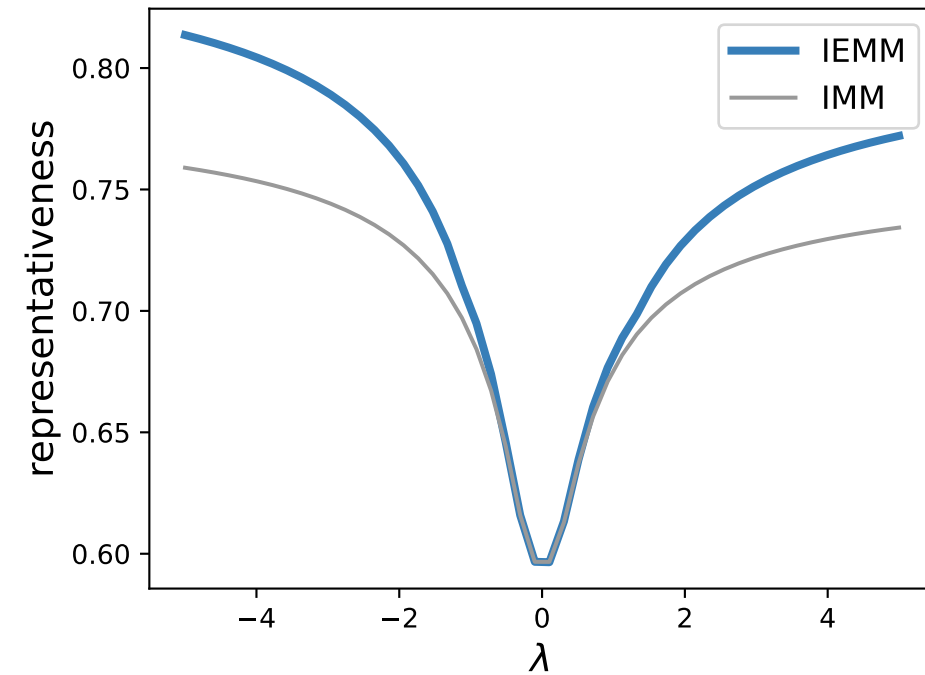

dataset Credal\_Dog-2

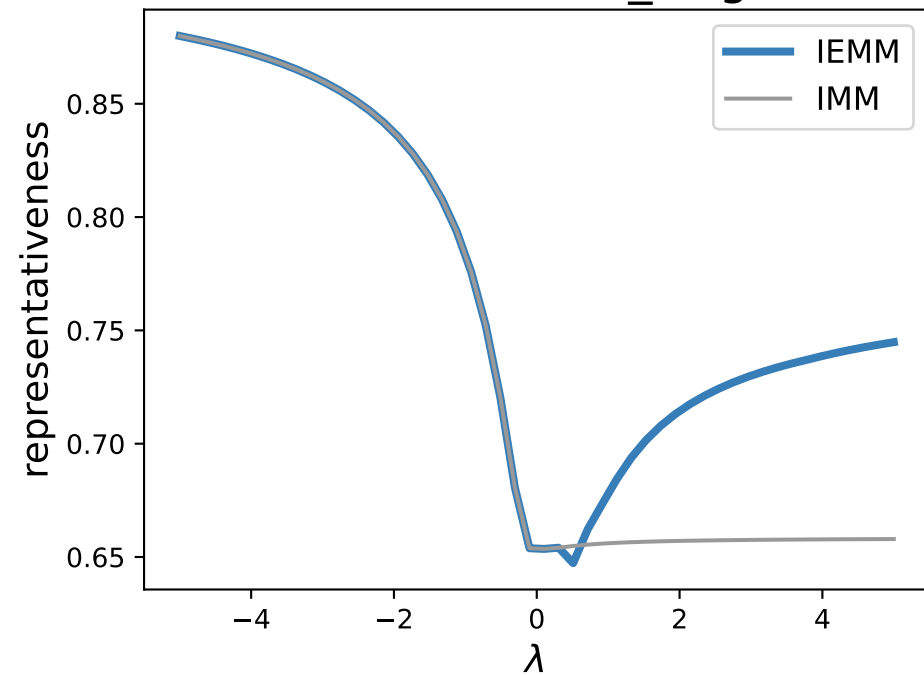

dataset Credal\_Dog-4

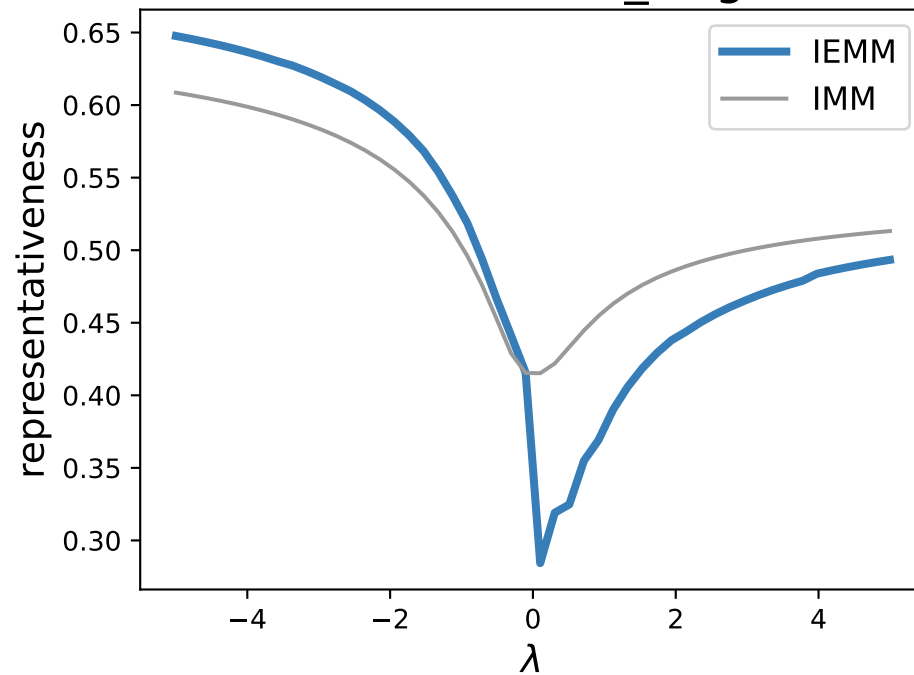

dataset Credal\_Bird-2

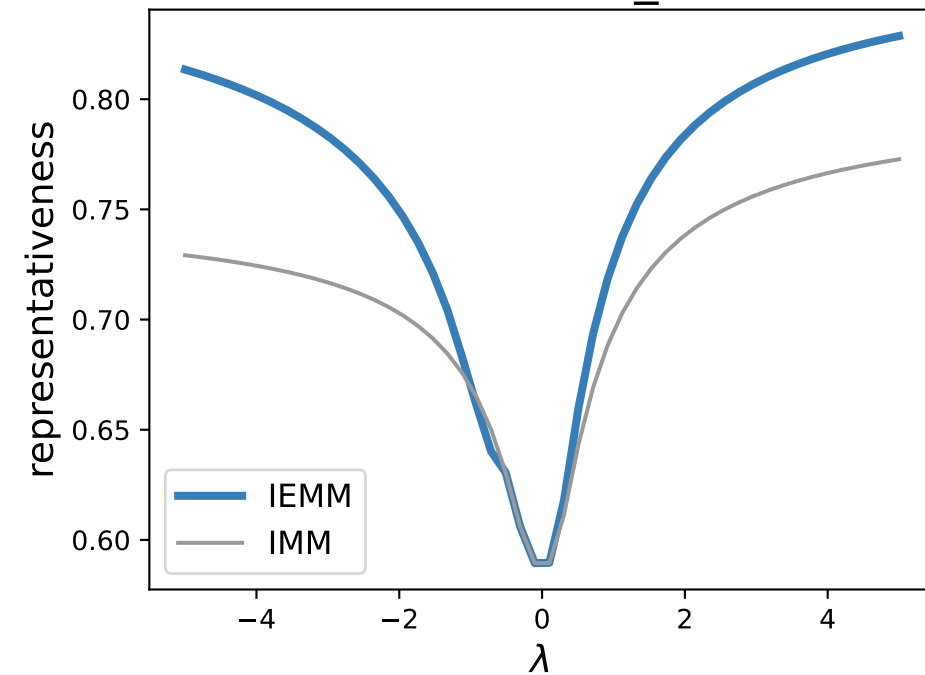

Supplement: supplementary_material [file validation_results_all_results.pdf › iemm/experiments/figs/validation_results_all_results.pdf]
