# Supplementary material
Source: ML conference proceedings conference paper supplement (https://openreview.net/forum?id=wKPQXtVejB)

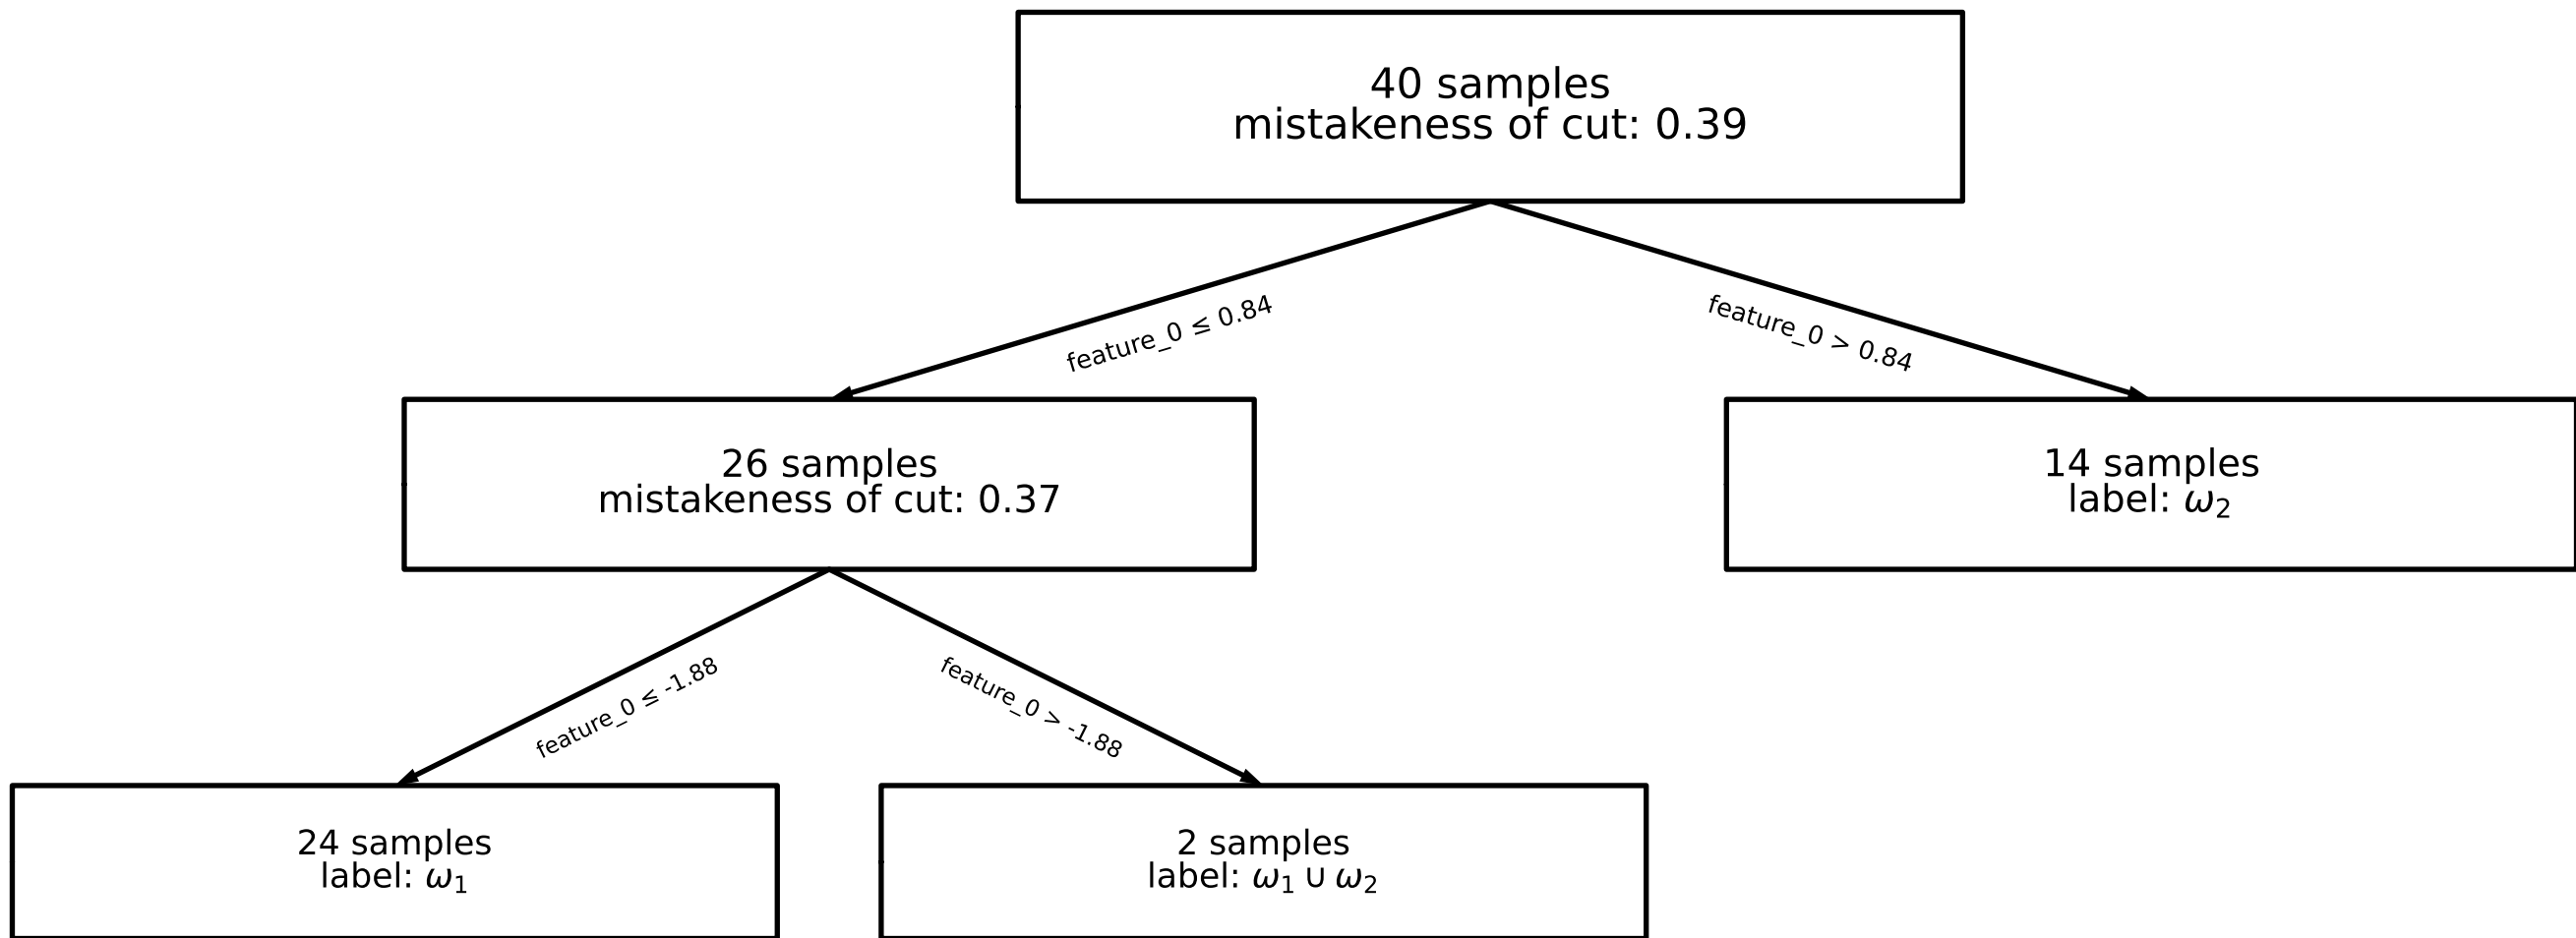

Supplement: supplementary_material [file diagram_-1.pdf › iemm/experiments/figs/Credal_Bird-2/Credal_Bird-2/diagram_-1.pdf]

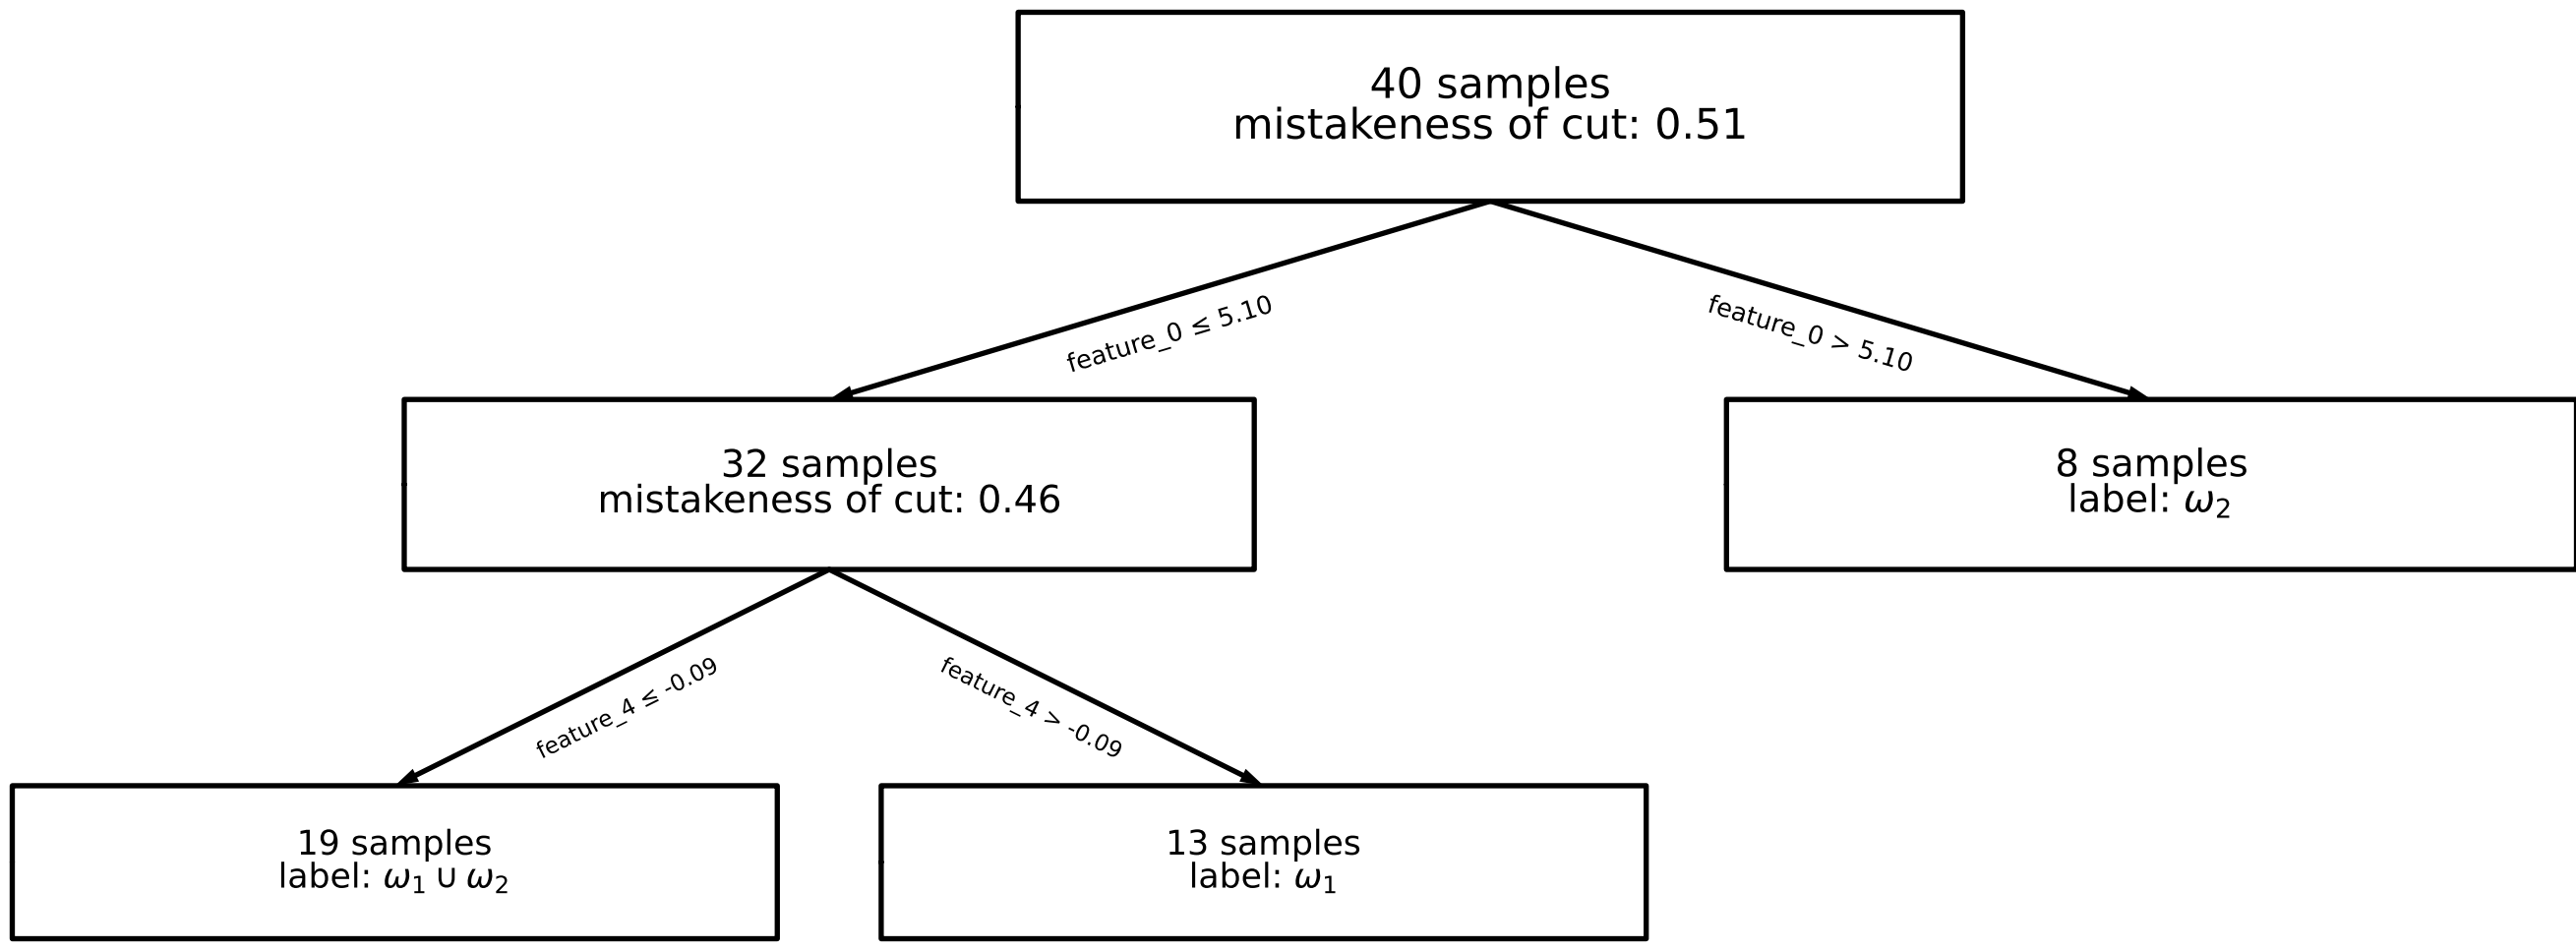

Supplement: supplementary_material [file diagram_0.pdf › iemm/experiments/figs/Credal_Bird-2/Credal_Bird-2/diagram_0.pdf]

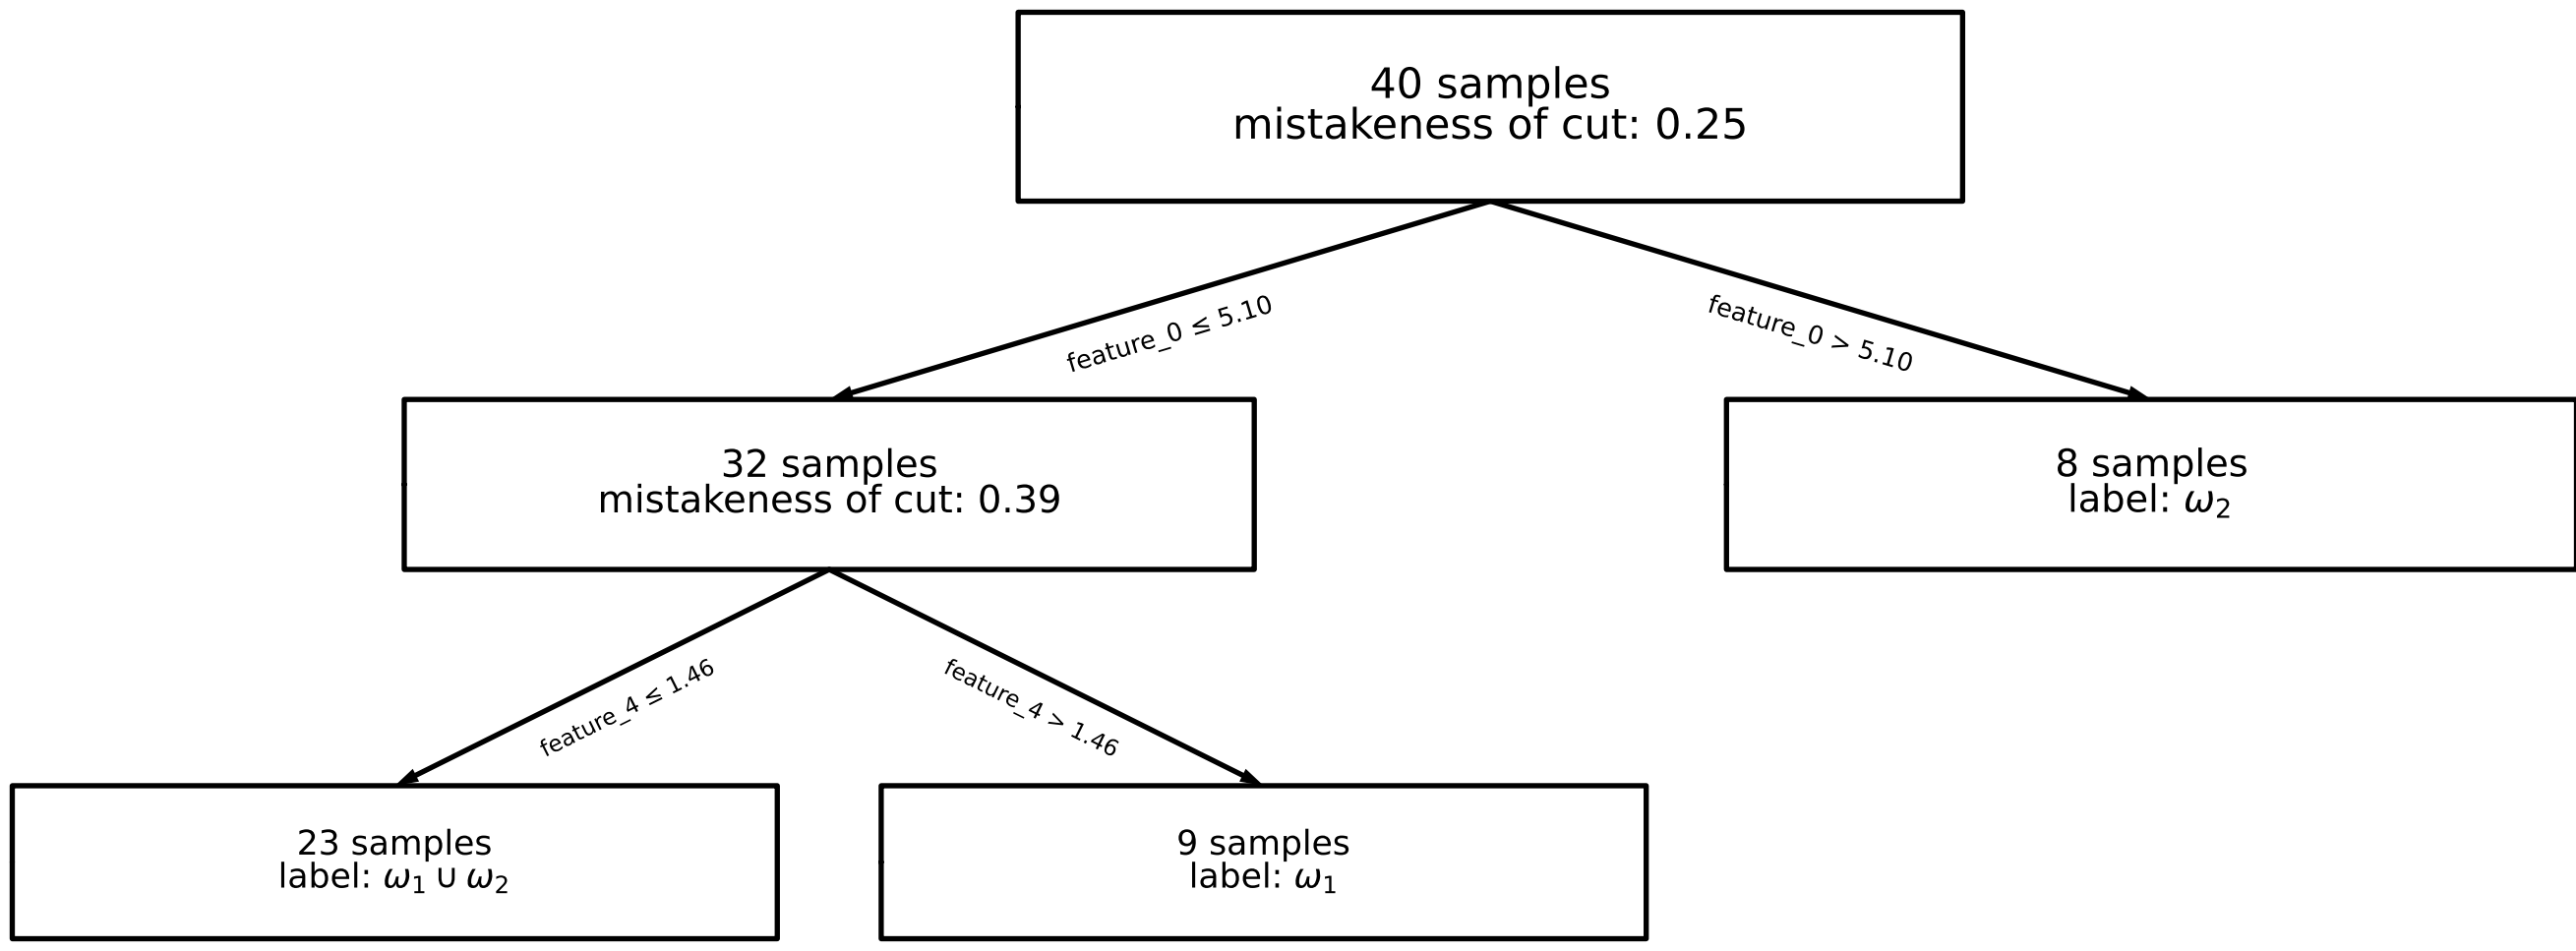

Supplement: supplementary_material [file diagram_1.pdf › iemm/experiments/figs/Credal_Bird-2/Credal_Bird-2/diagram_1.pdf]

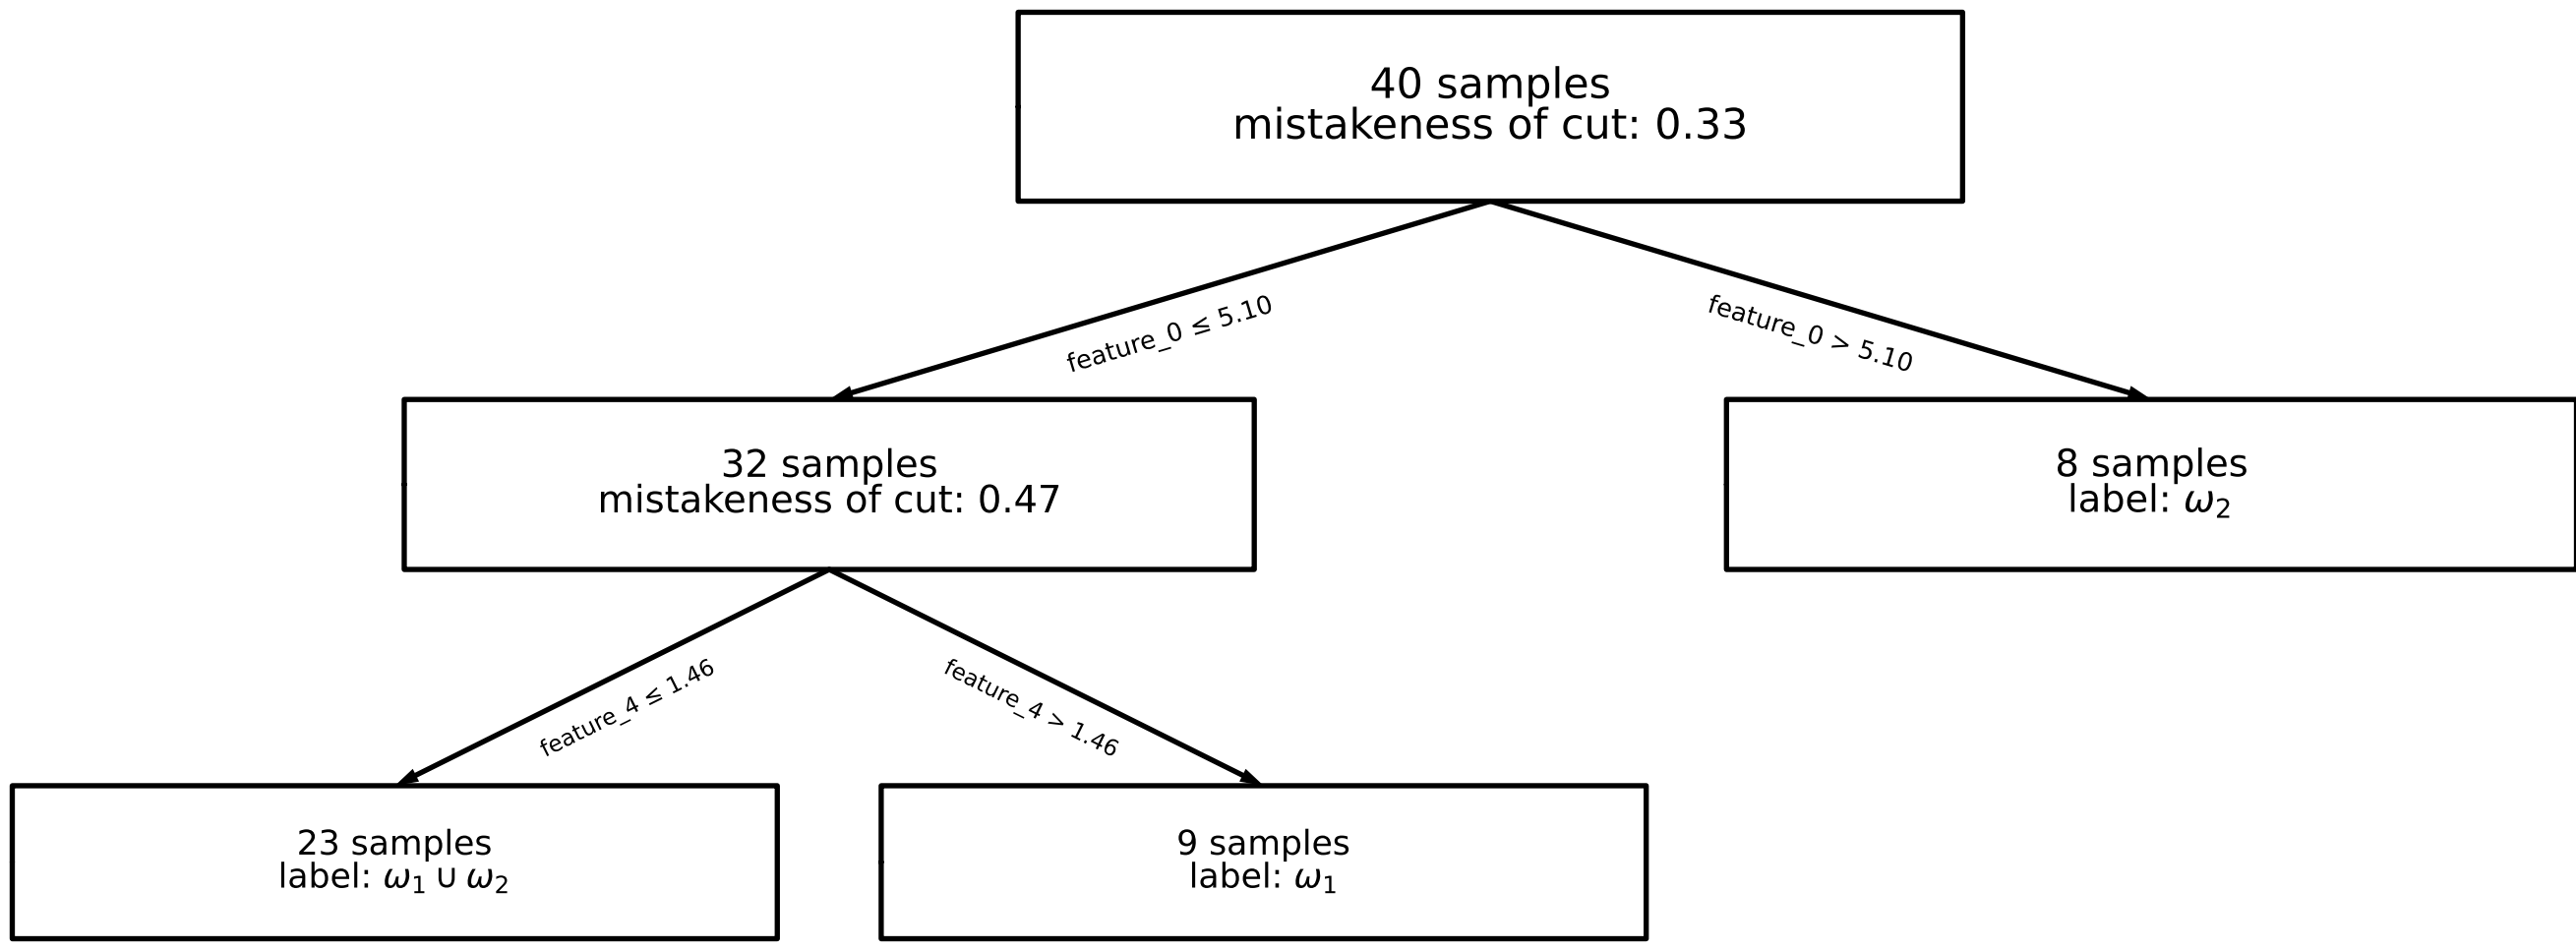

Supplement: supplementary_material [file diagram_inf.pdf › iemm/experiments/figs/Credal_Bird-2/Credal_Bird-2/diagram_inf.pdf]

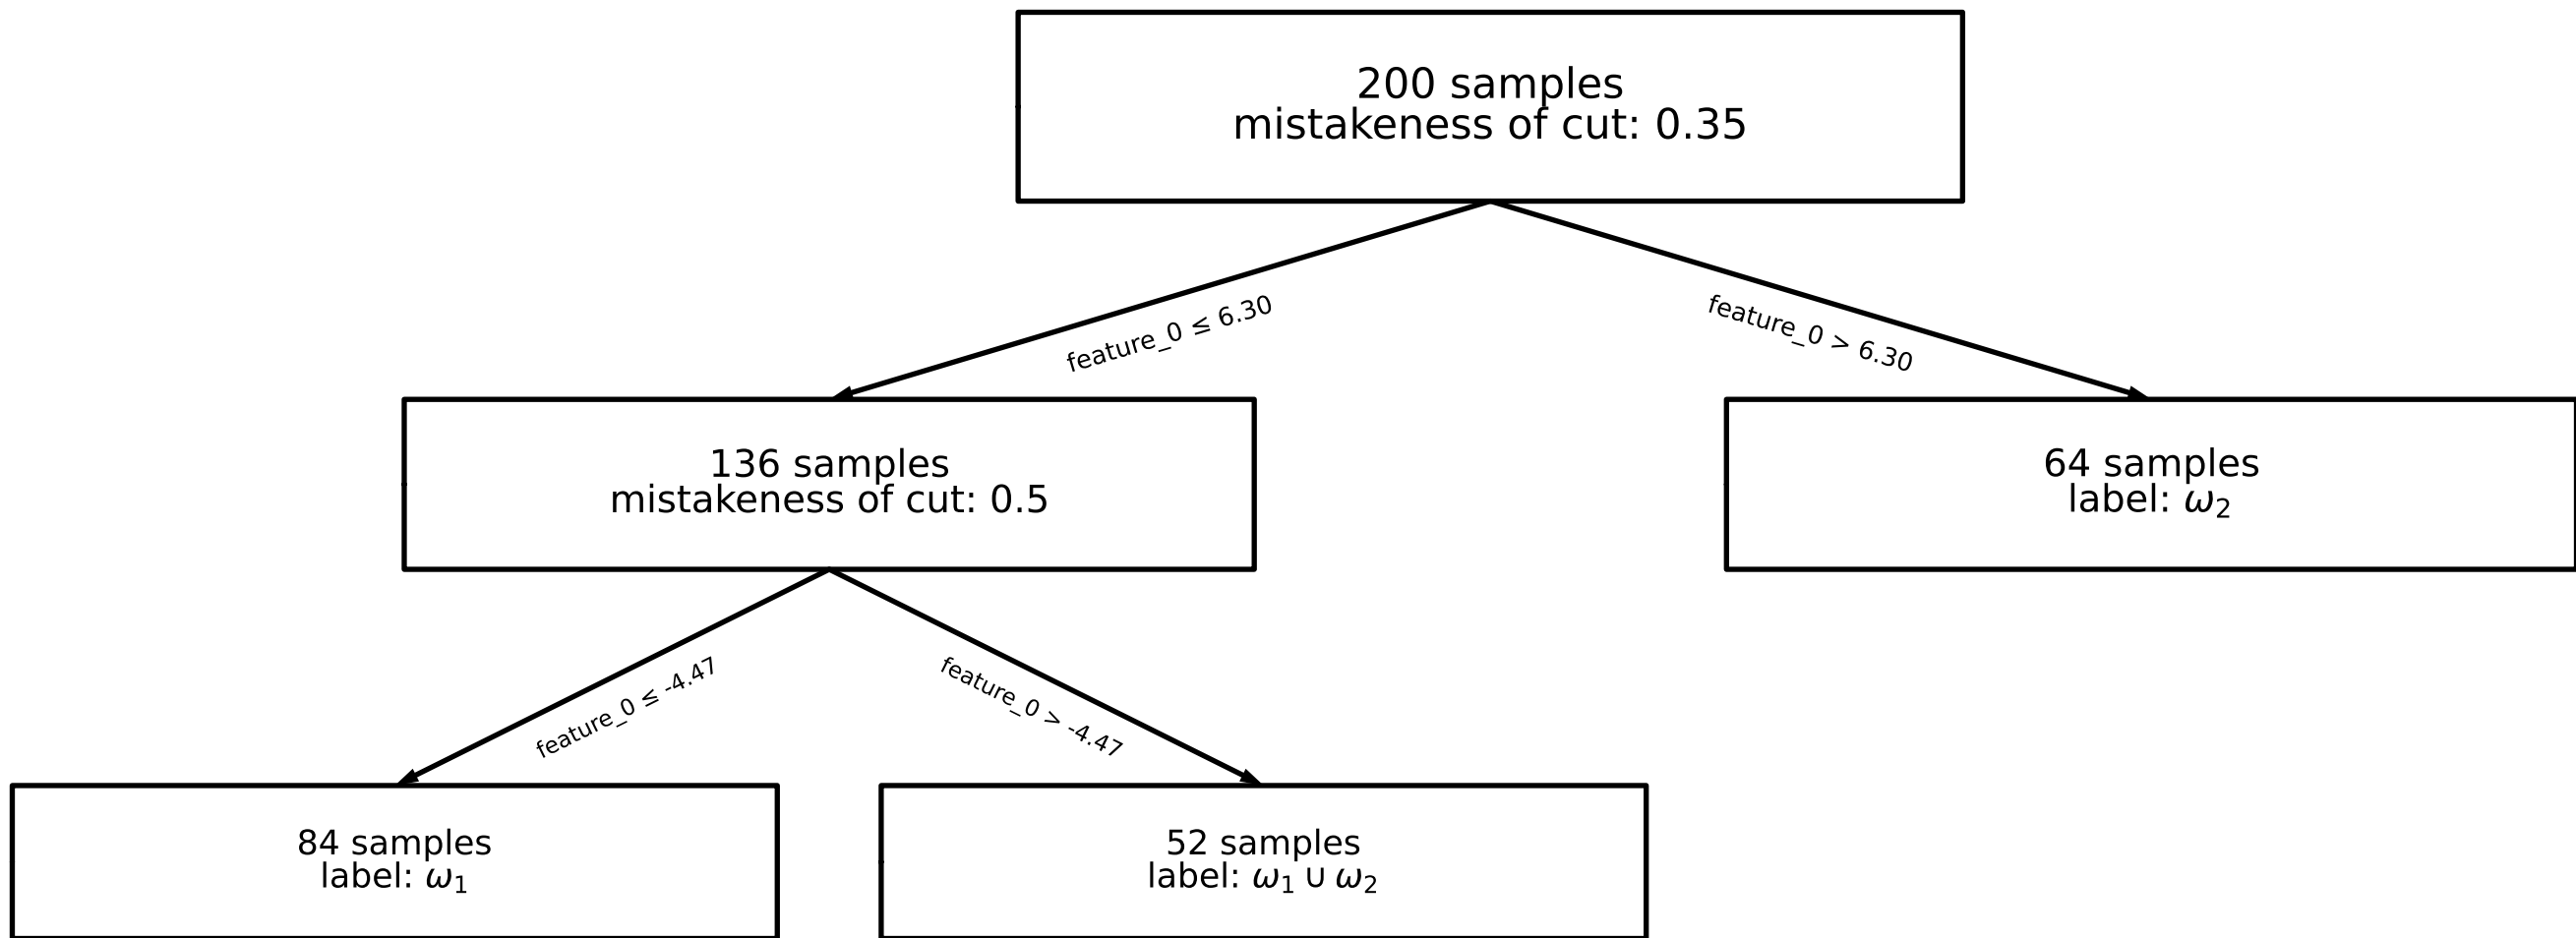

Supplement: supplementary_material [file diagram_1.pdf › iemm/experiments/figs/Credal_Dog-2/Credal_Dog-2/diagram_1.pdf]

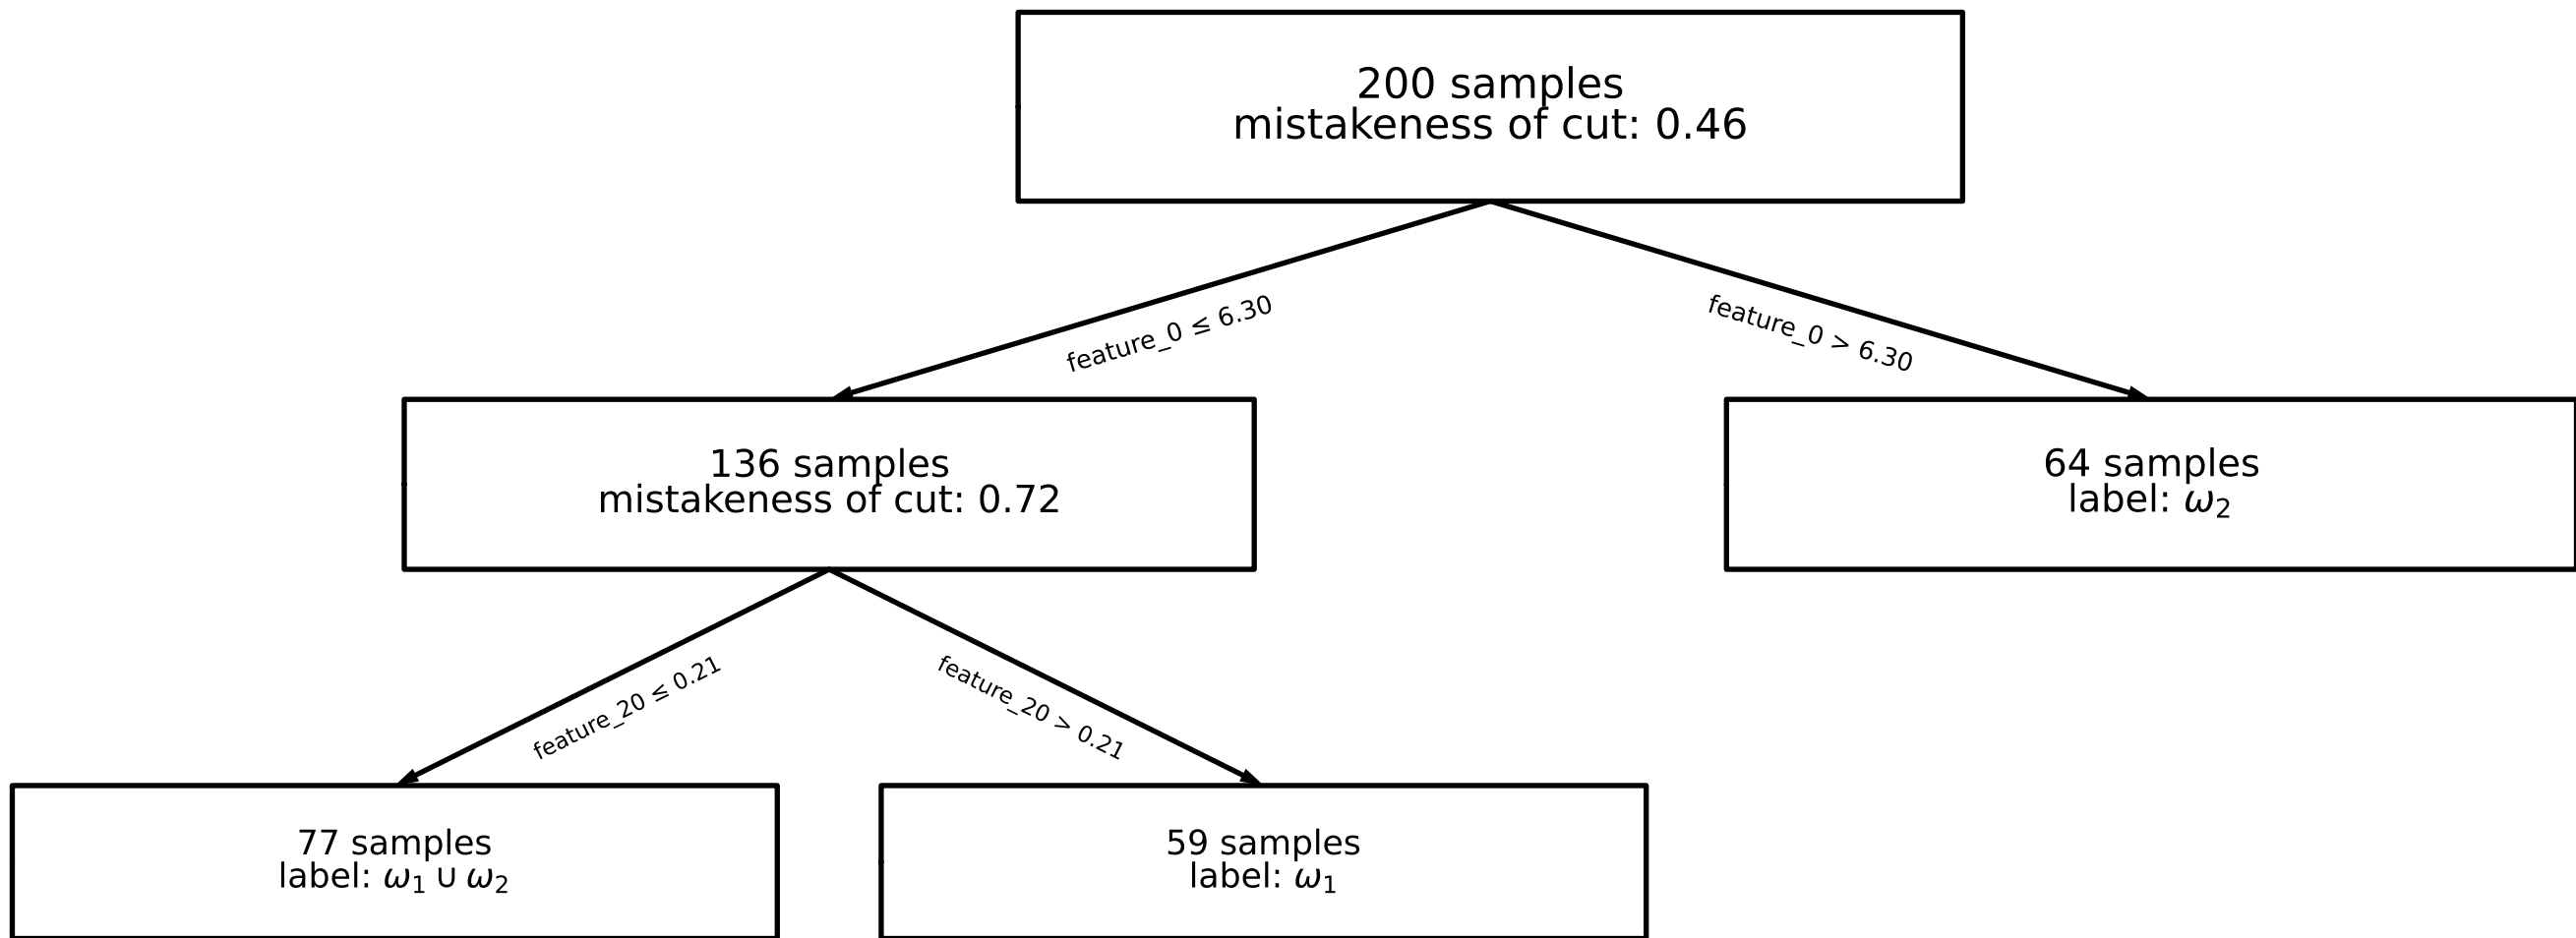

Supplement: supplementary_material [file diagram_inf.pdf › iemm/experiments/figs/Credal_Dog-2/Credal_Dog-2/diagram_inf.pdf]

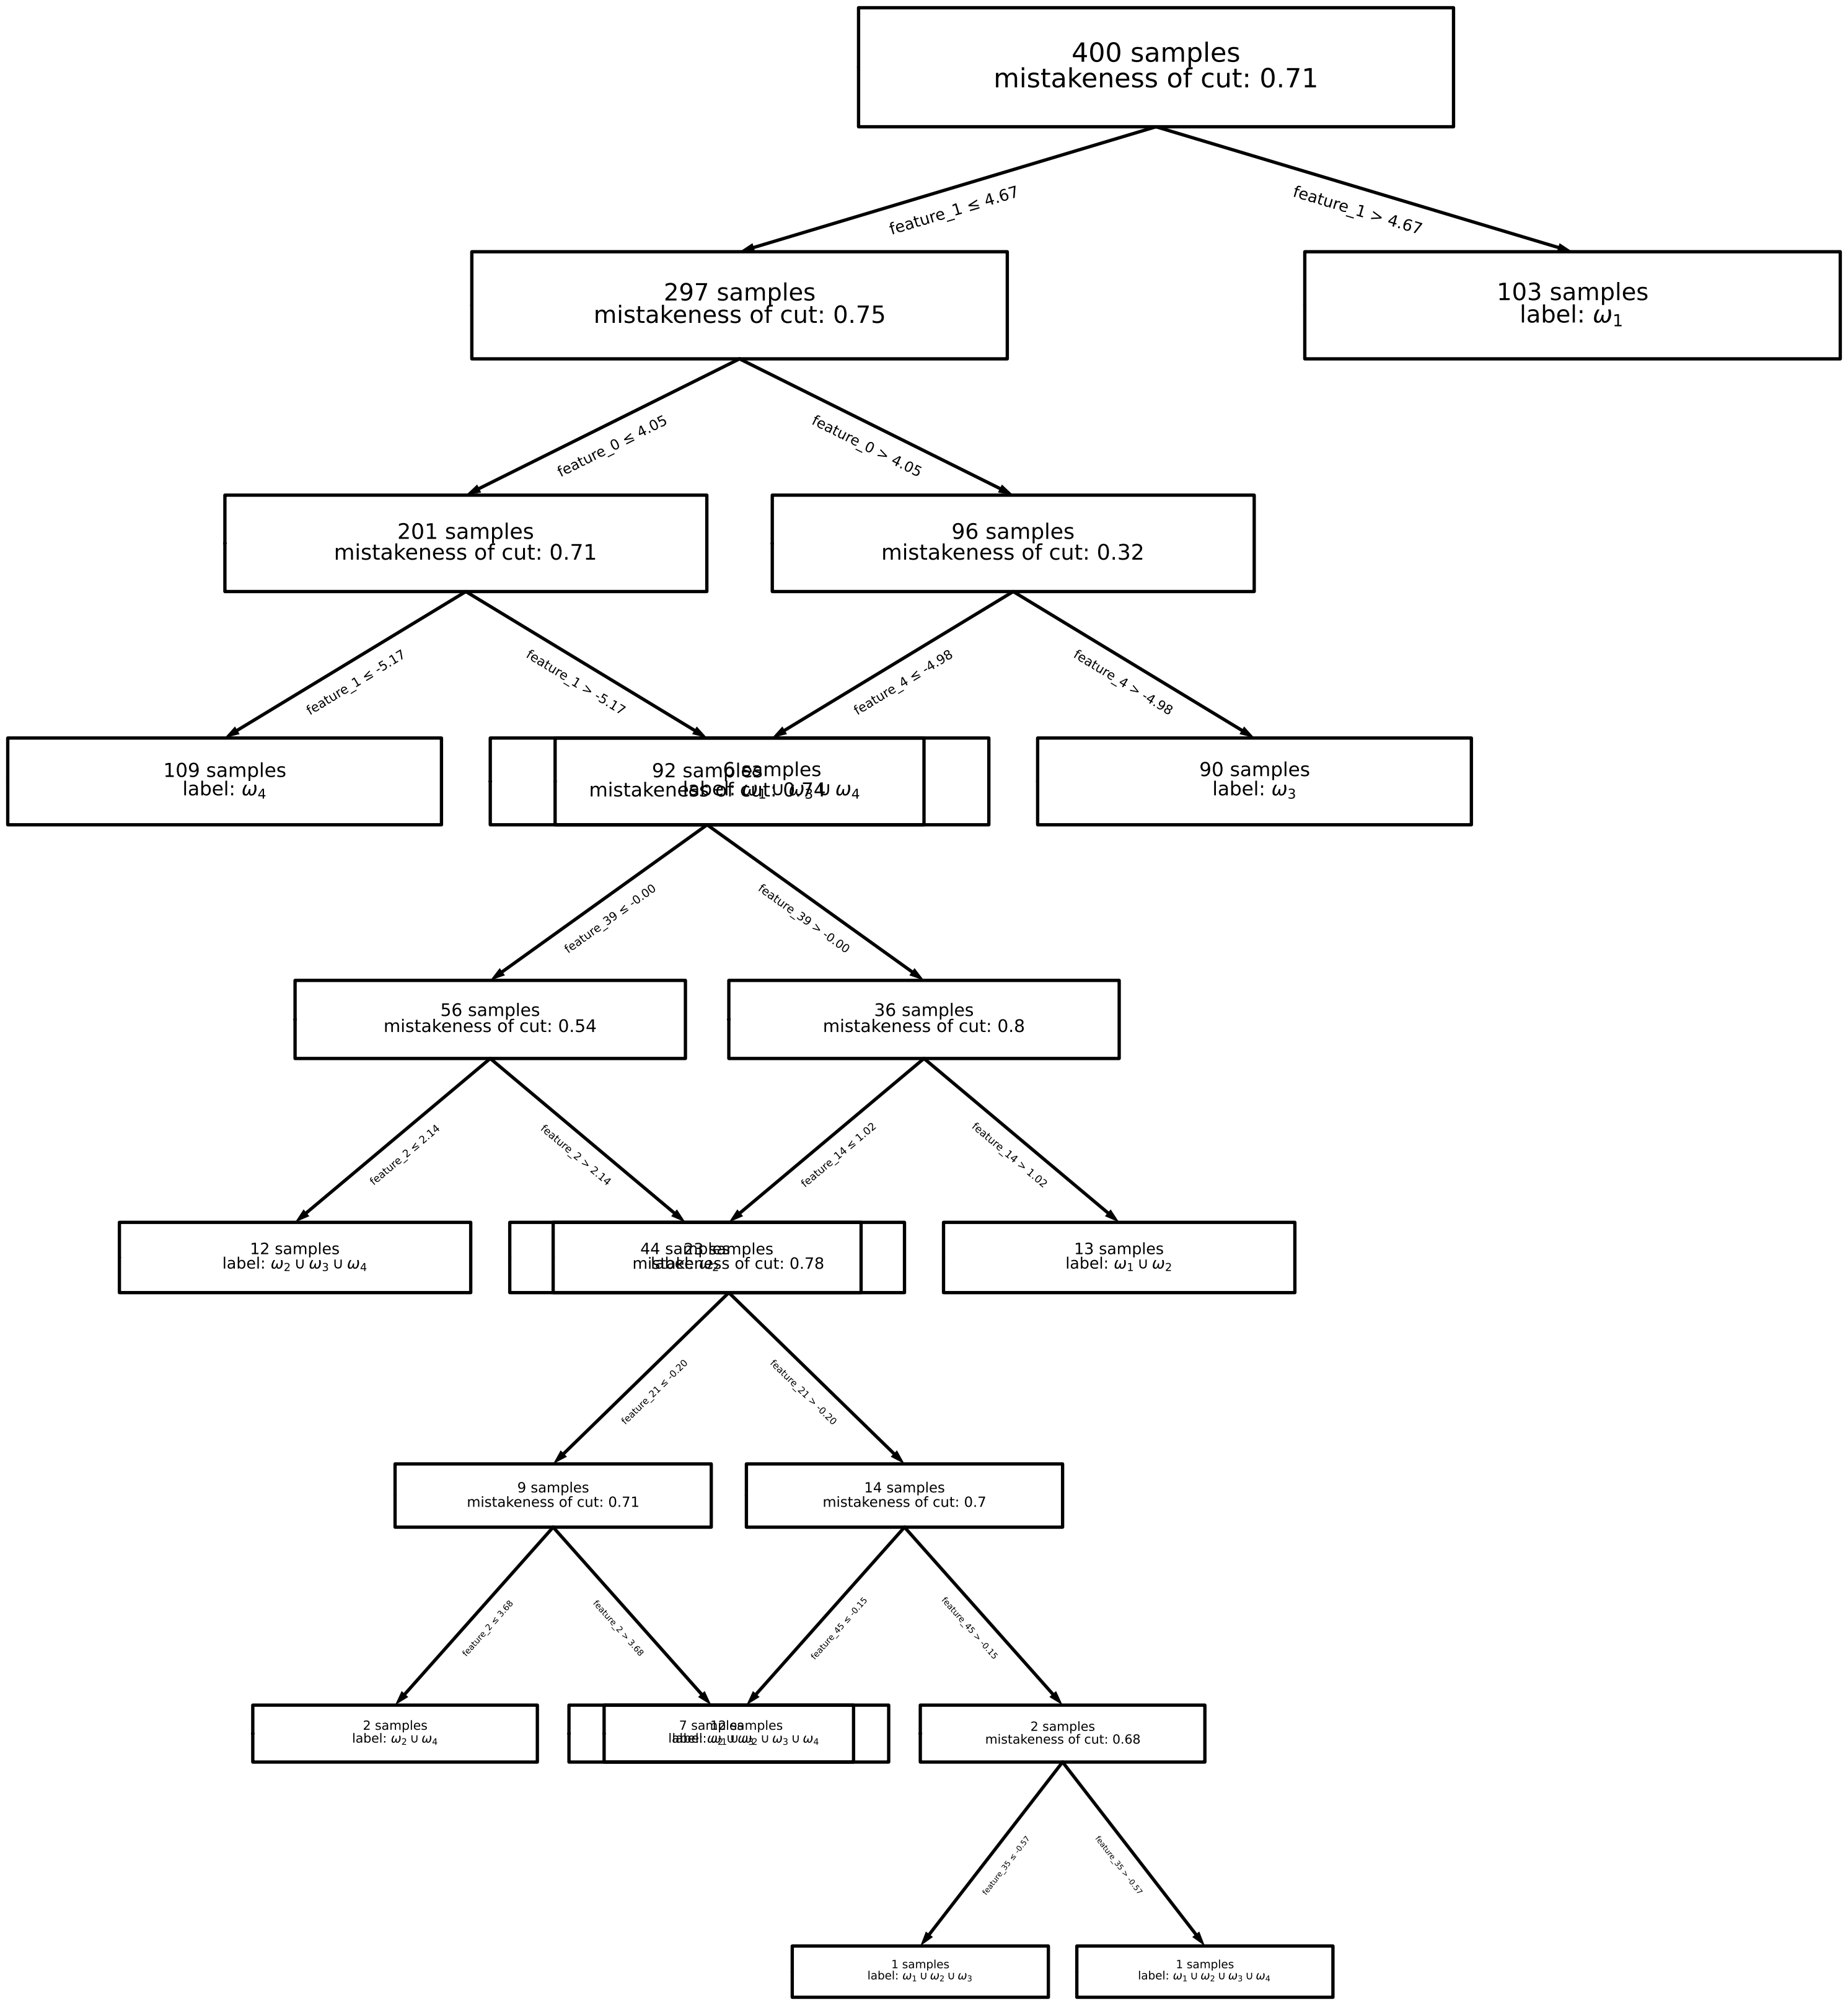

Supplement: supplementary_material [file diagram_-1.pdf › iemm/experiments/figs/Credal_Dog-4/Credal_Dog-4/diagram_-1.pdf]

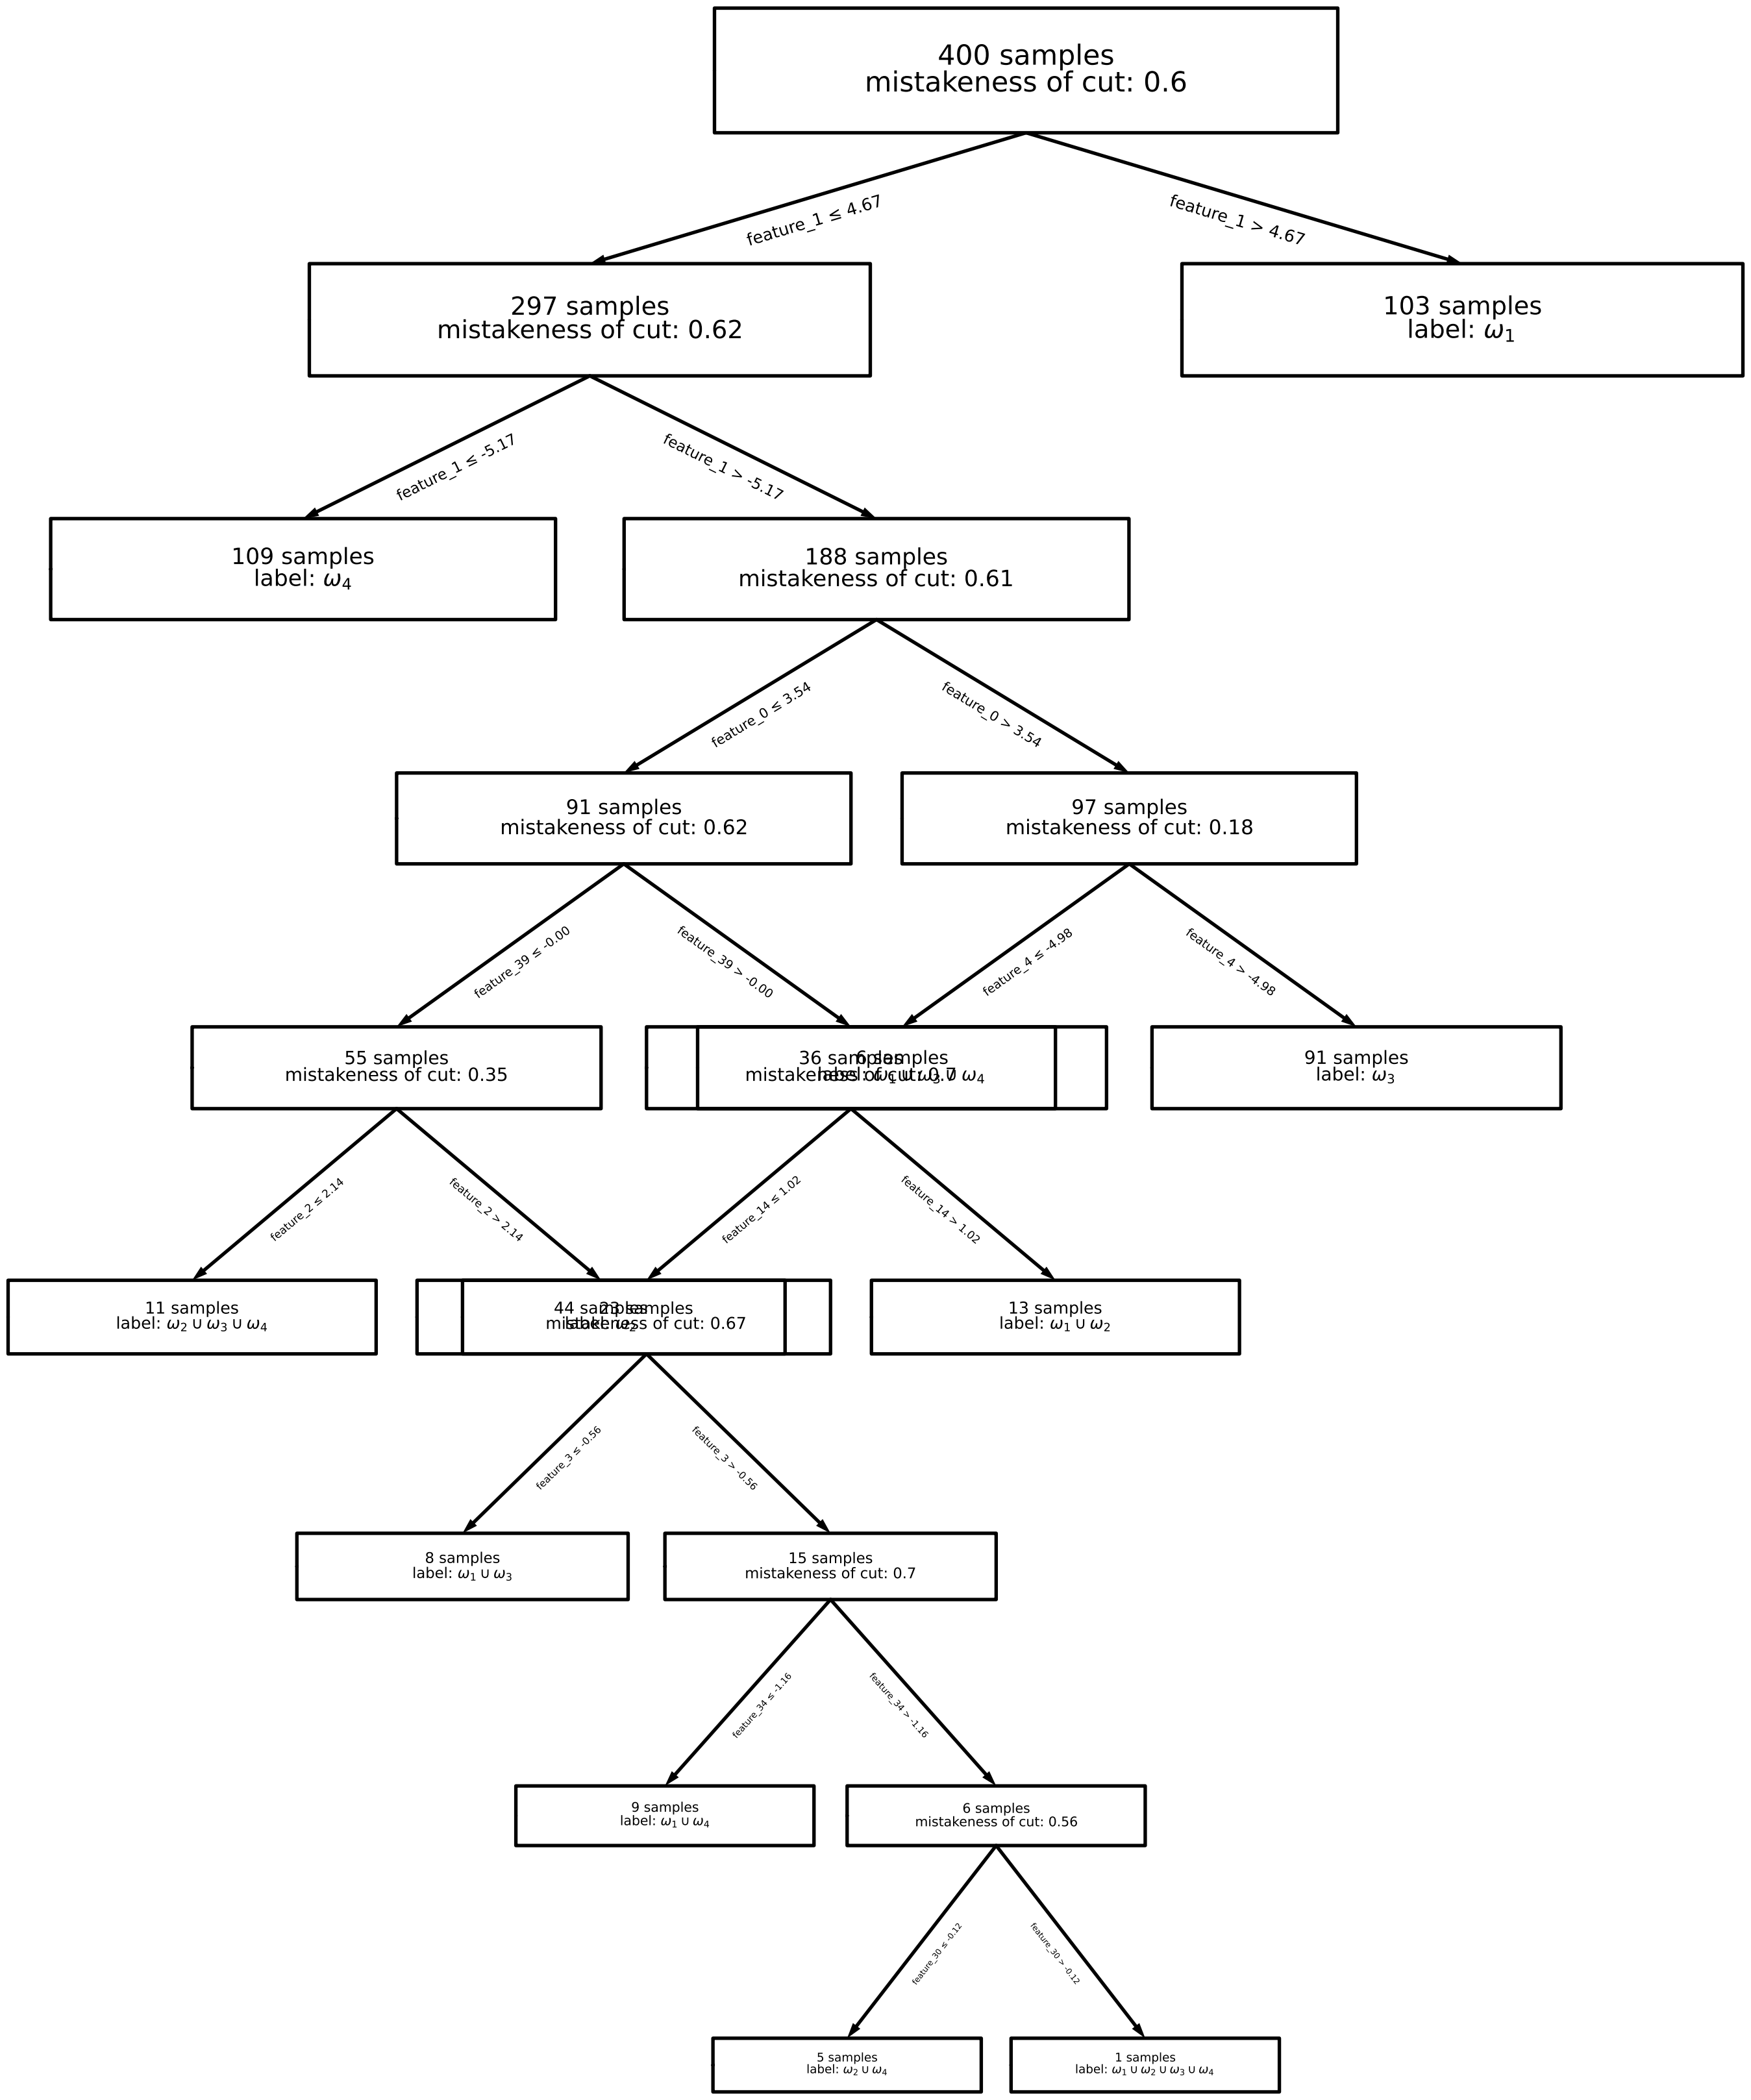

Supplement: supplementary_material [file diagram_-inf.pdf › iemm/experiments/figs/Credal_Dog-4/Credal_Dog-4/diagram_-inf.pdf]

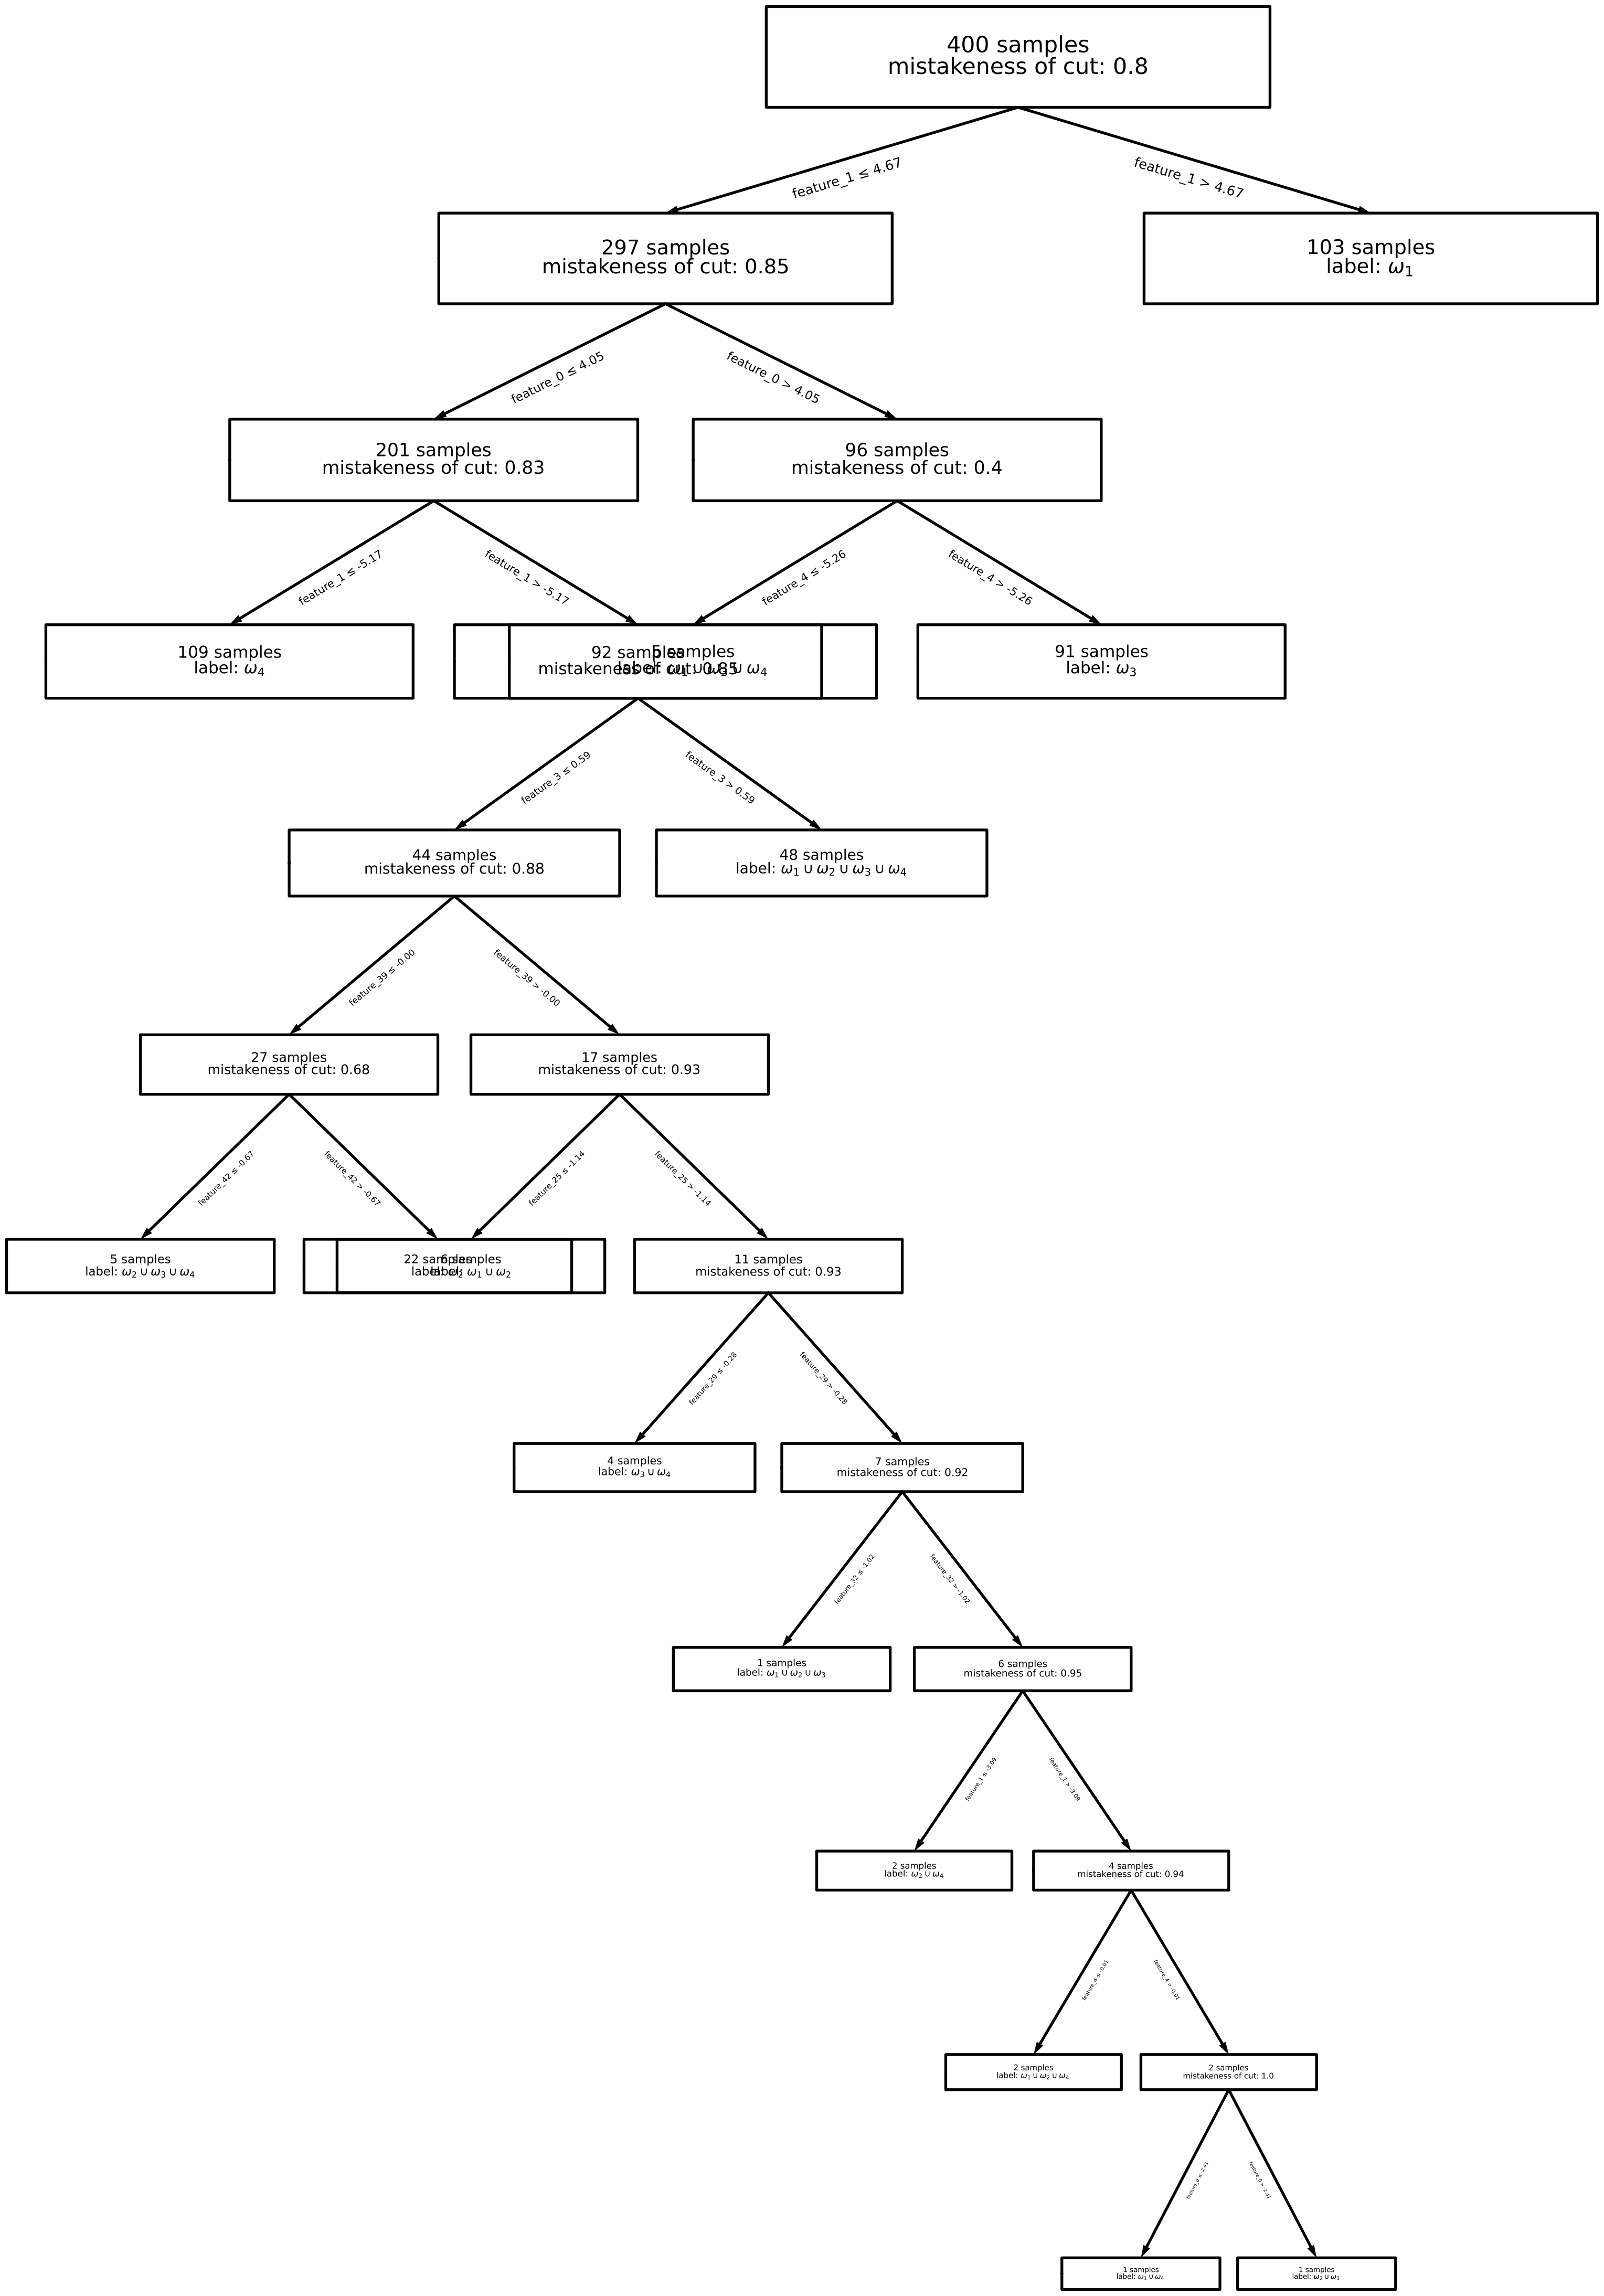

Supplement: supplementary_material [file diagram_0.pdf › iemm/experiments/figs/Credal_Dog-4/Credal_Dog-4/diagram_0.pdf]

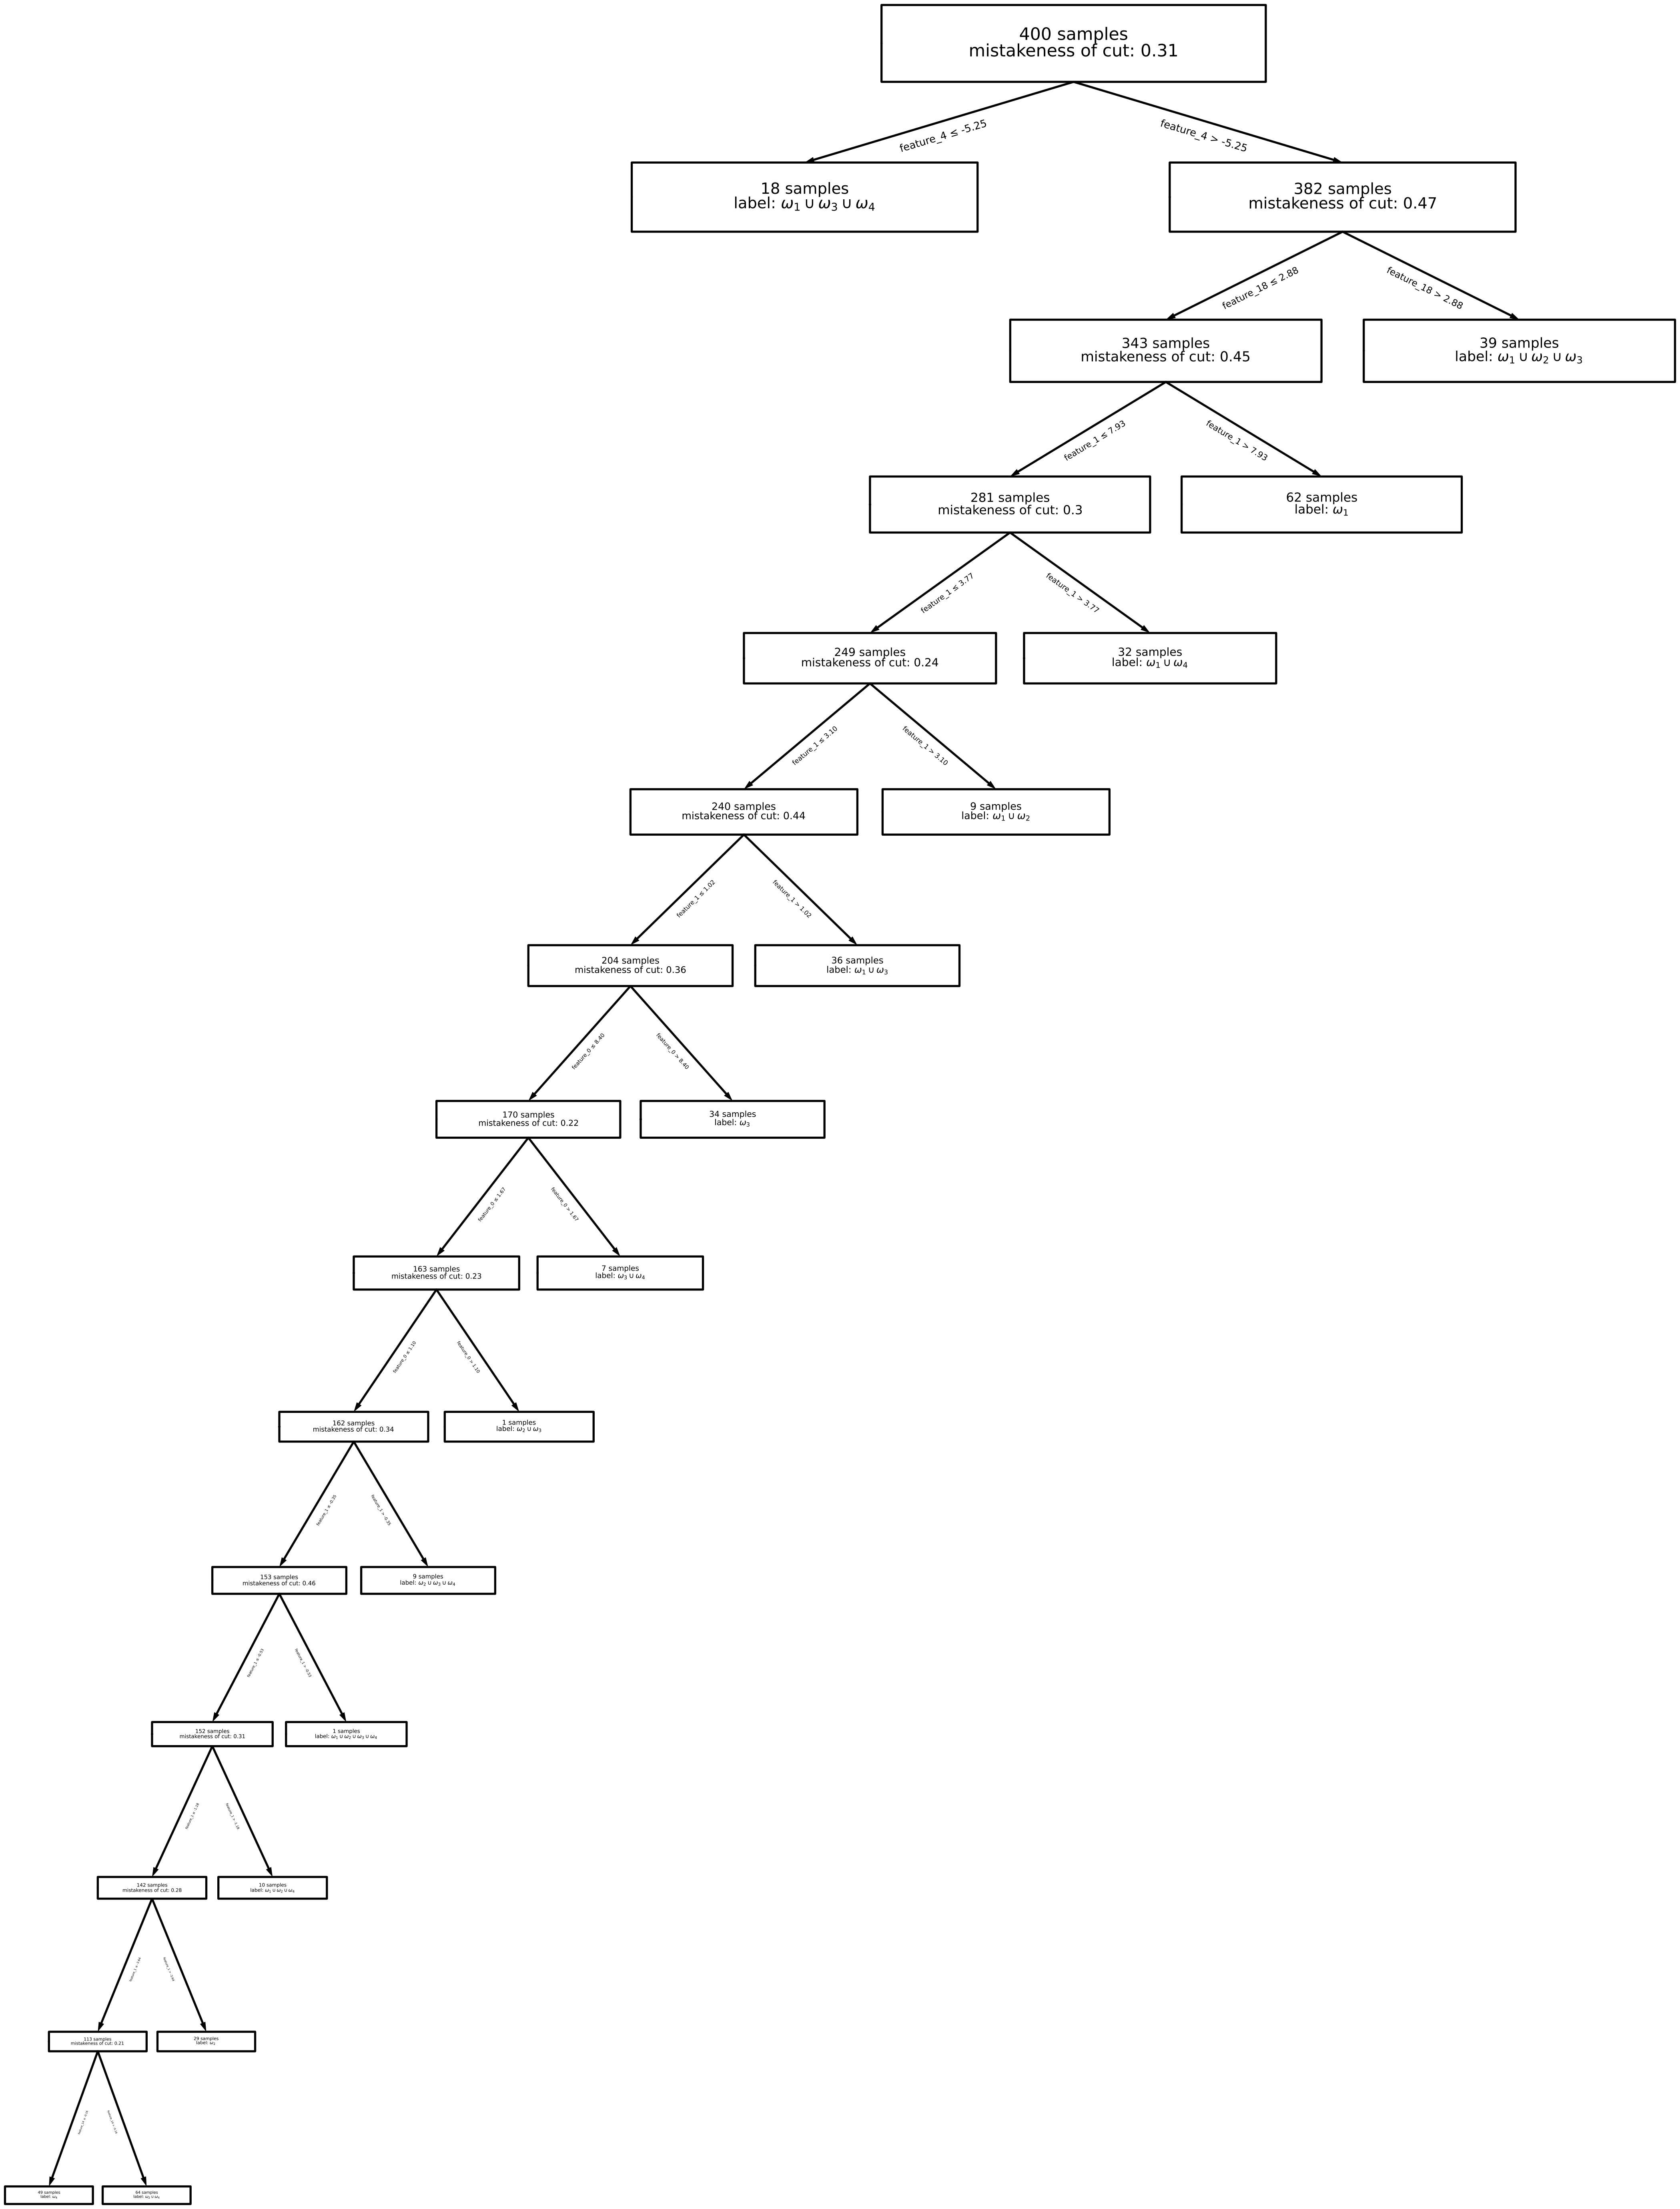

Supplement: supplementary_material [file diagram_1.pdf › iemm/experiments/figs/Credal_Dog-4/Credal_Dog-4/diagram_1.pdf]

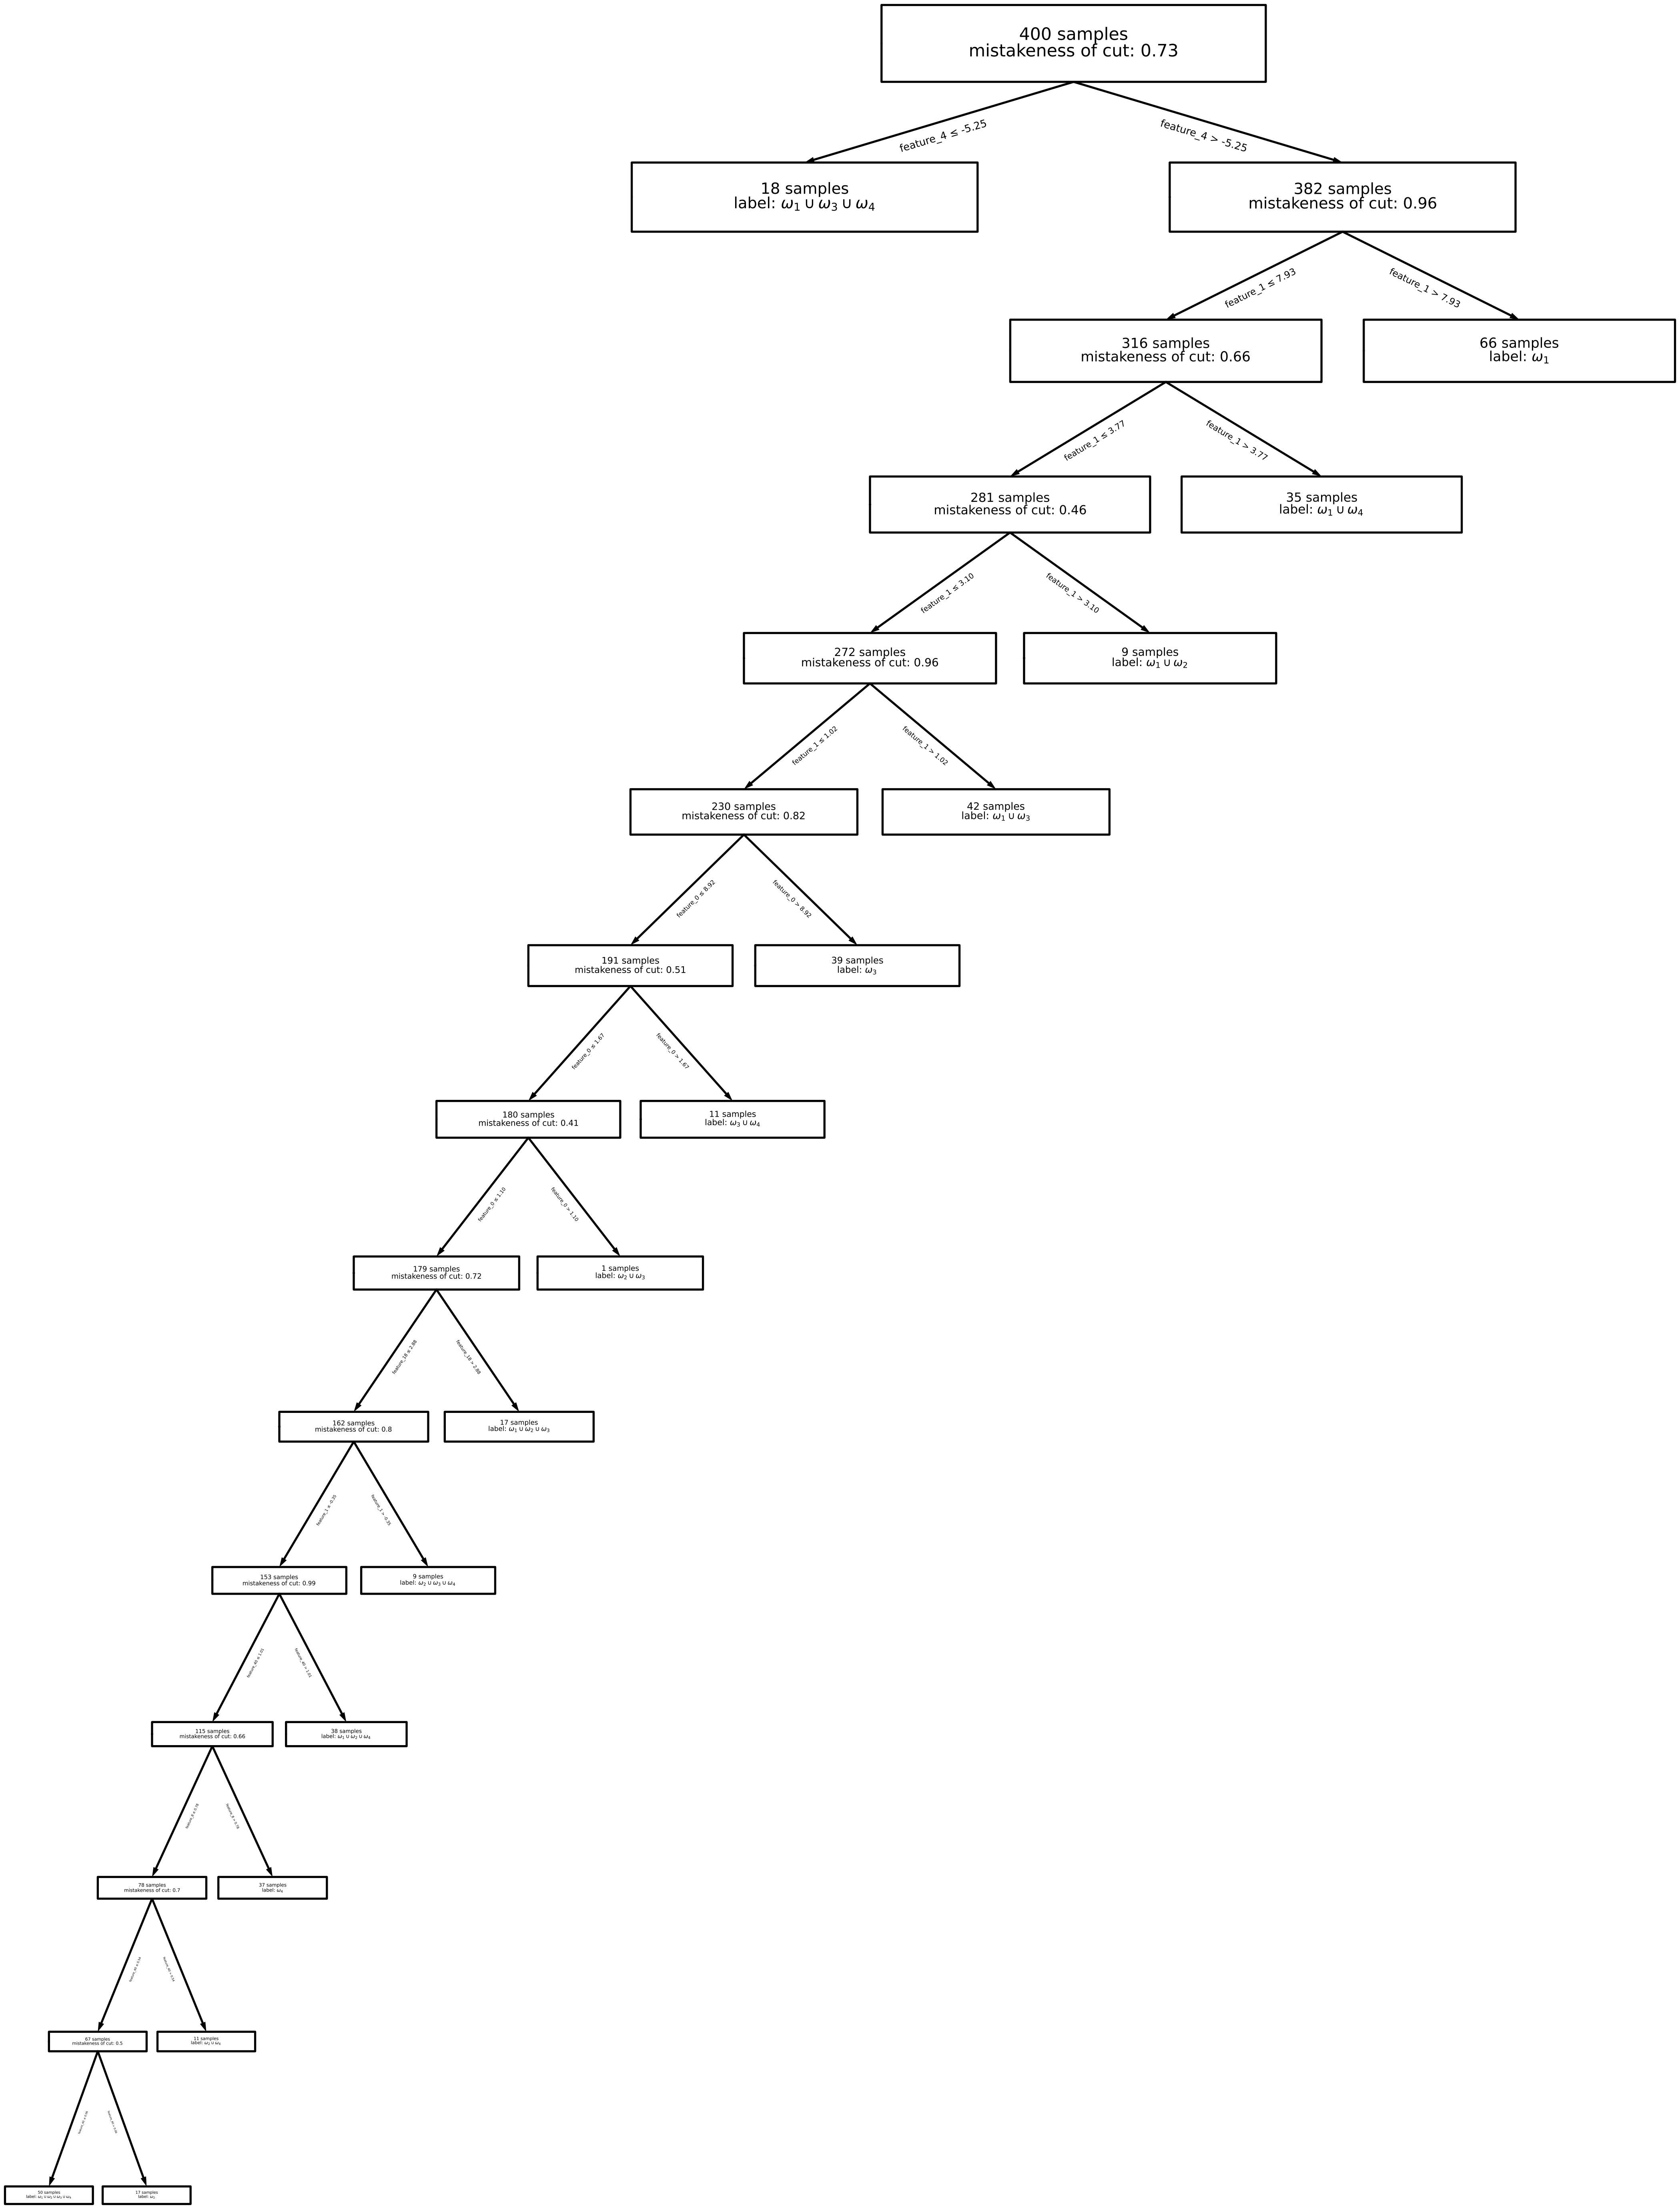

Supplement: supplementary_material [file diagram_inf.pdf › iemm/experiments/figs/Credal_Dog-4/Credal_Dog-4/diagram_inf.pdf]

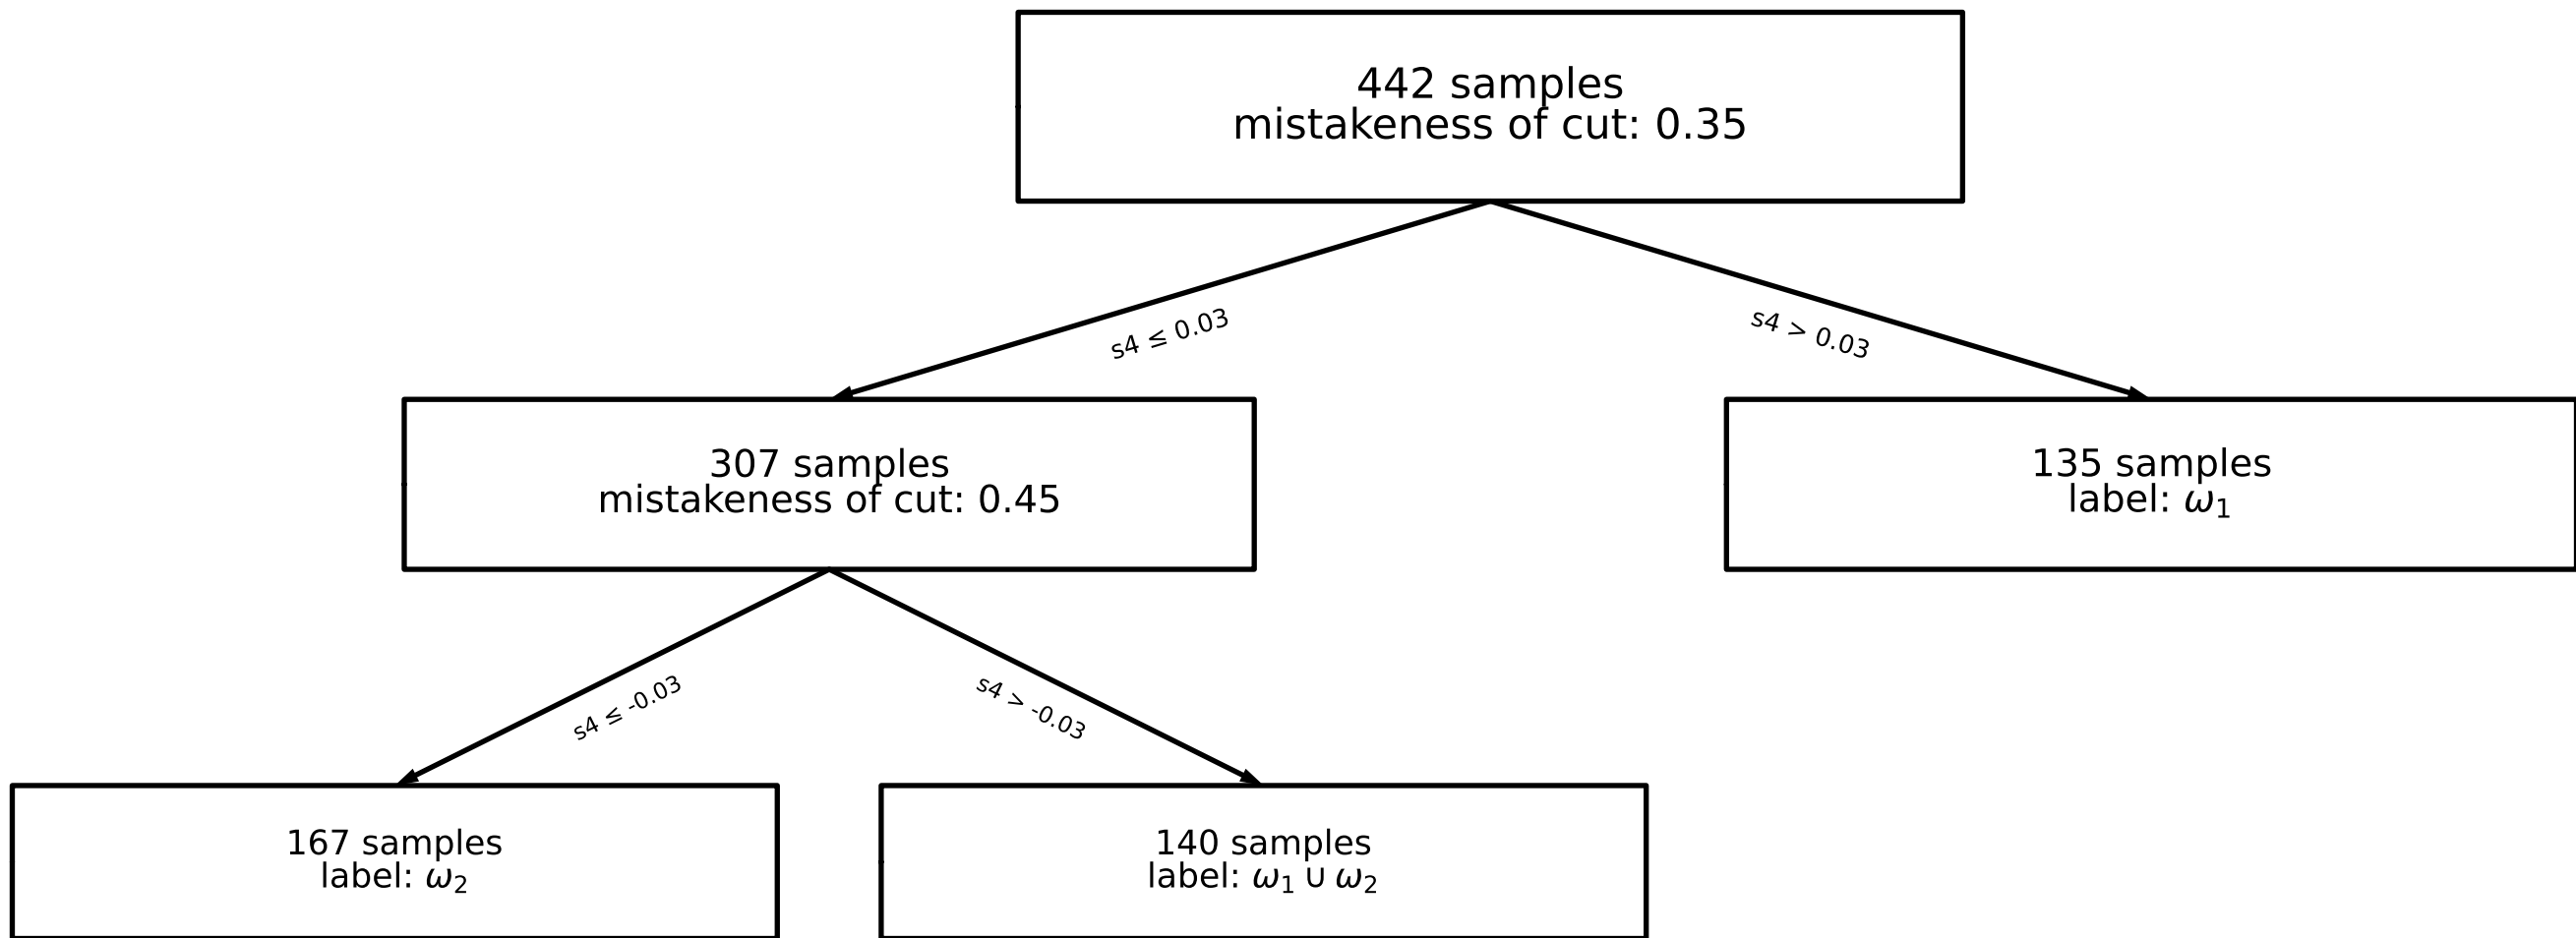

Supplement: supplementary_material [file diagram_1.pdf › iemm/experiments/figs/datasets_evclust/diabetes/diagram_1.pdf]

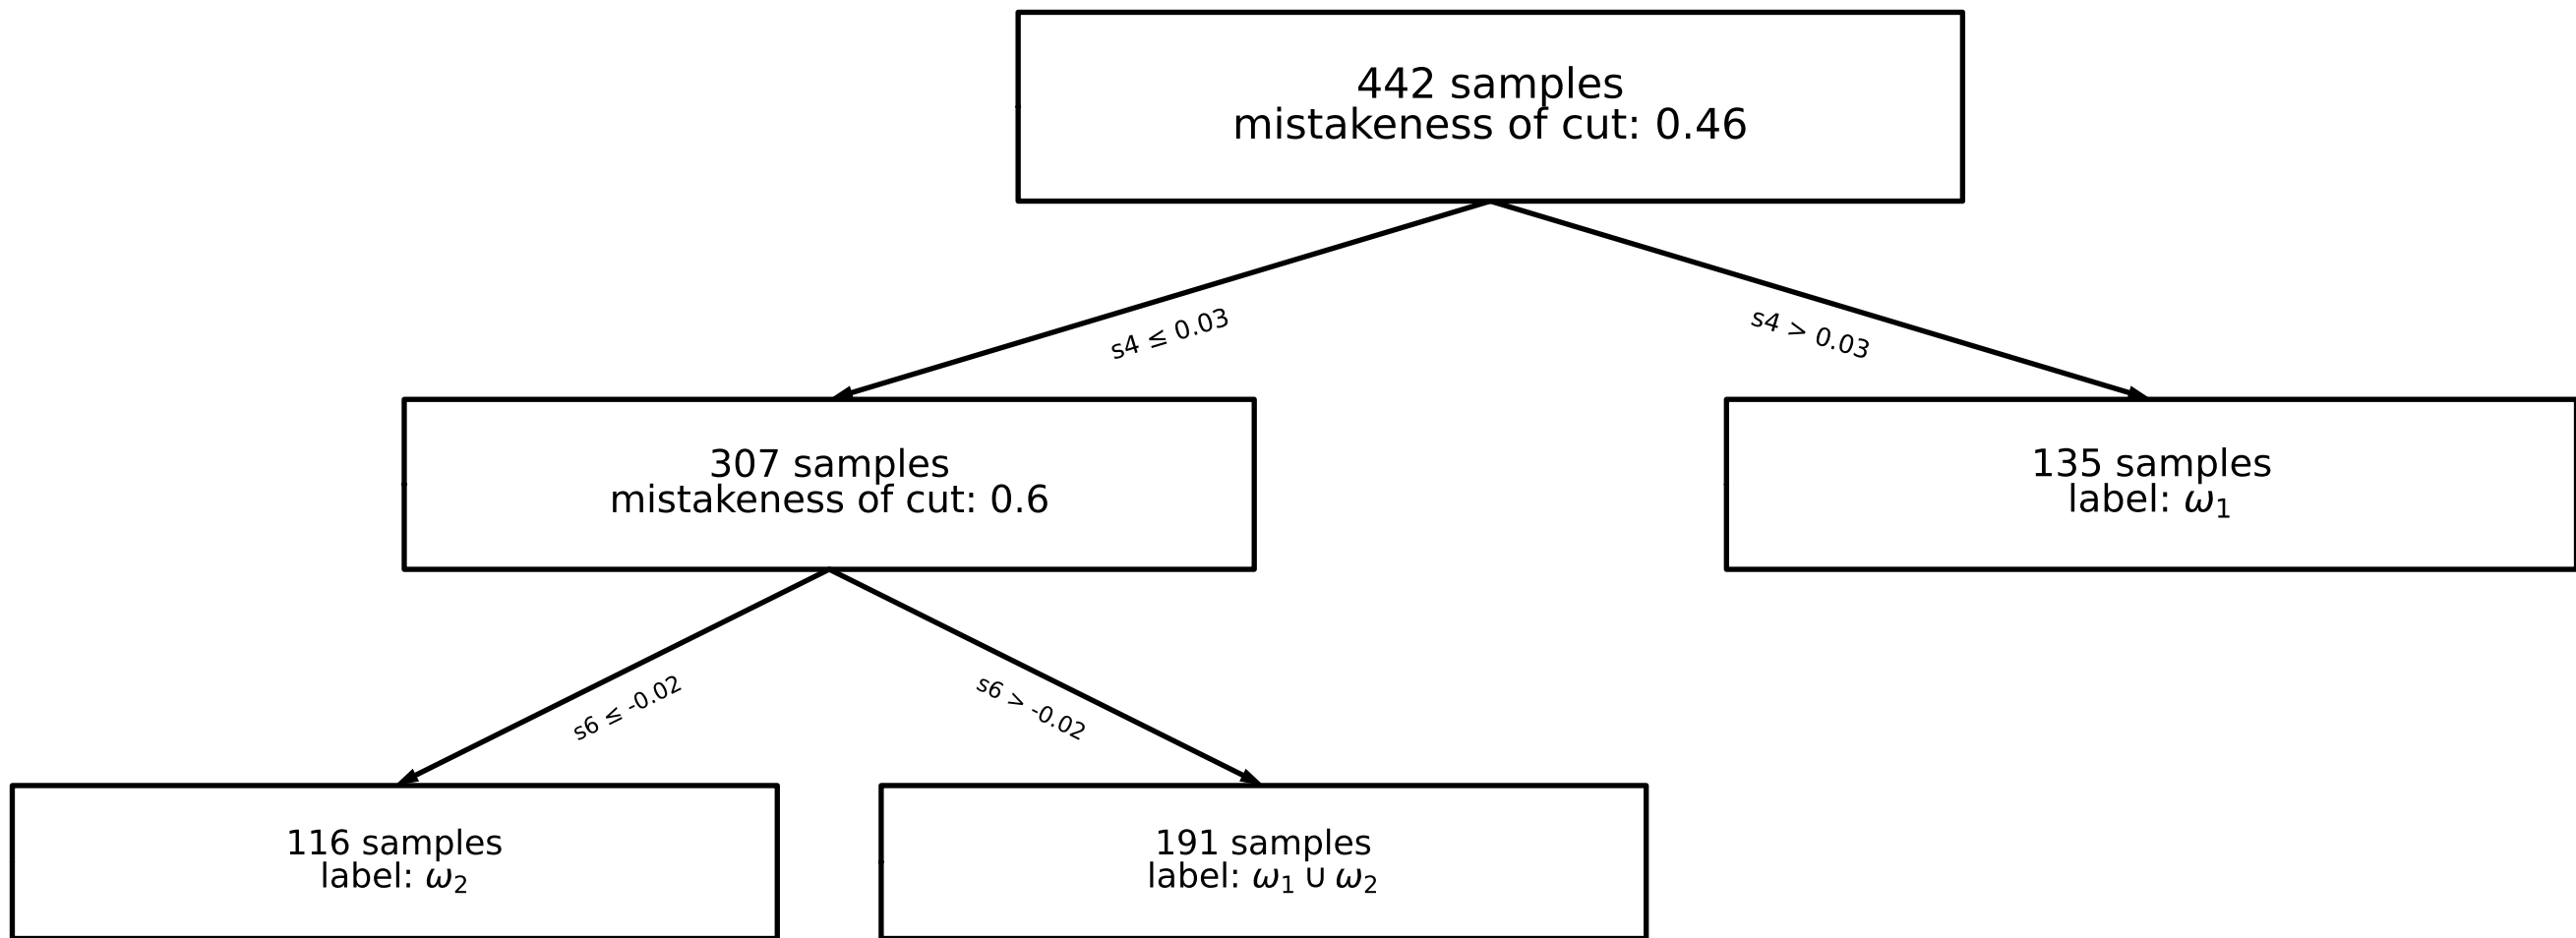

Supplement: supplementary_material [file diagram_inf.pdf › iemm/experiments/figs/datasets_evclust/diabetes/diagram_inf.pdf]

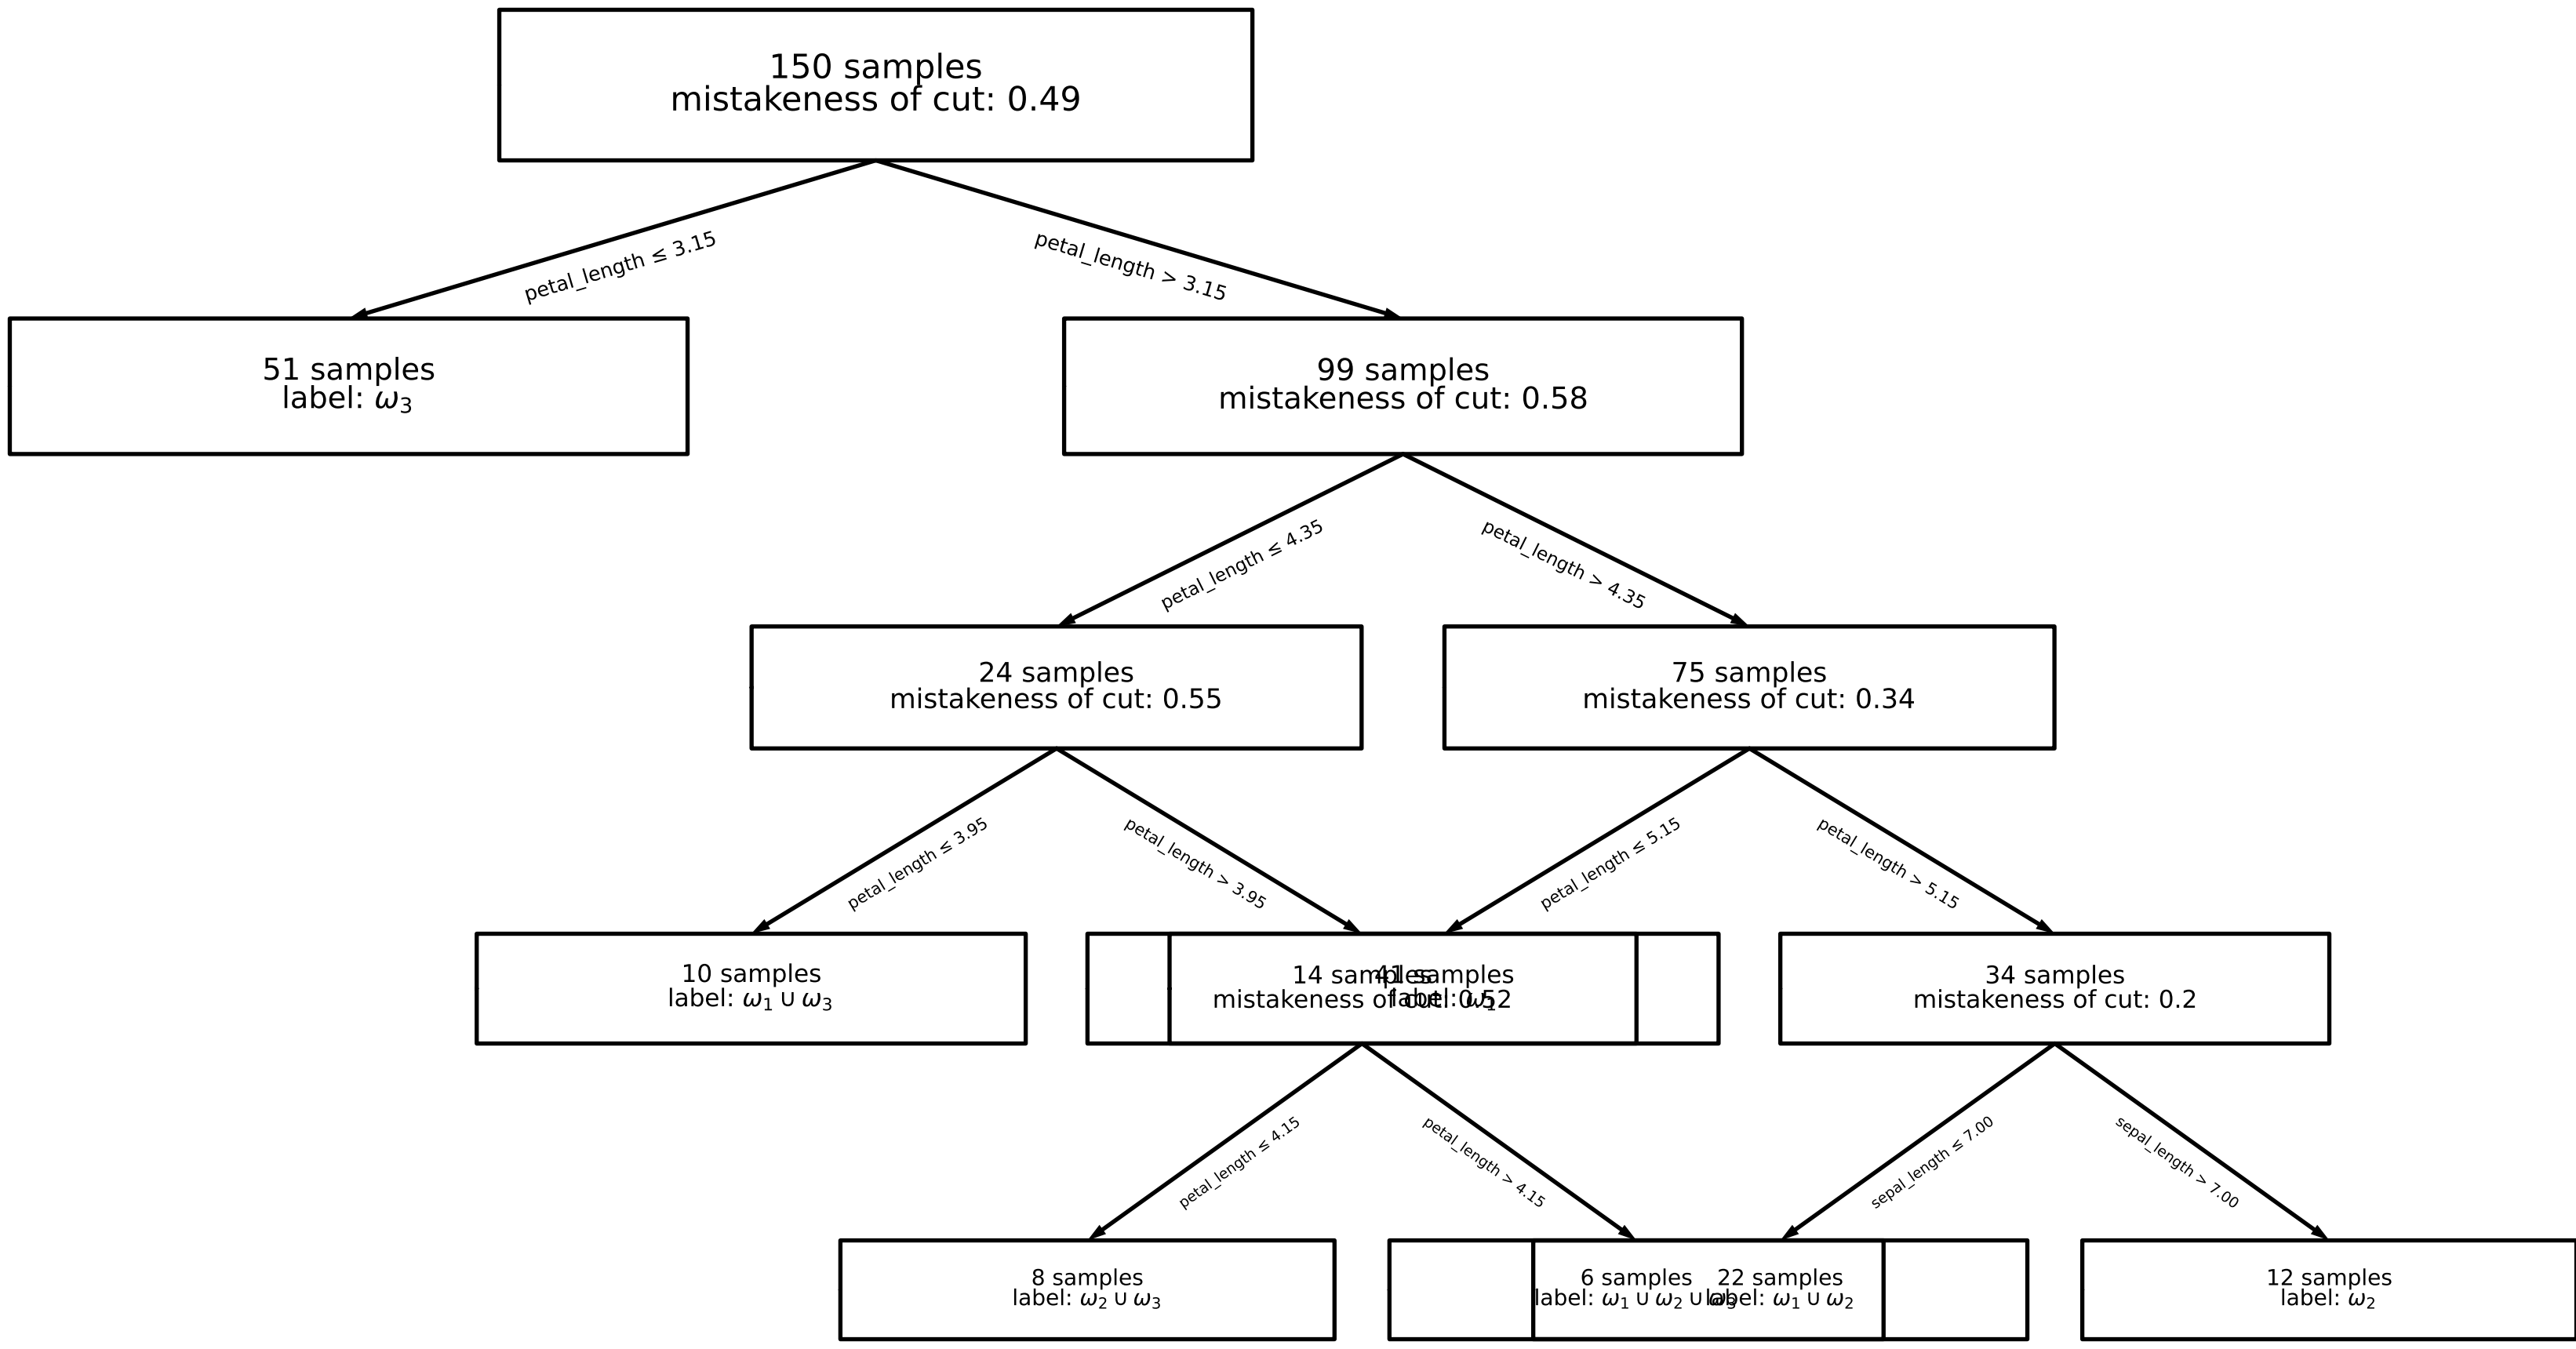

Supplement: supplementary_material [file diagram_-1.pdf › iemm/experiments/figs/datasets_evclust/iris/diagram_-1.pdf]

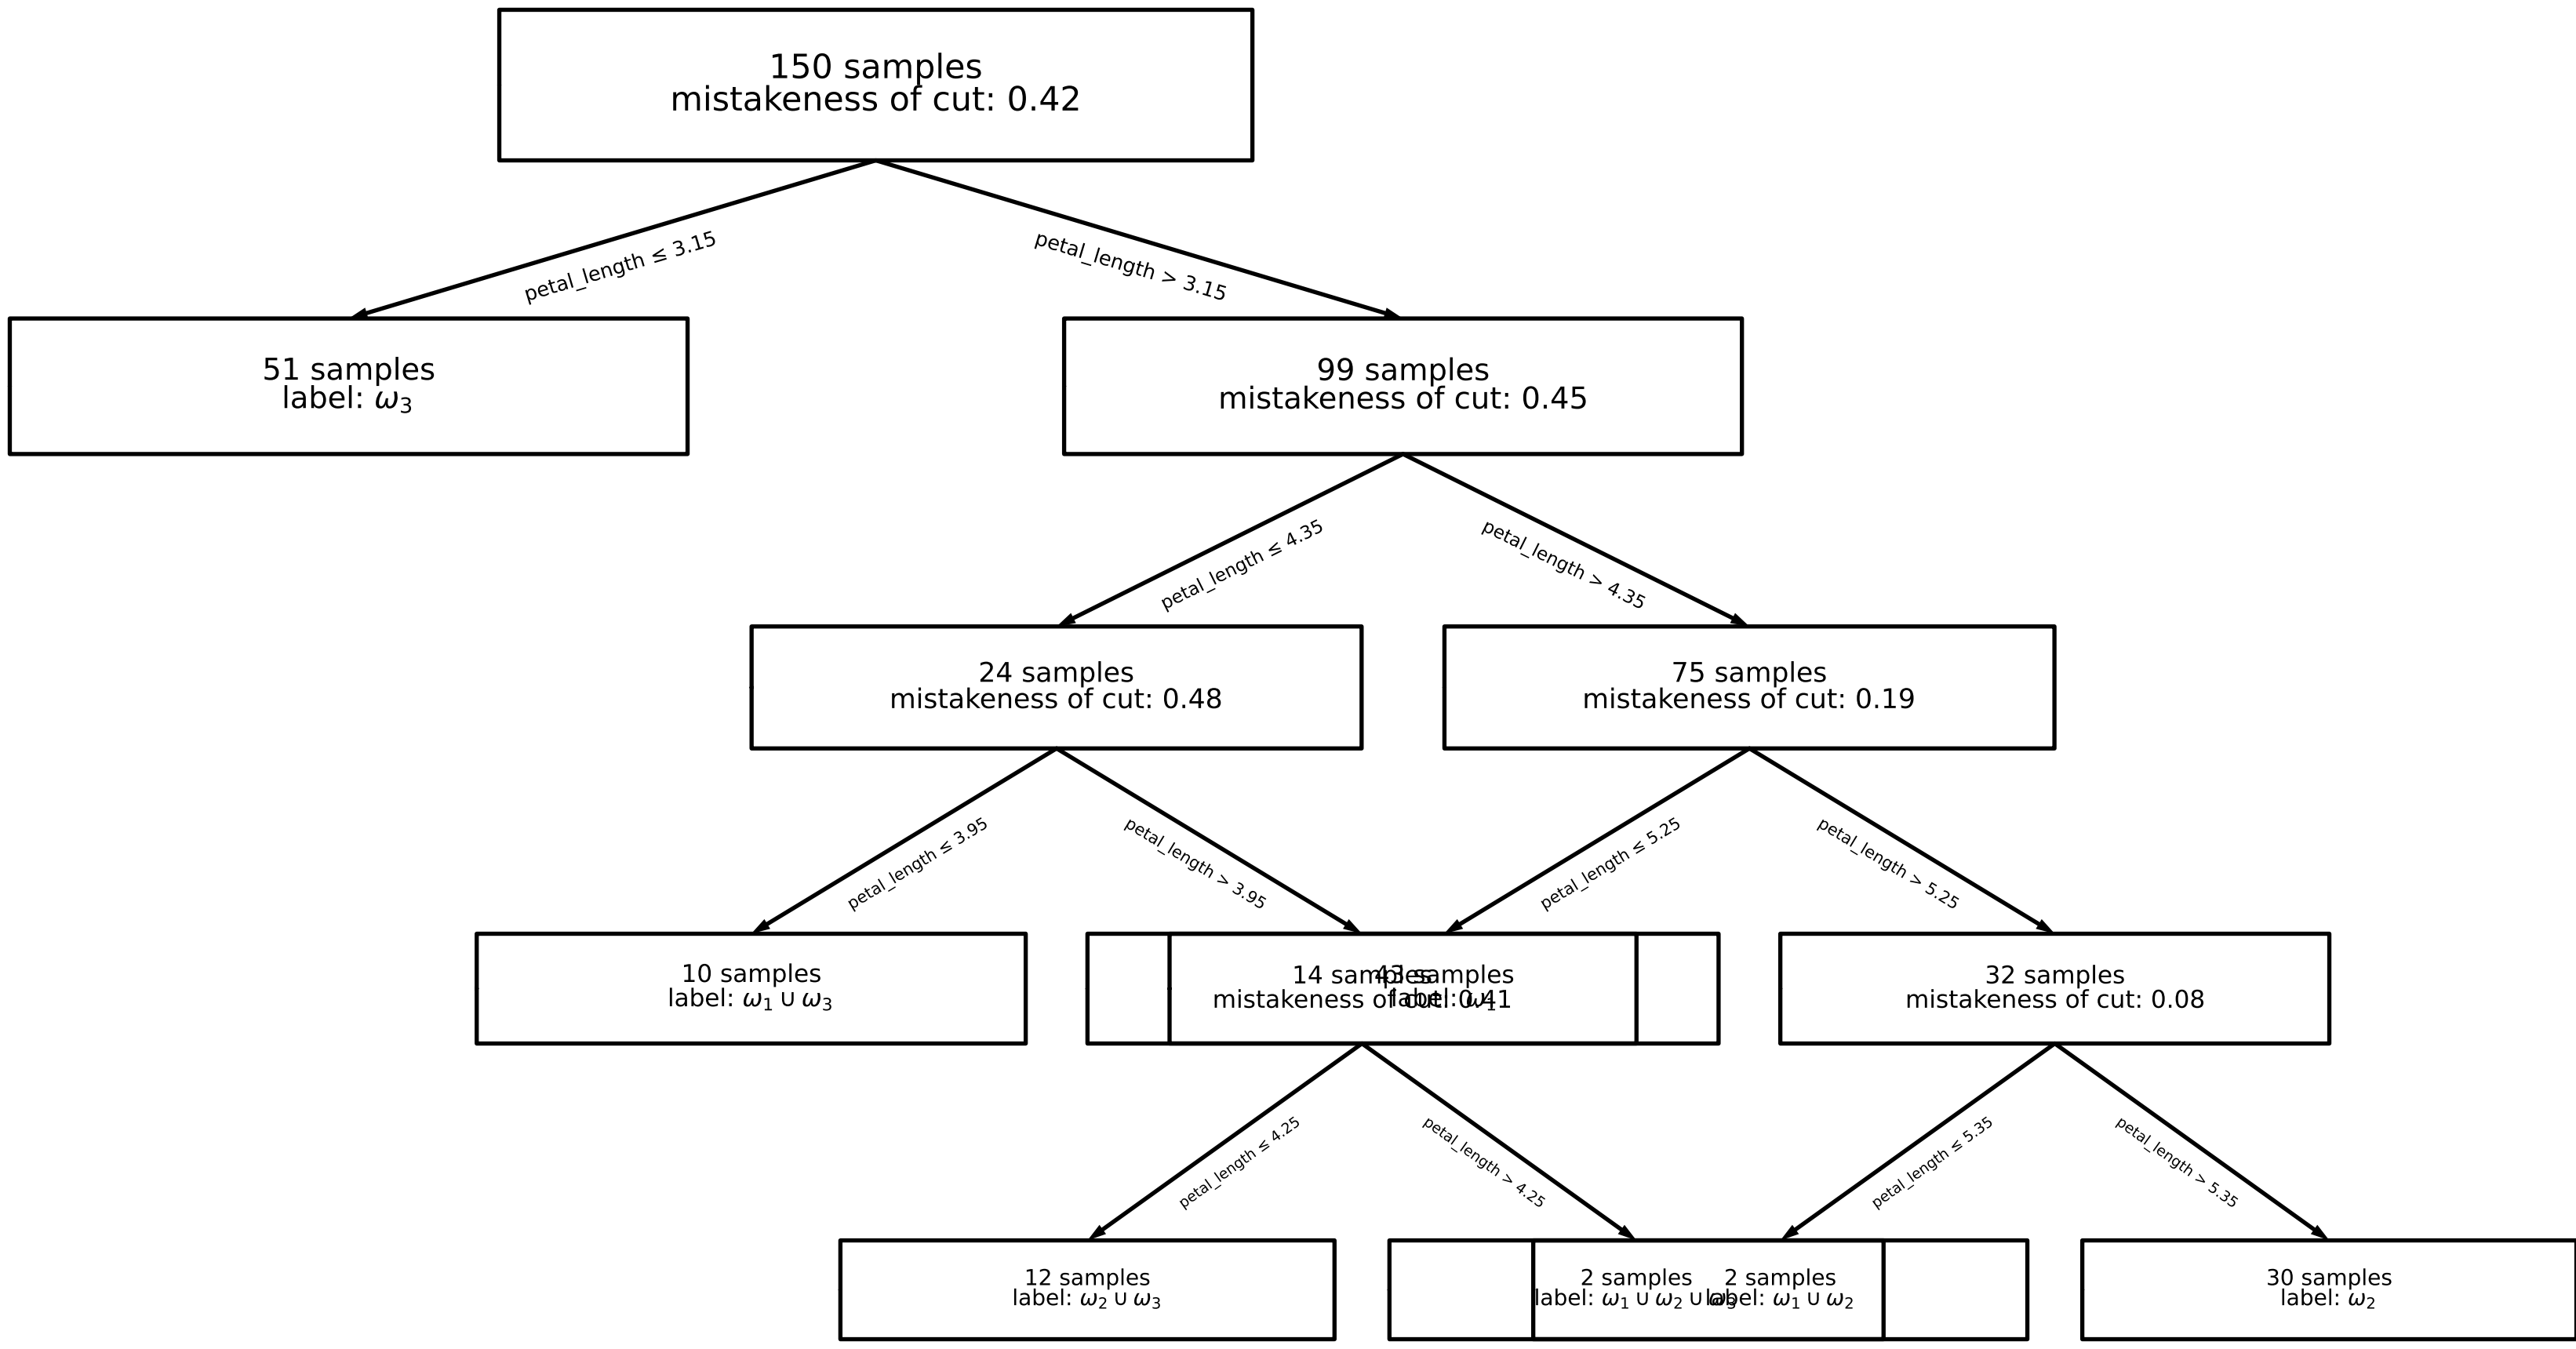

Supplement: supplementary_material [file diagram_-inf.pdf › iemm/experiments/figs/datasets_evclust/iris/diagram_-inf.pdf]

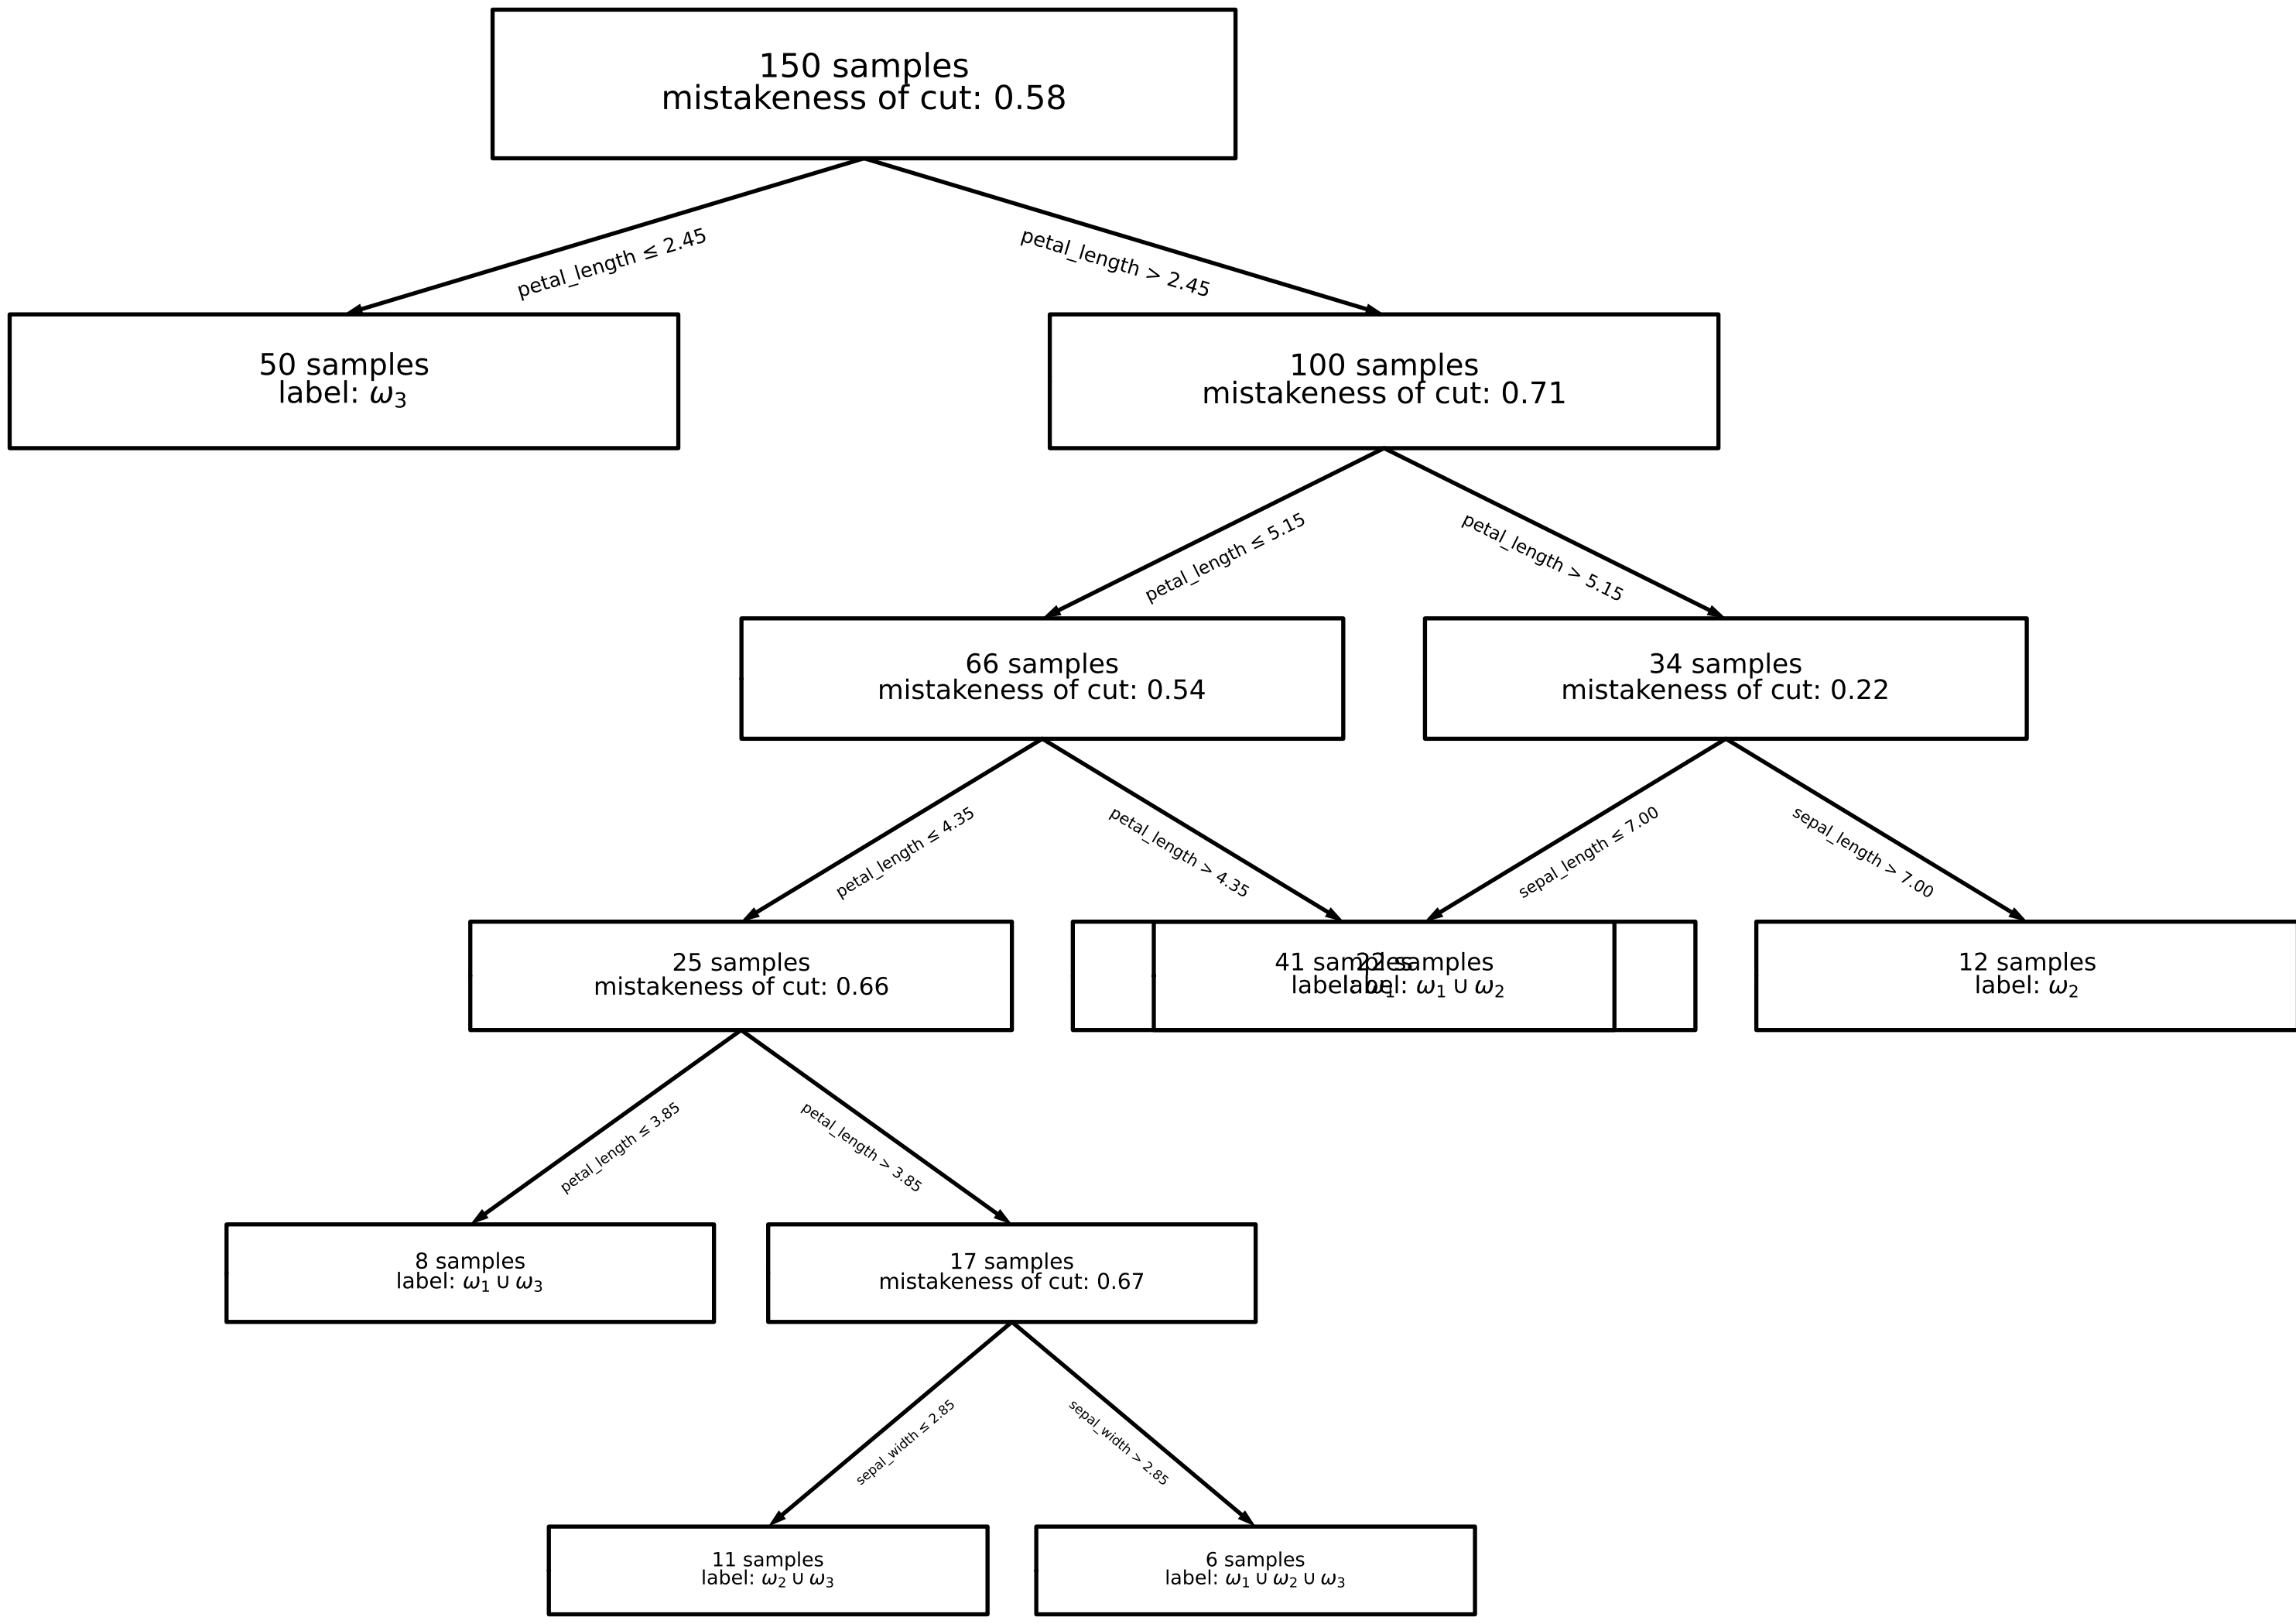

Supplement: supplementary_material [file diagram_0.pdf › iemm/experiments/figs/datasets_evclust/iris/diagram_0.pdf]

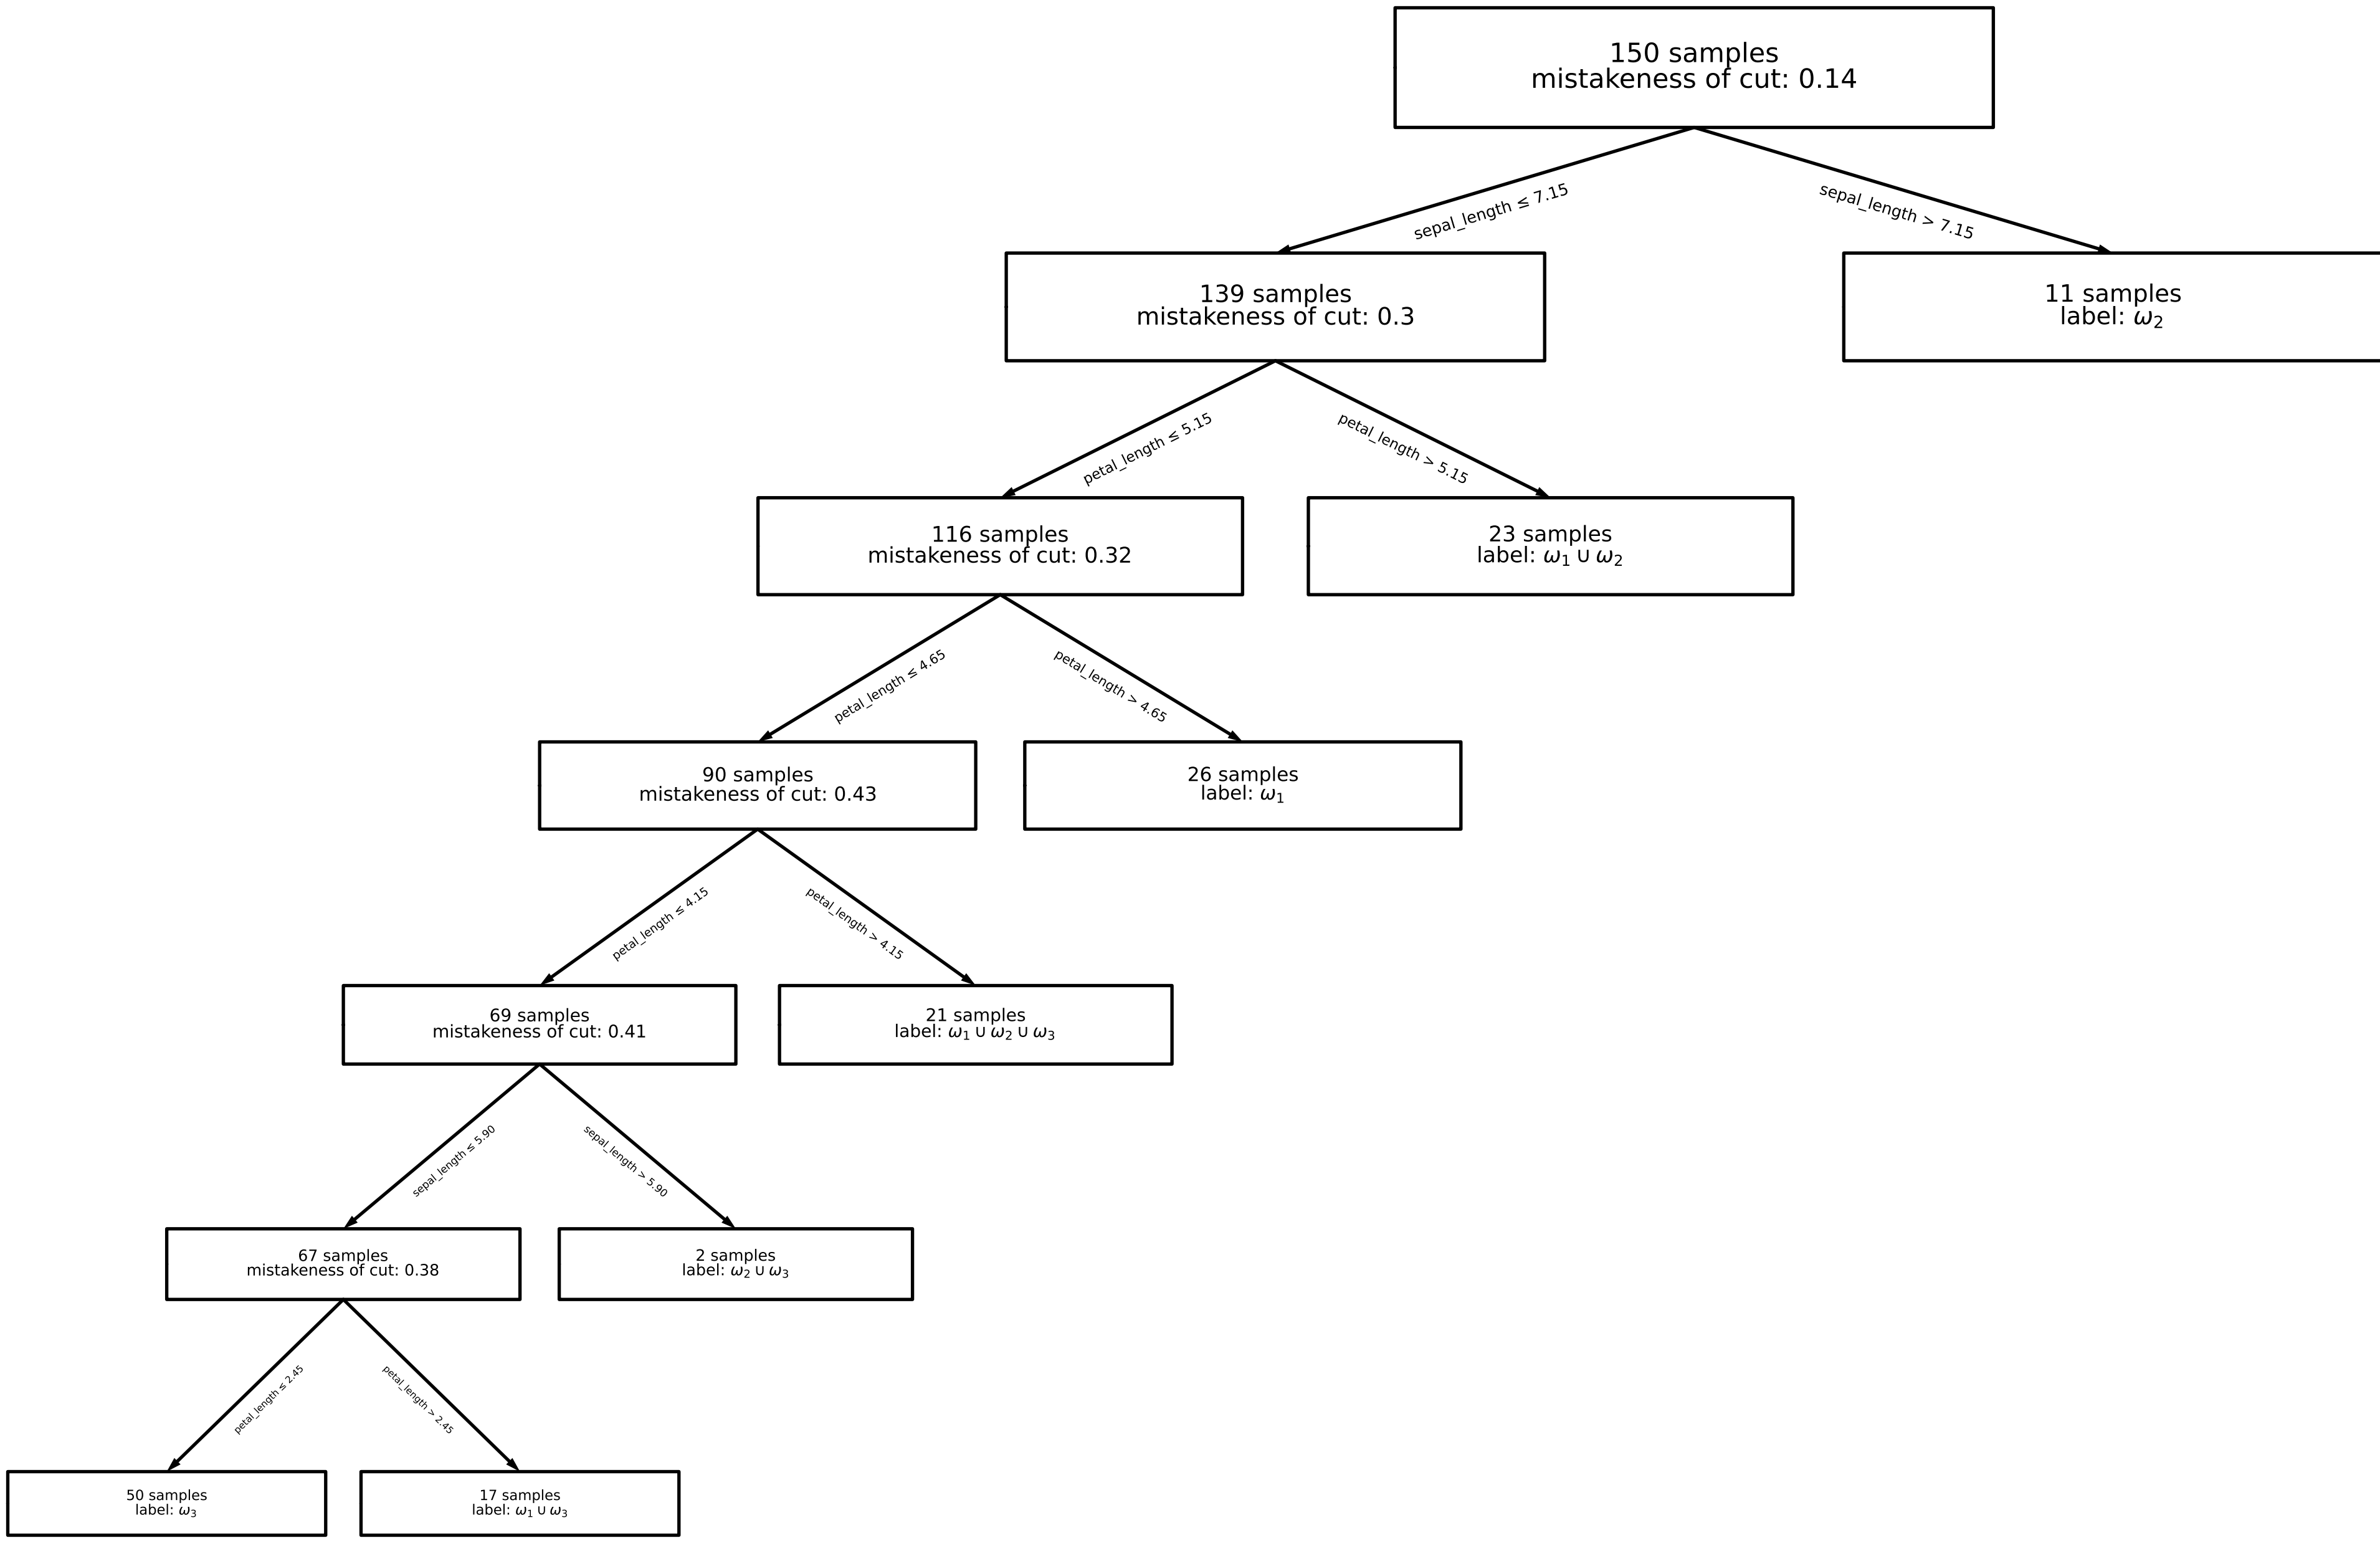

Supplement: supplementary_material [file diagram_1.pdf › iemm/experiments/figs/datasets_evclust/iris/diagram_1.pdf]

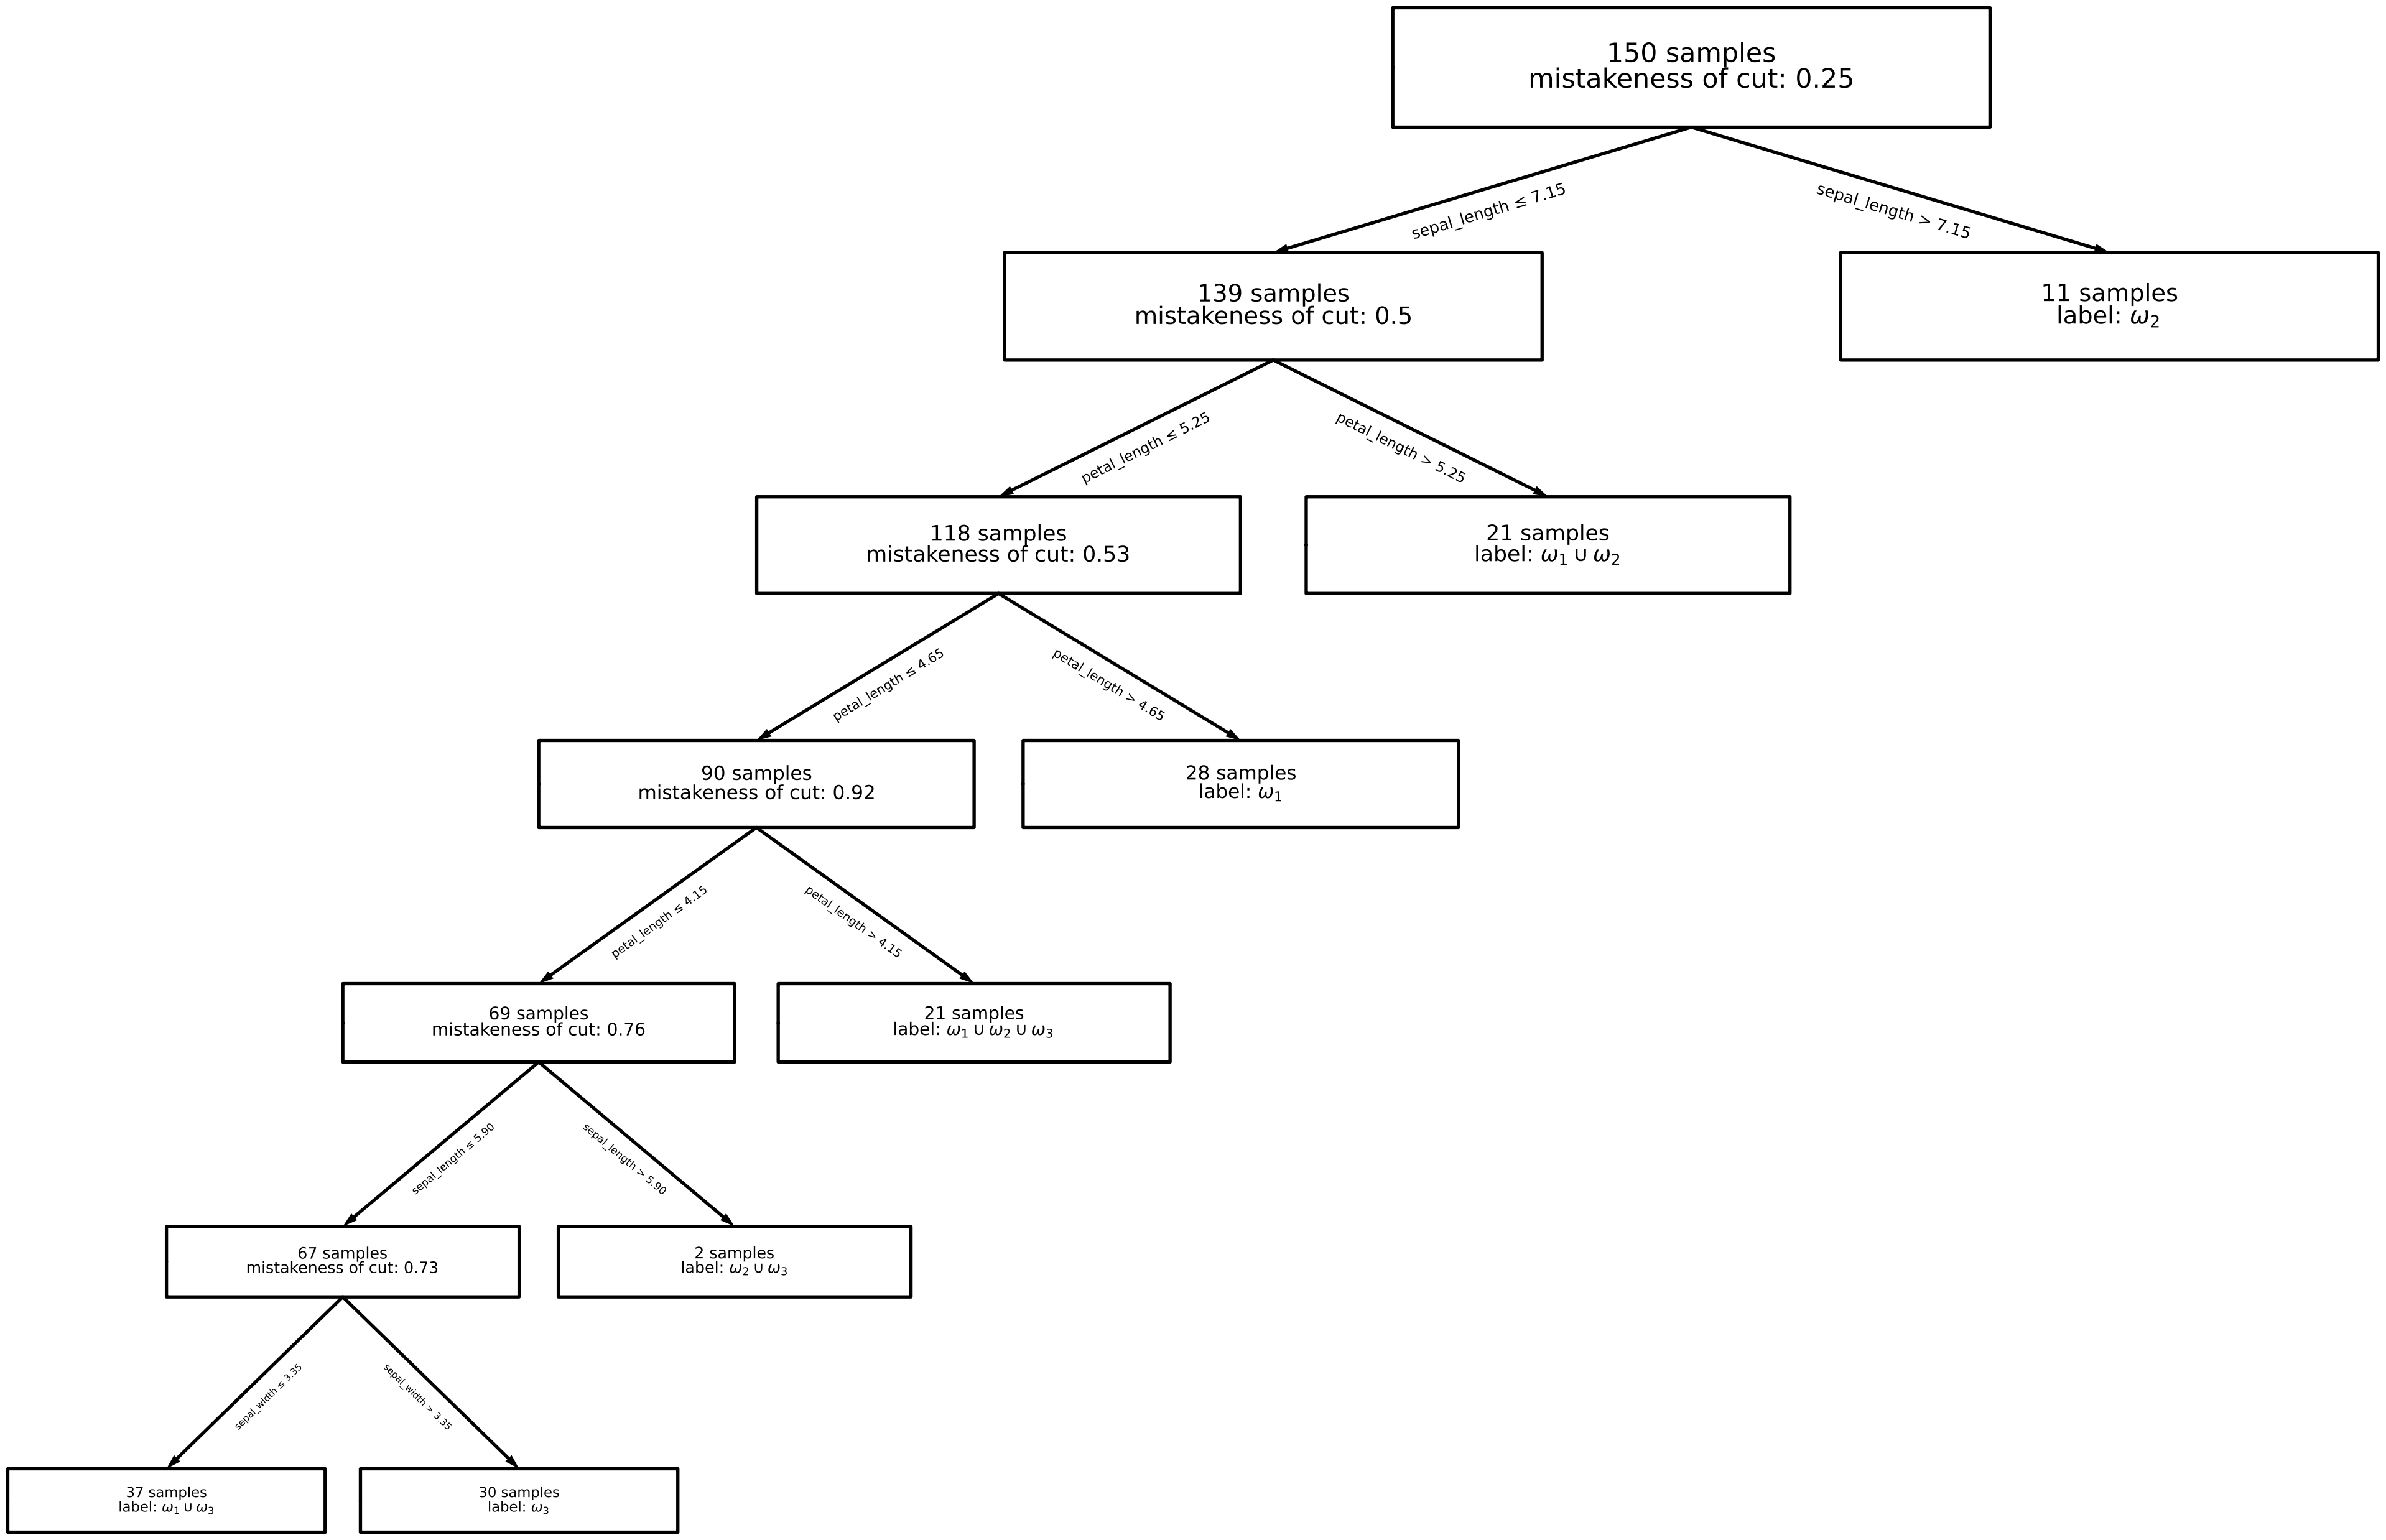

Supplement: supplementary_material [file diagram_inf.pdf › iemm/experiments/figs/datasets_evclust/iris/diagram_inf.pdf]

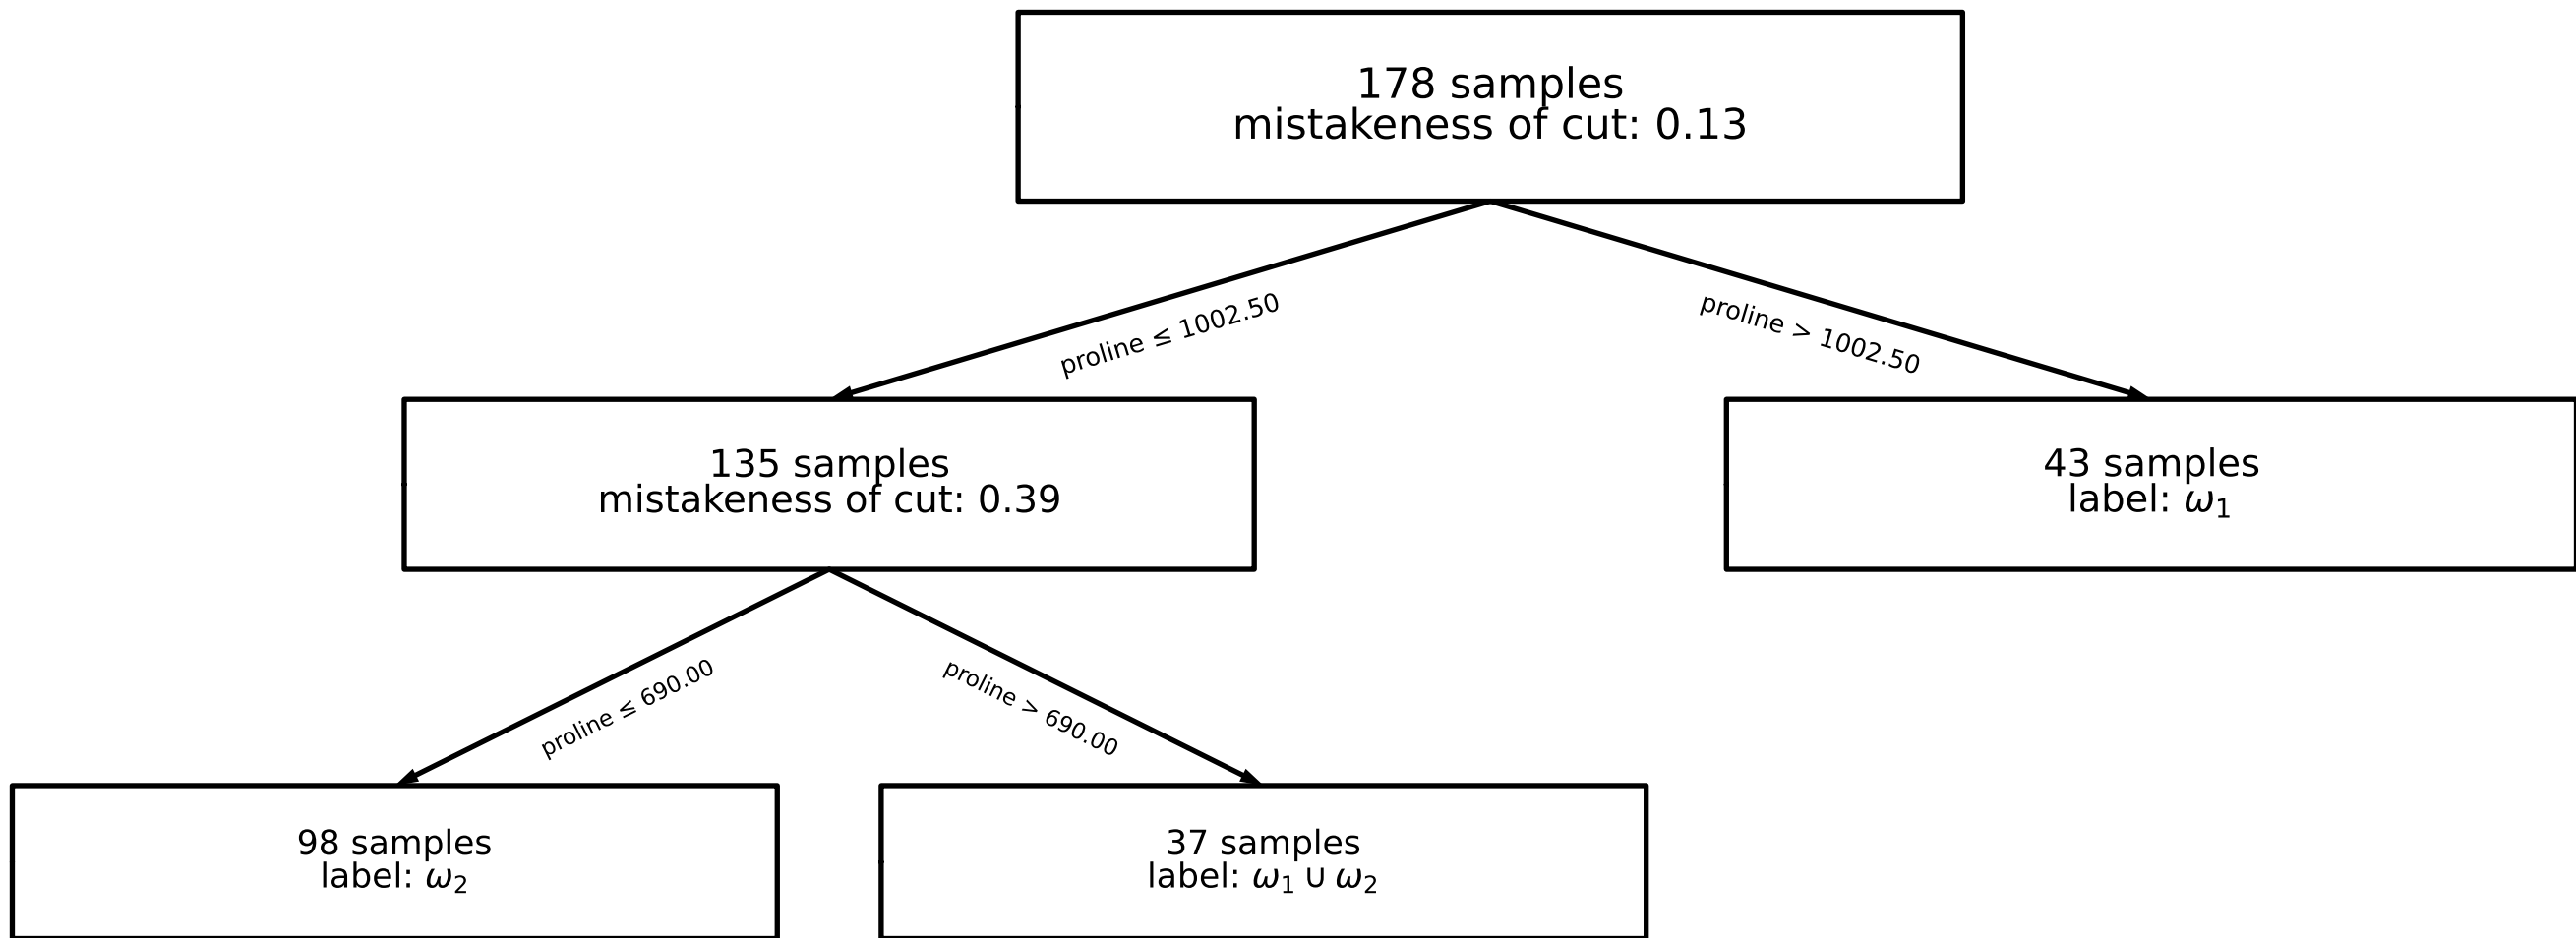

Supplement: supplementary_material [file diagram_1.pdf › iemm/experiments/figs/datasets_evclust/wine/diagram_1.pdf]

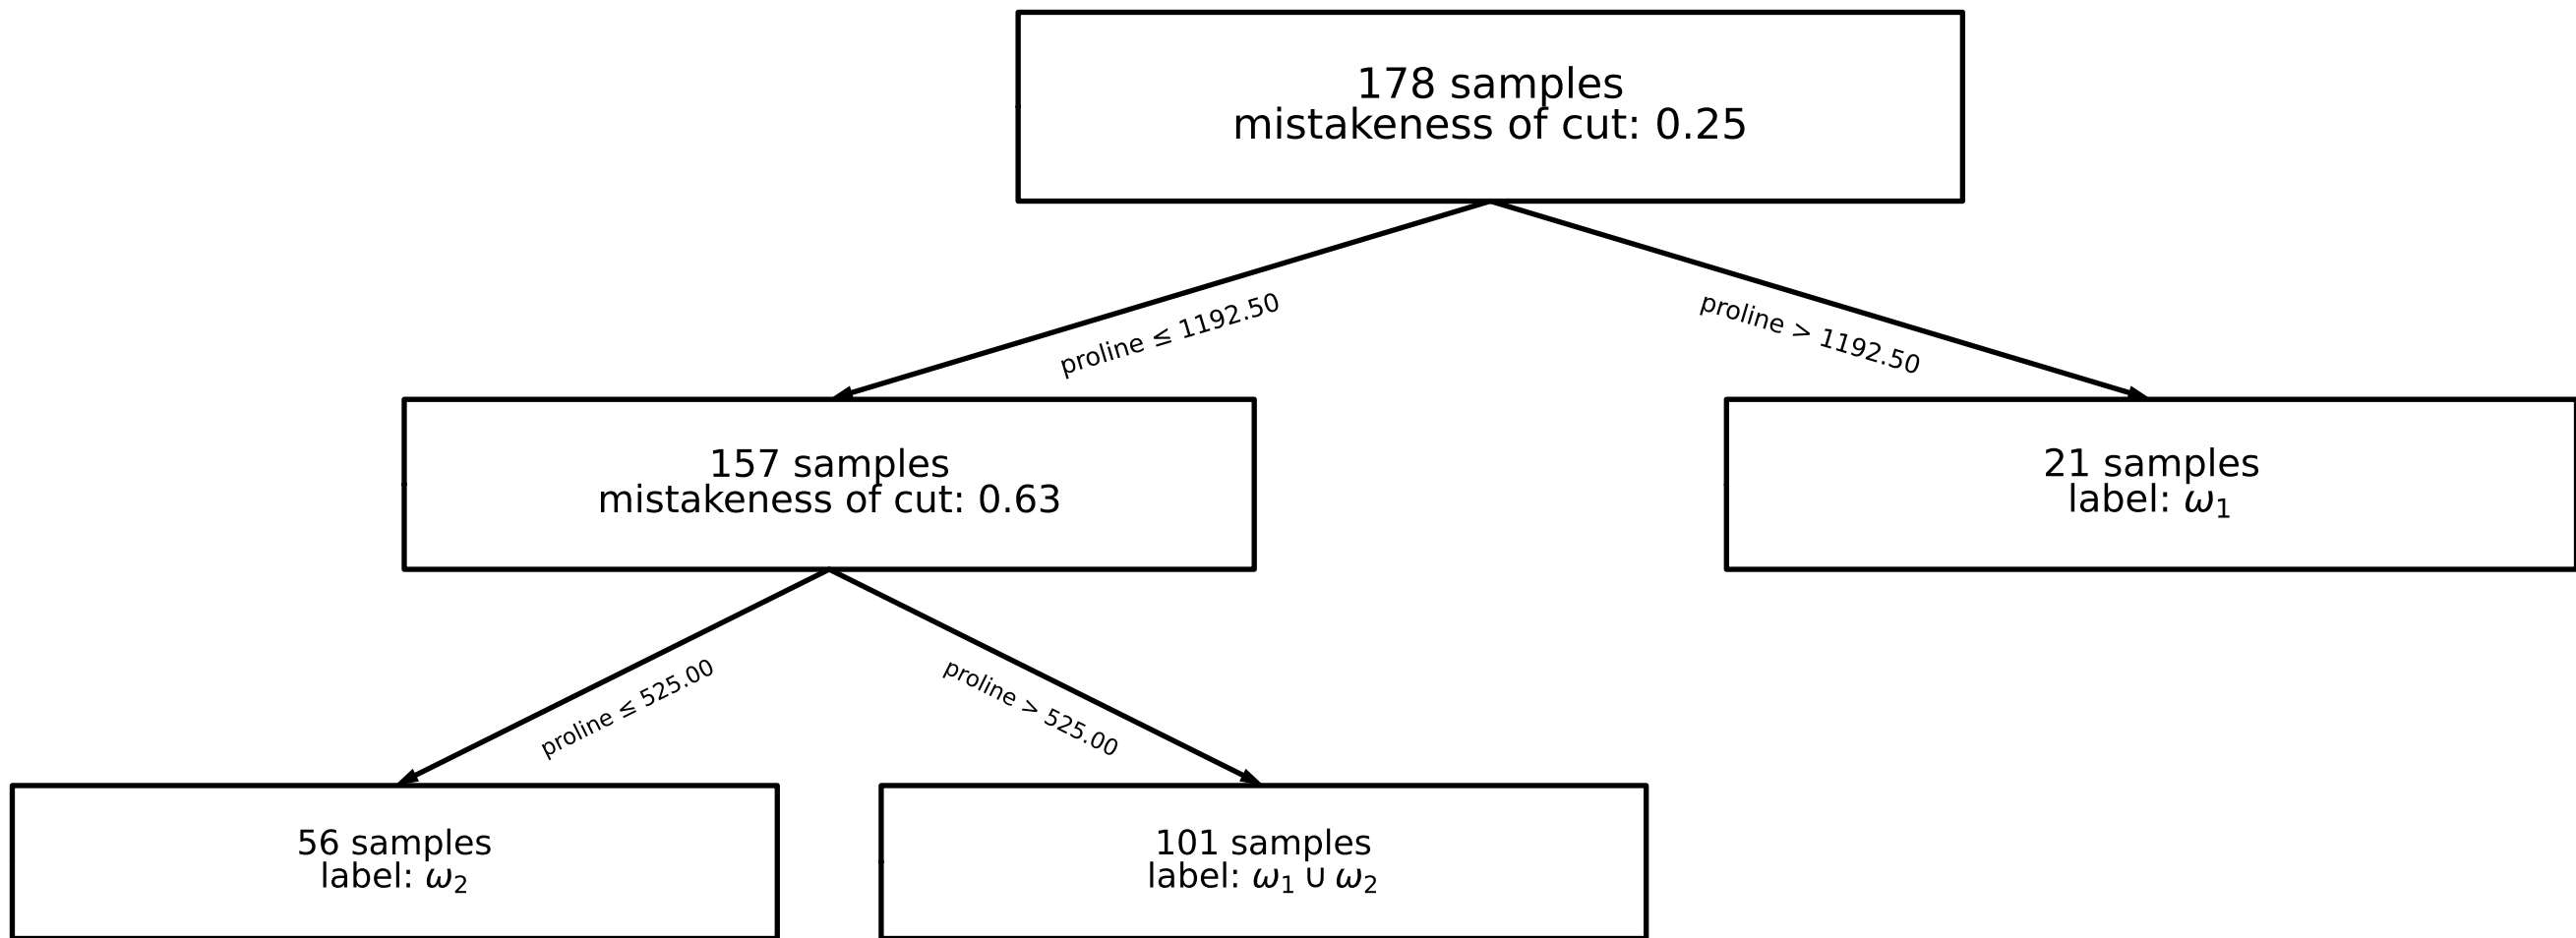

Supplement: supplementary_material [file diagram_inf.pdf › iemm/experiments/figs/datasets_evclust/wine/diagram_inf.pdf]



Supplement: supplementary_material [file diagram_simple_0.pdf › iemm/experiments/figs/diagram_simple_0.pdf]

dataset easy

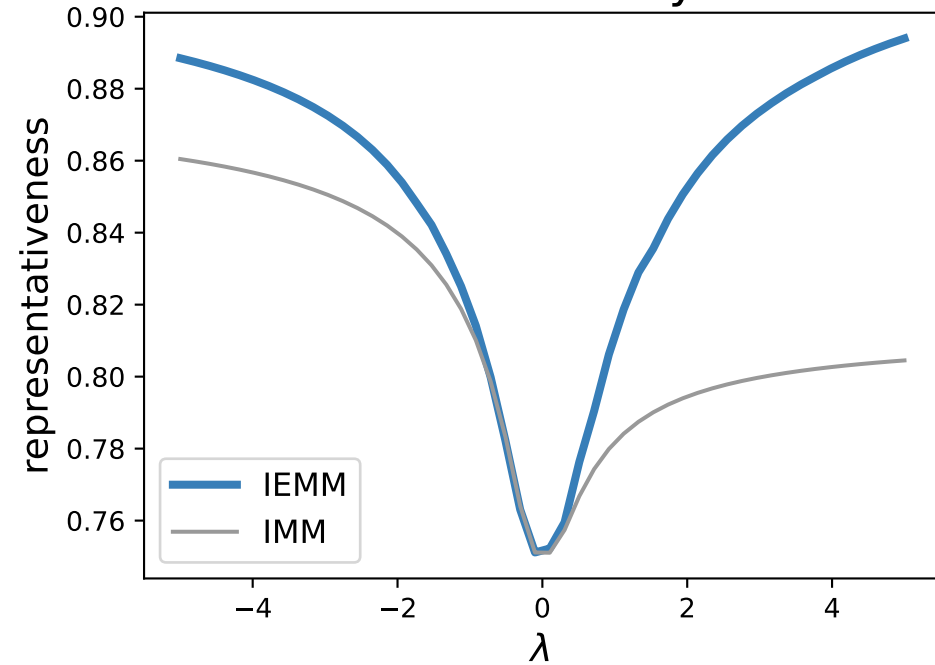

dataset quasi-bayesian

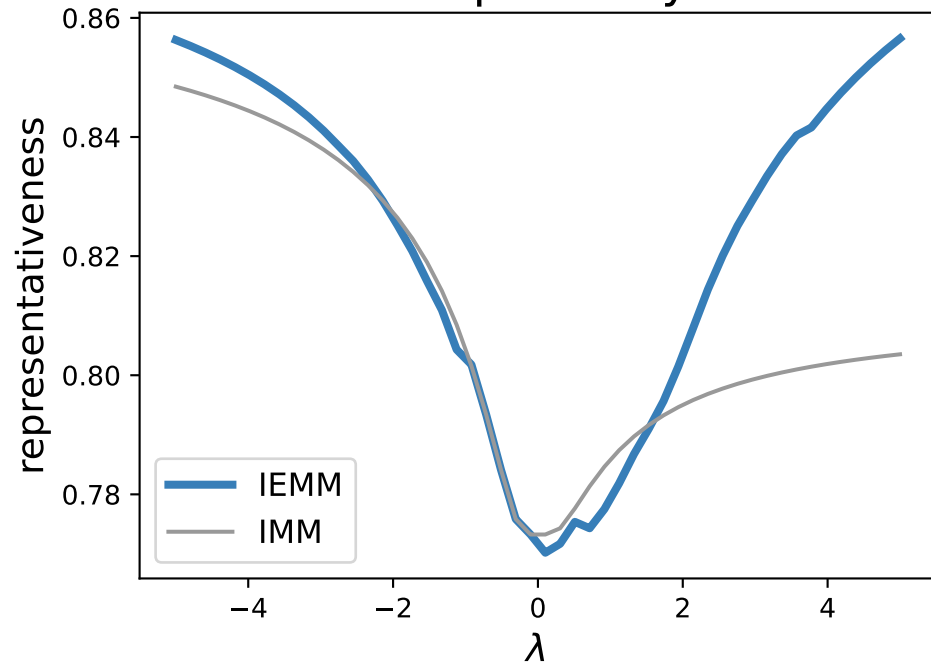

dataset full

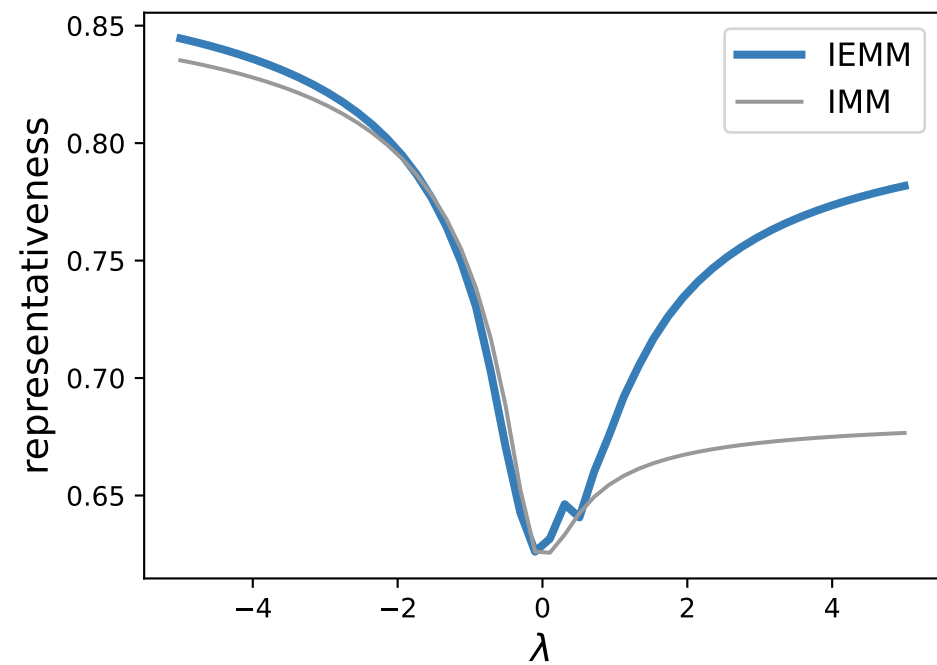

Supplement: supplementary_material [file synth_results_all_results.pdf › iemm/experiments/figs/synth_results_all_results.pdf]

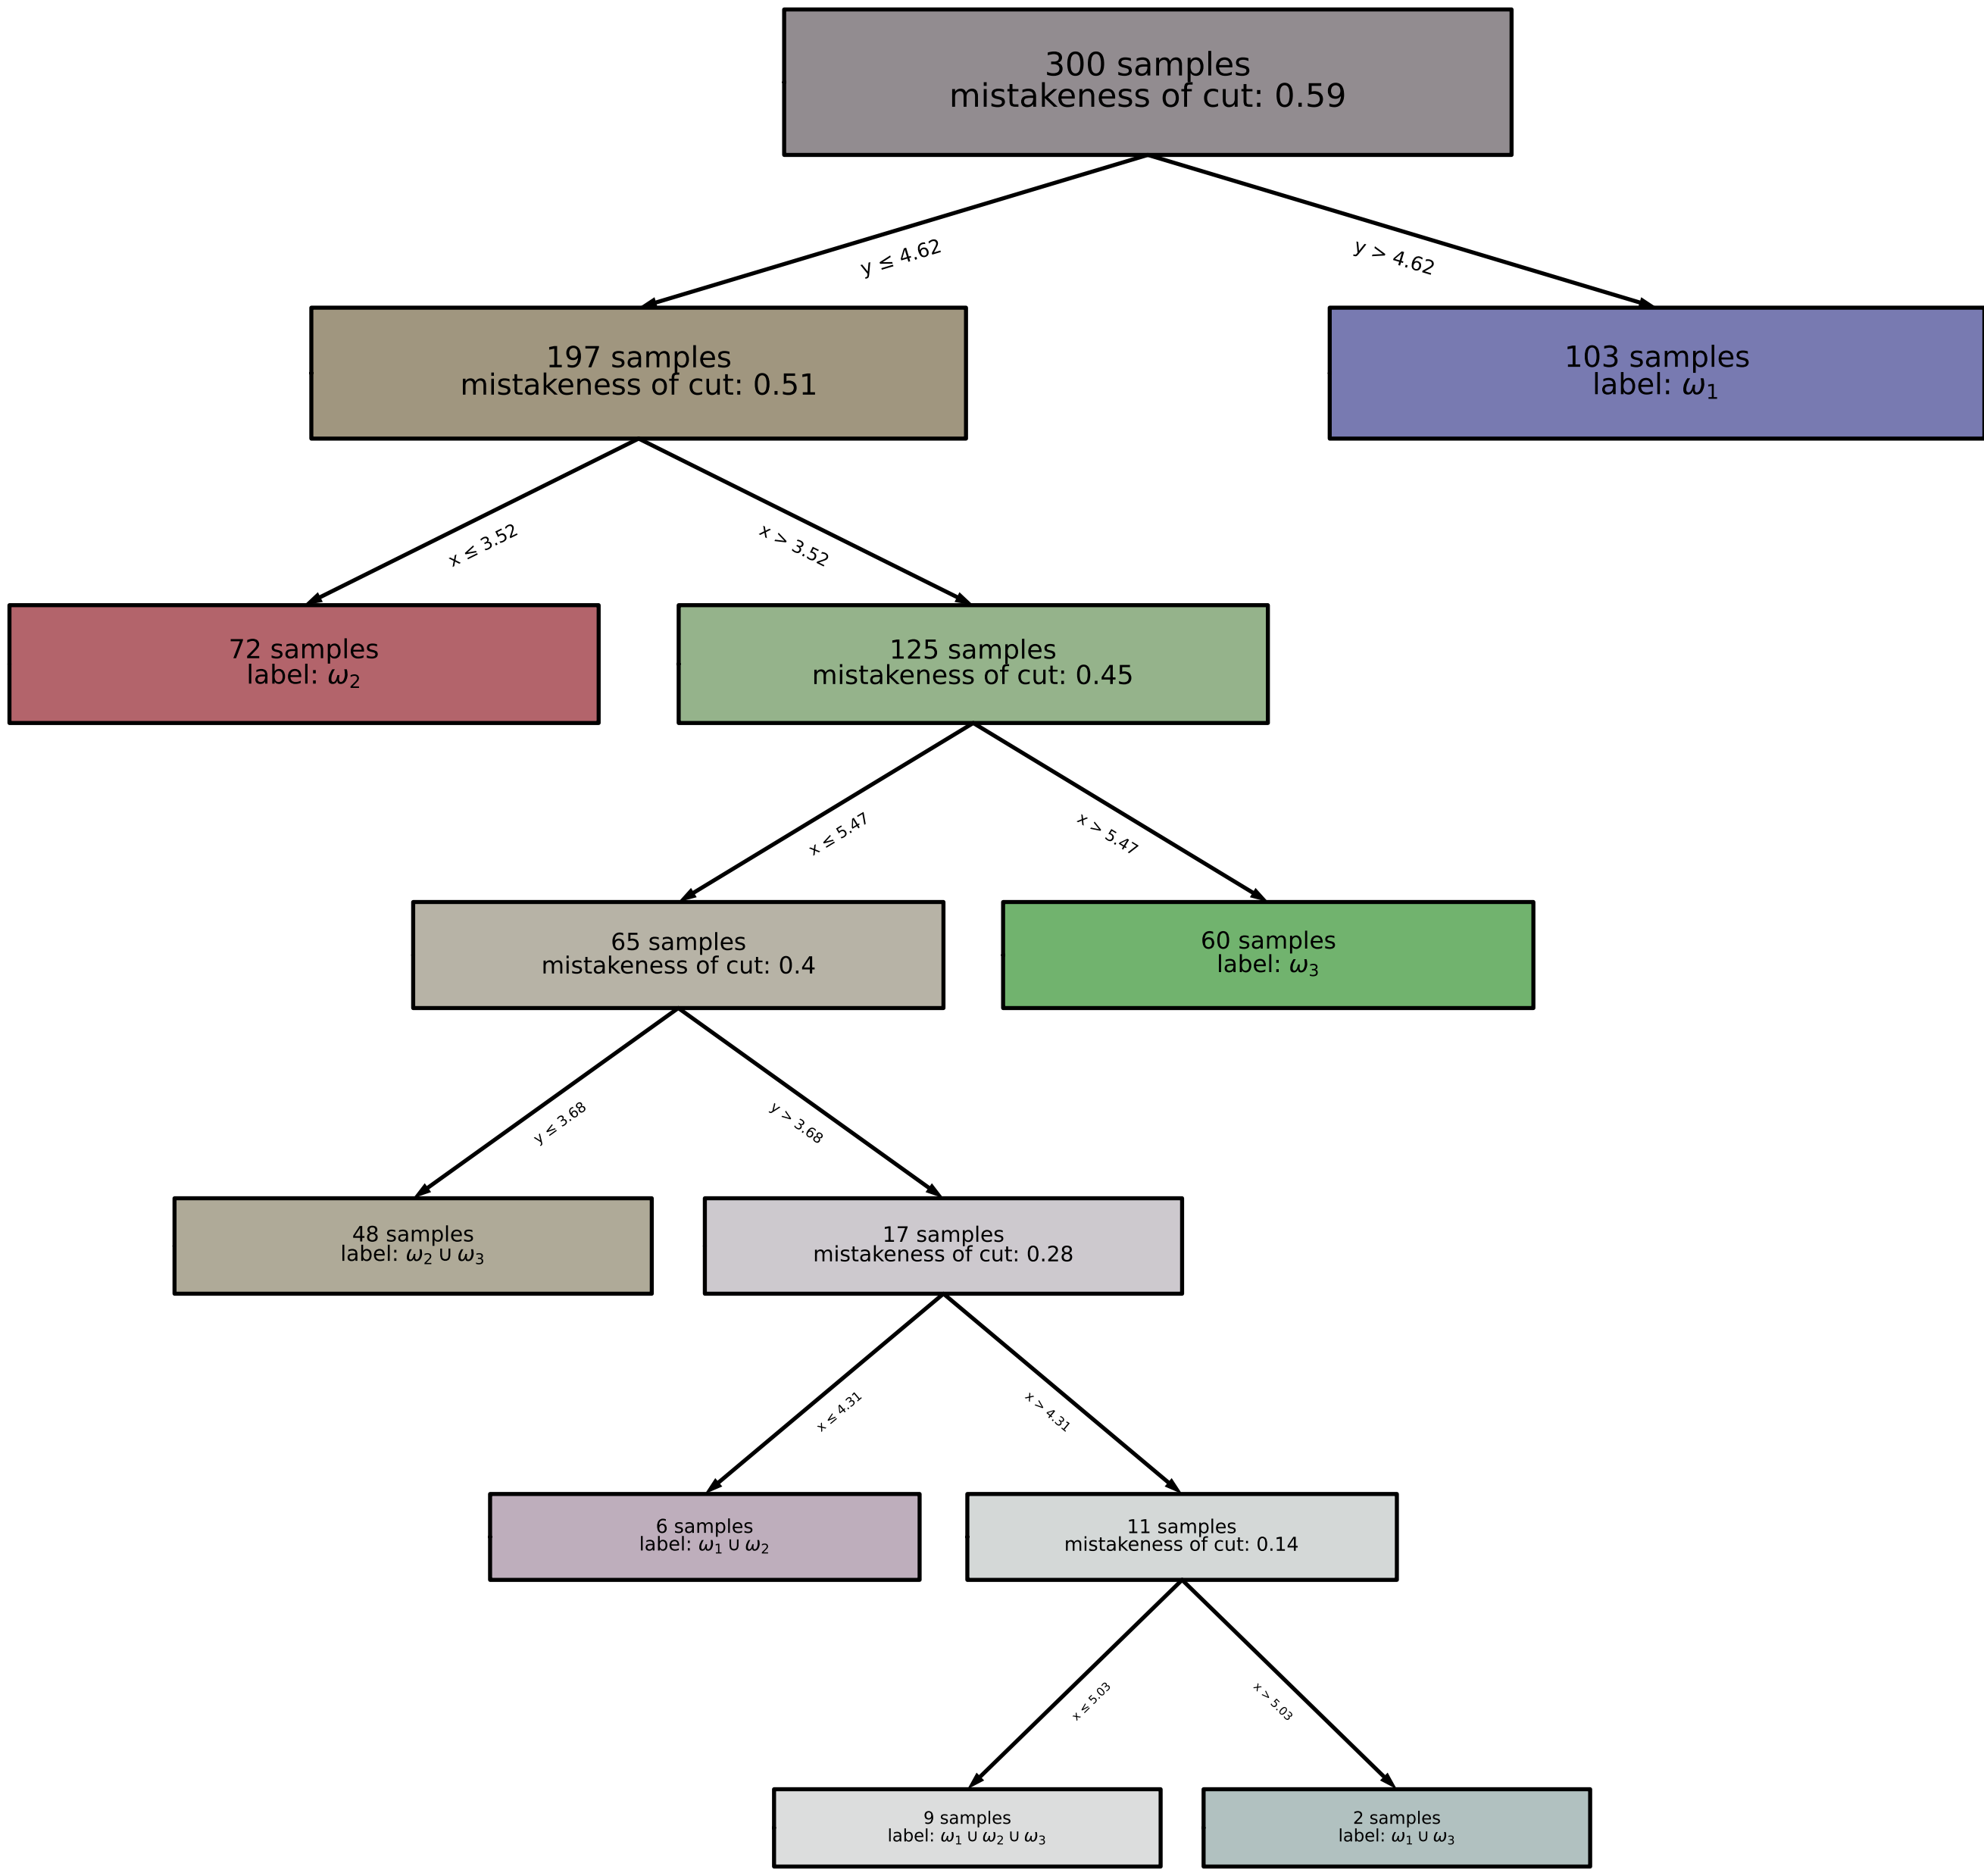

Supplement: supplementary_material [file diagram_-1.pdf › iemm/experiments/figs/three_clusters2D_synth/full/diagram_-1.pdf]

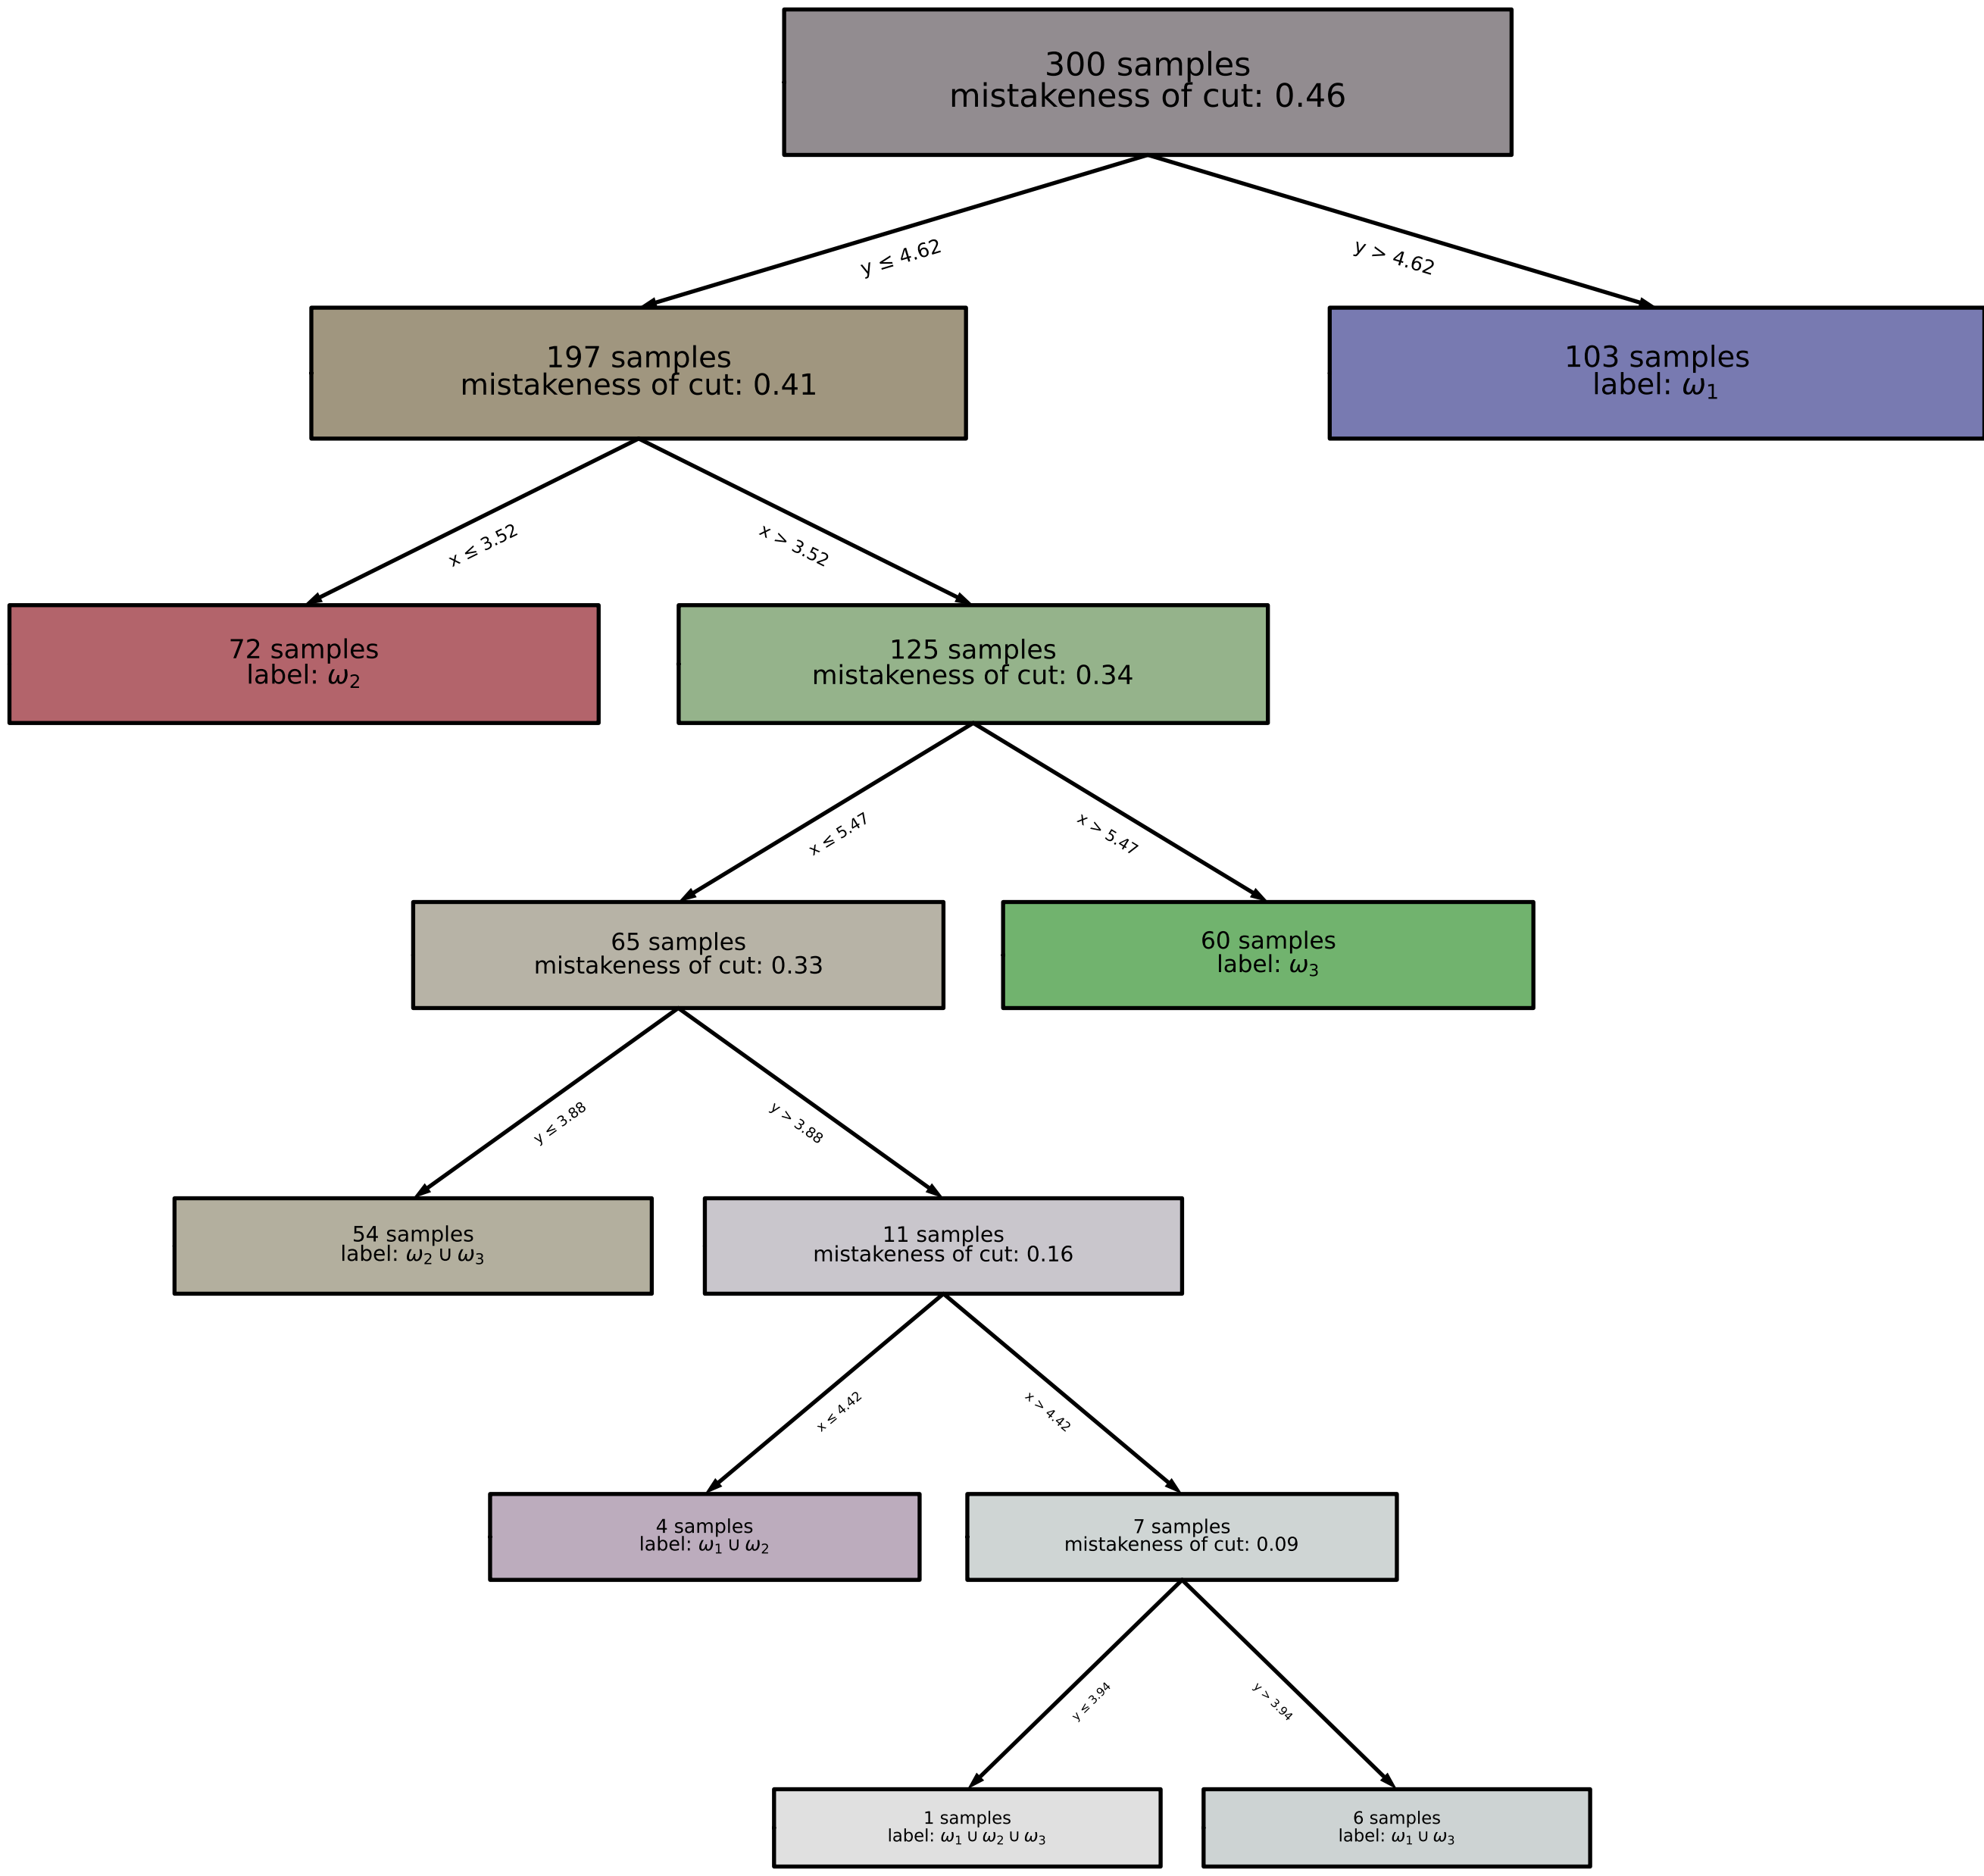

Supplement: supplementary_material [file diagram_-inf.pdf › iemm/experiments/figs/three_clusters2D_synth/full/diagram_-inf.pdf]

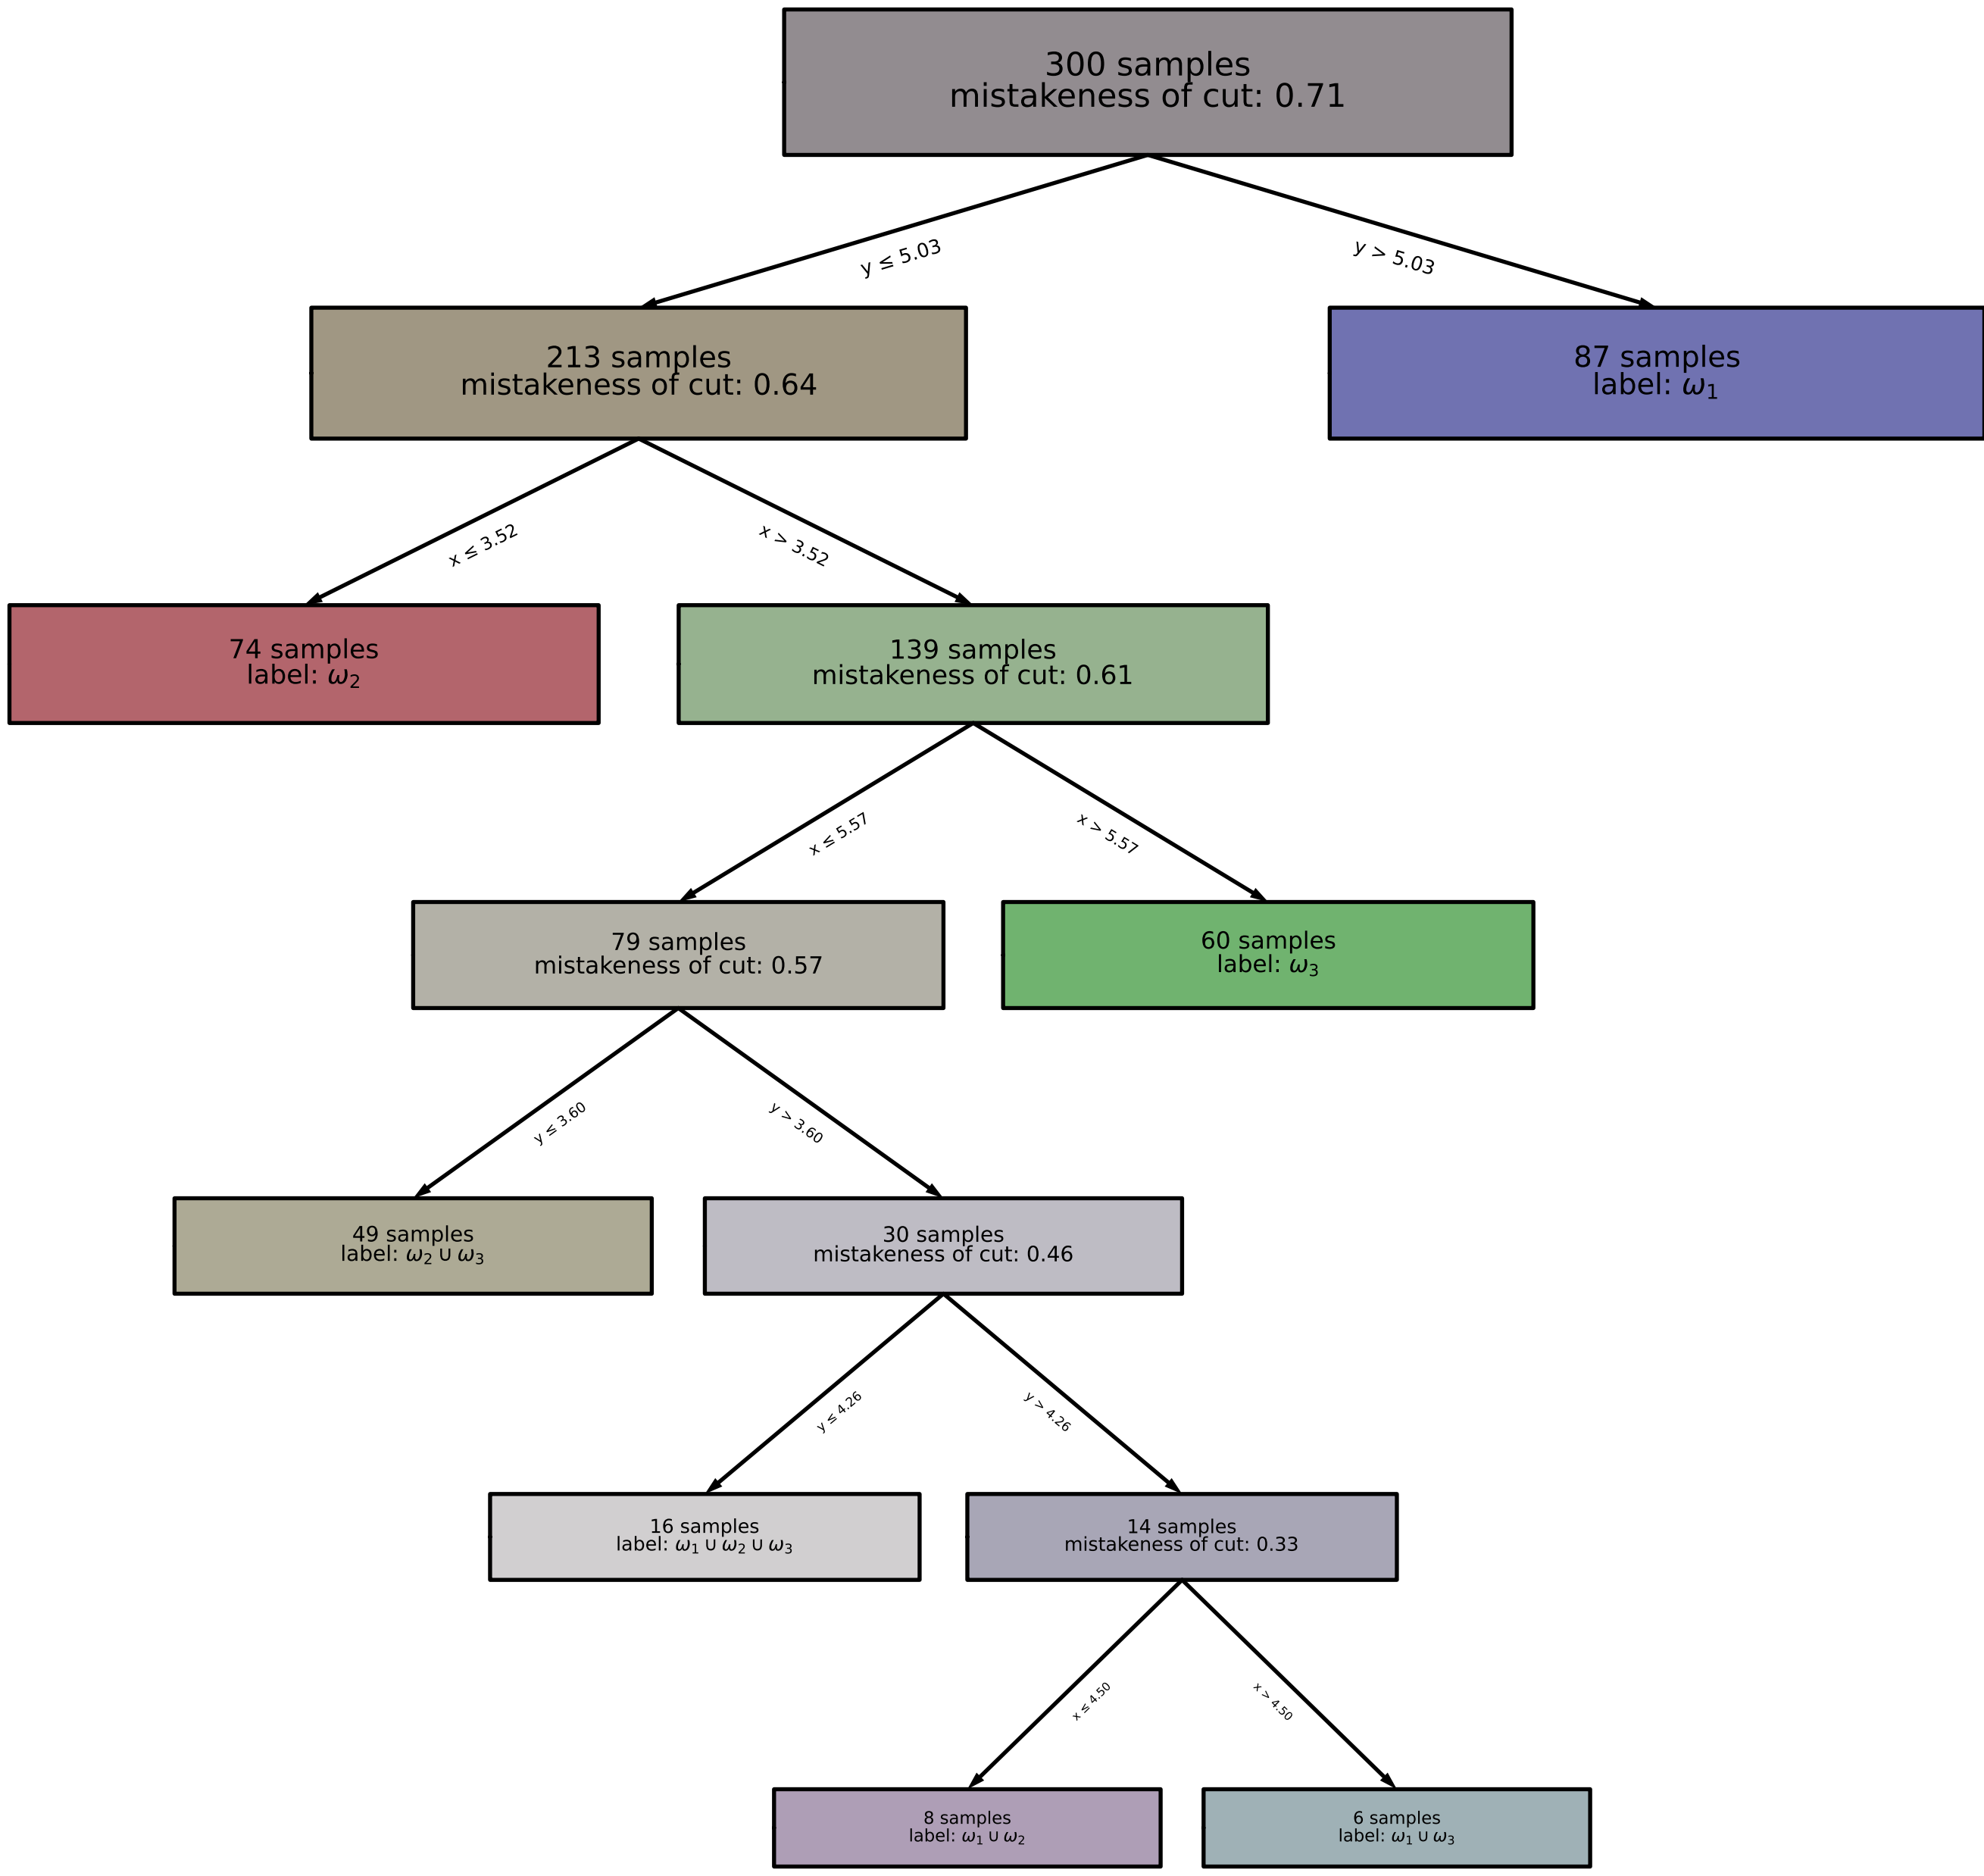

Supplement: supplementary_material [file diagram_0.pdf › iemm/experiments/figs/three_clusters2D_synth/full/diagram_0.pdf]

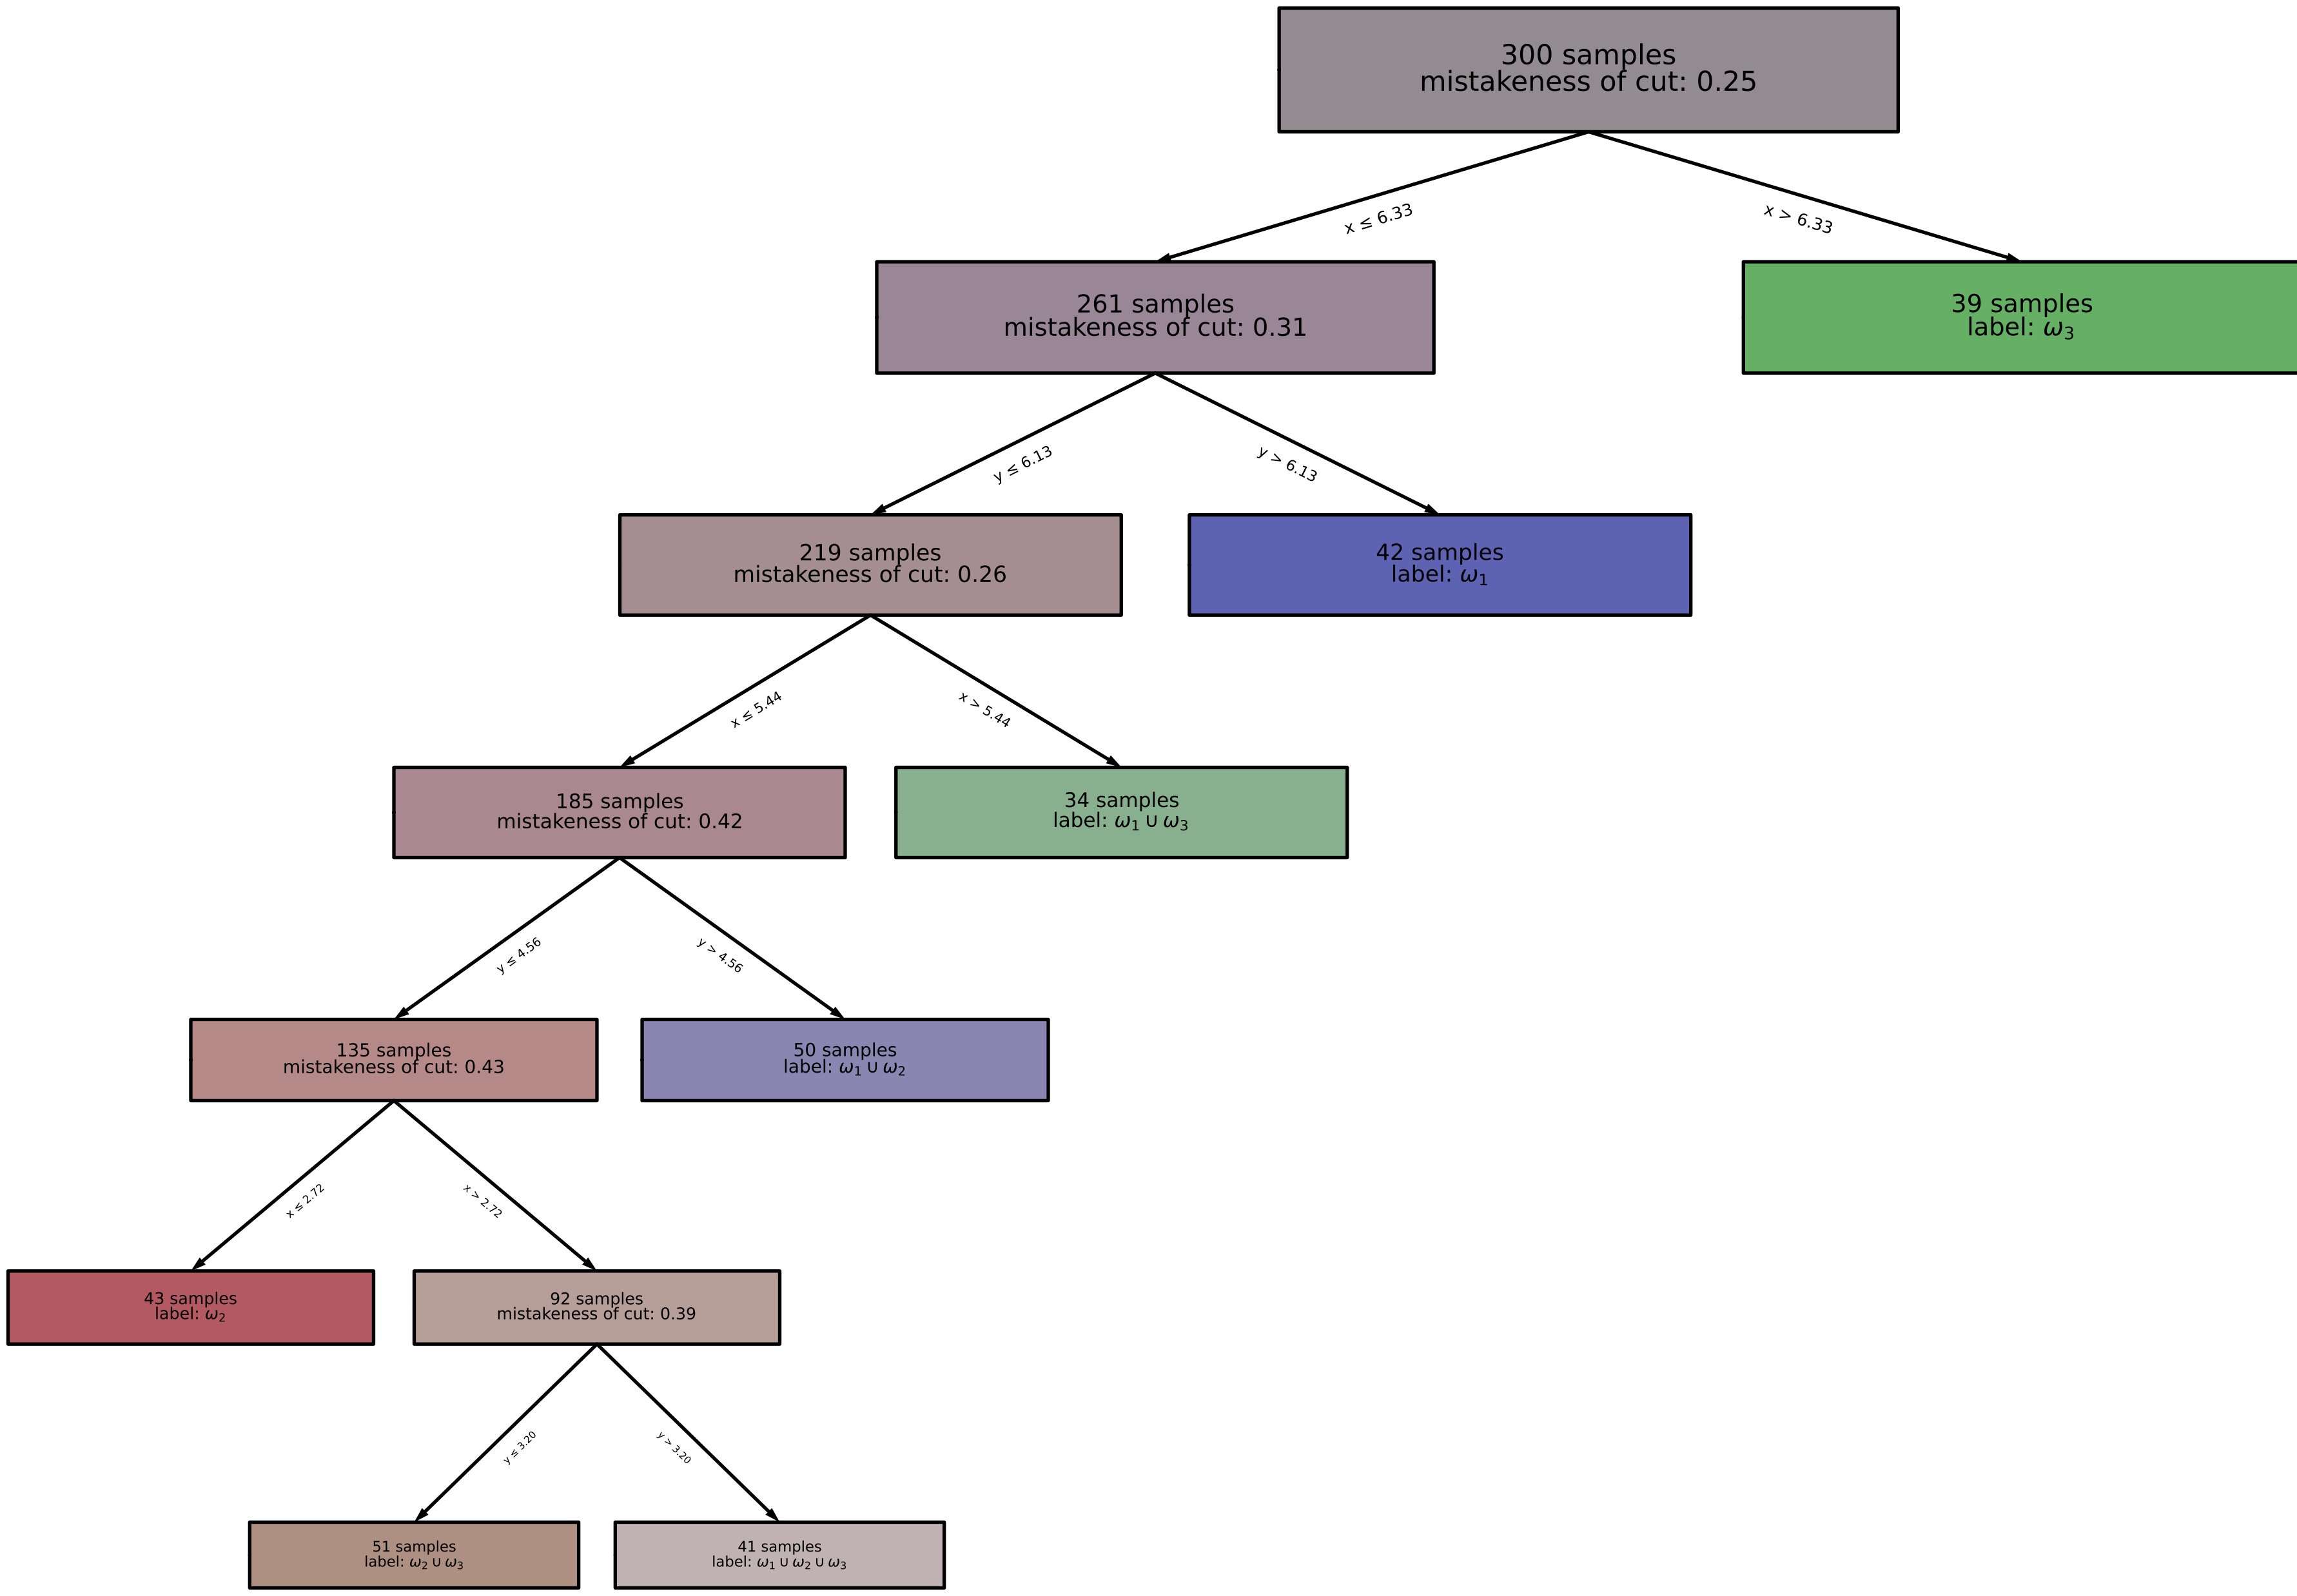

Supplement: supplementary_material [file diagram_1.pdf › iemm/experiments/figs/three_clusters2D_synth/full/diagram_1.pdf]

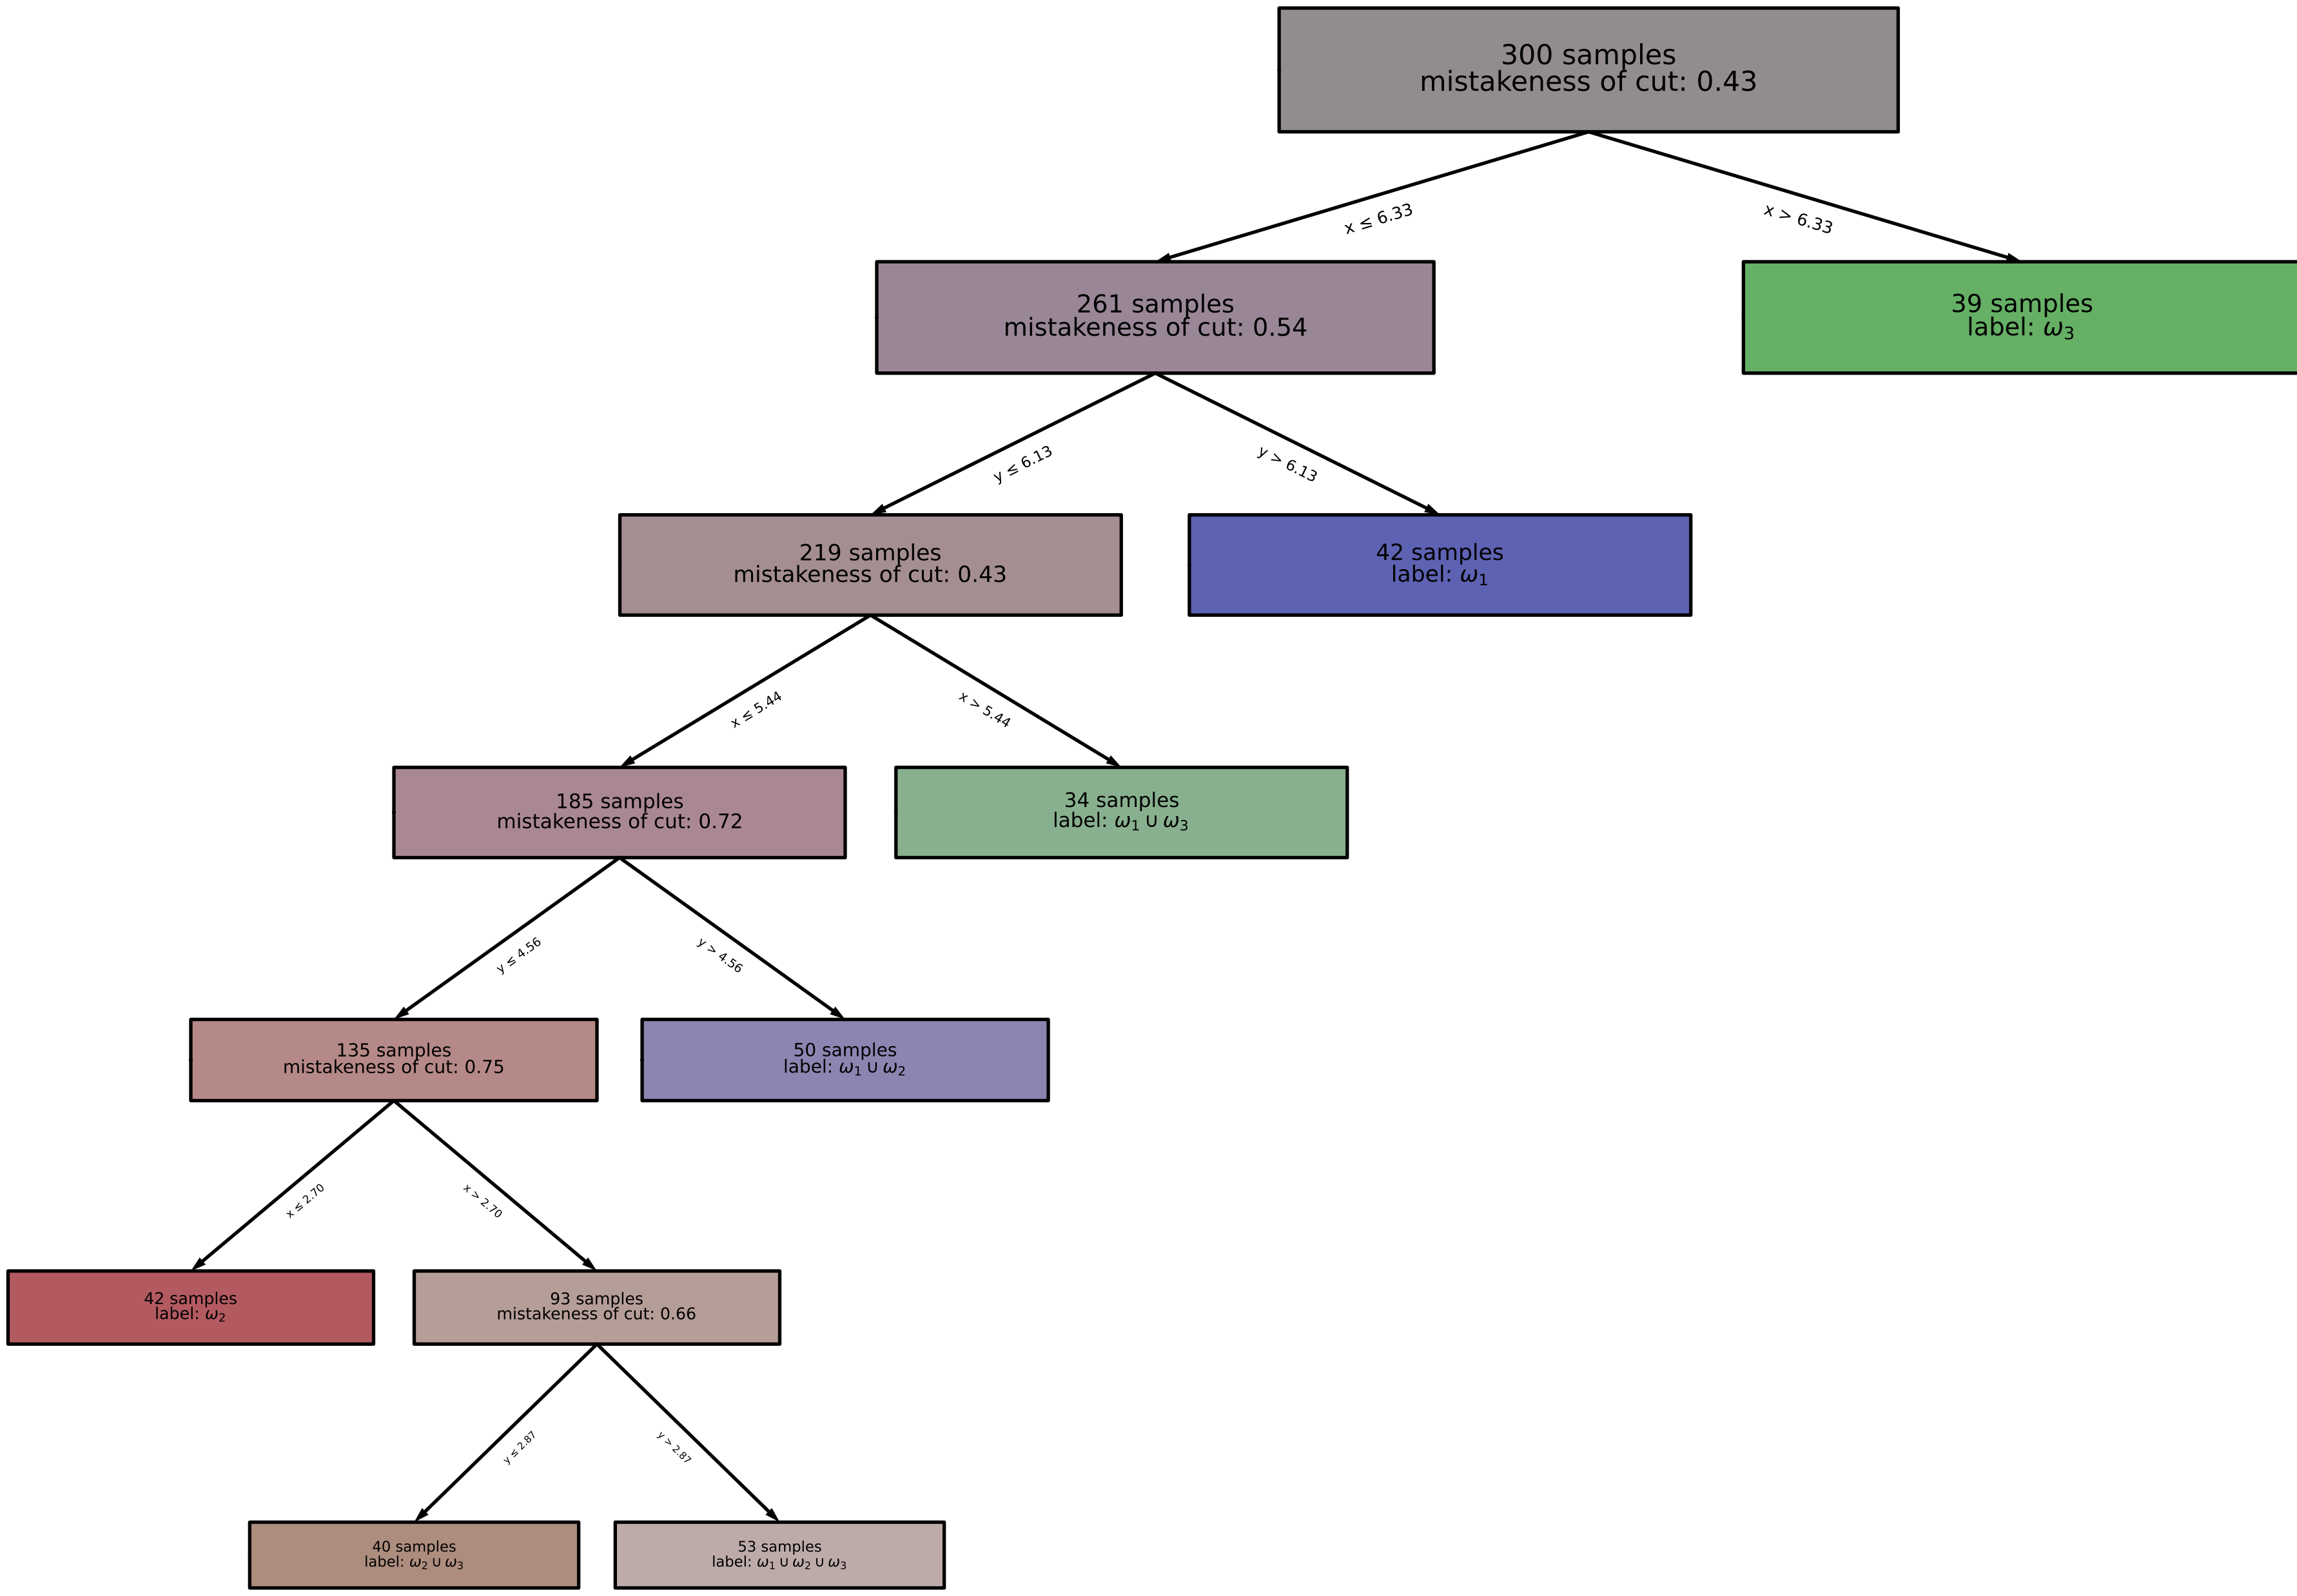

Supplement: supplementary_material [file diagram_inf.pdf › iemm/experiments/figs/three_clusters2D_synth/full/diagram_inf.pdf]

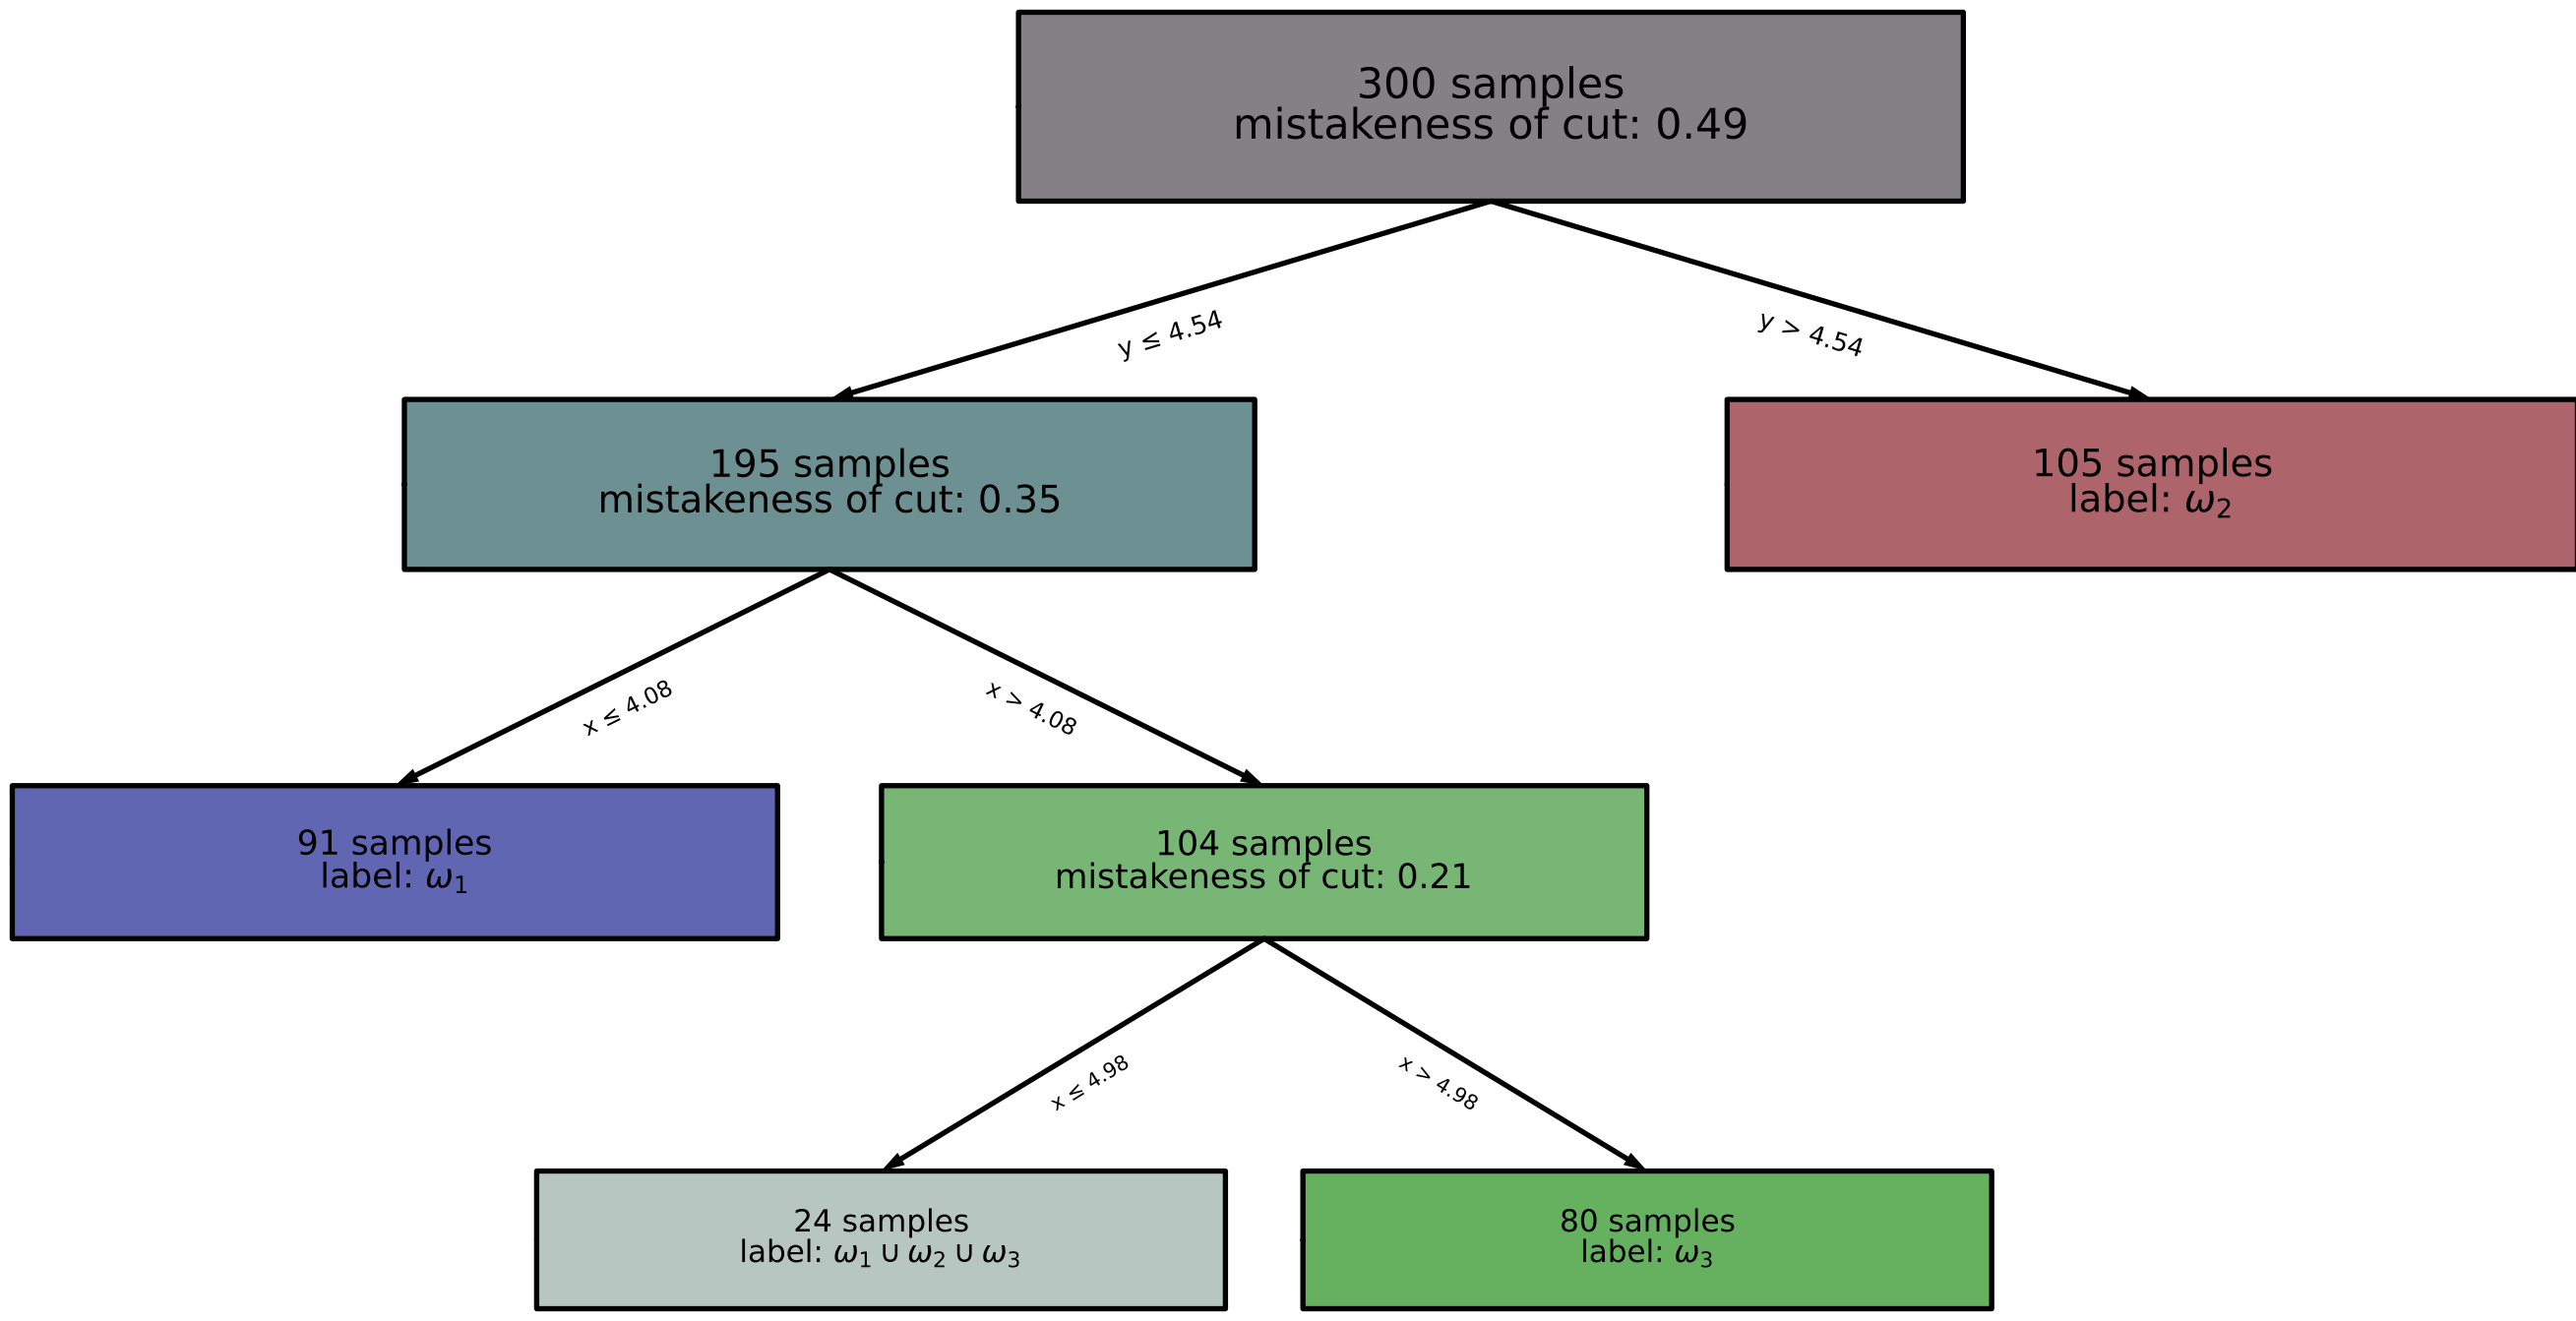

Supplement: supplementary_material [file diagram_-1.pdf › iemm/experiments/figs/three_clusters2D_synth/quasi-bayesian/diagram_-1.pdf]

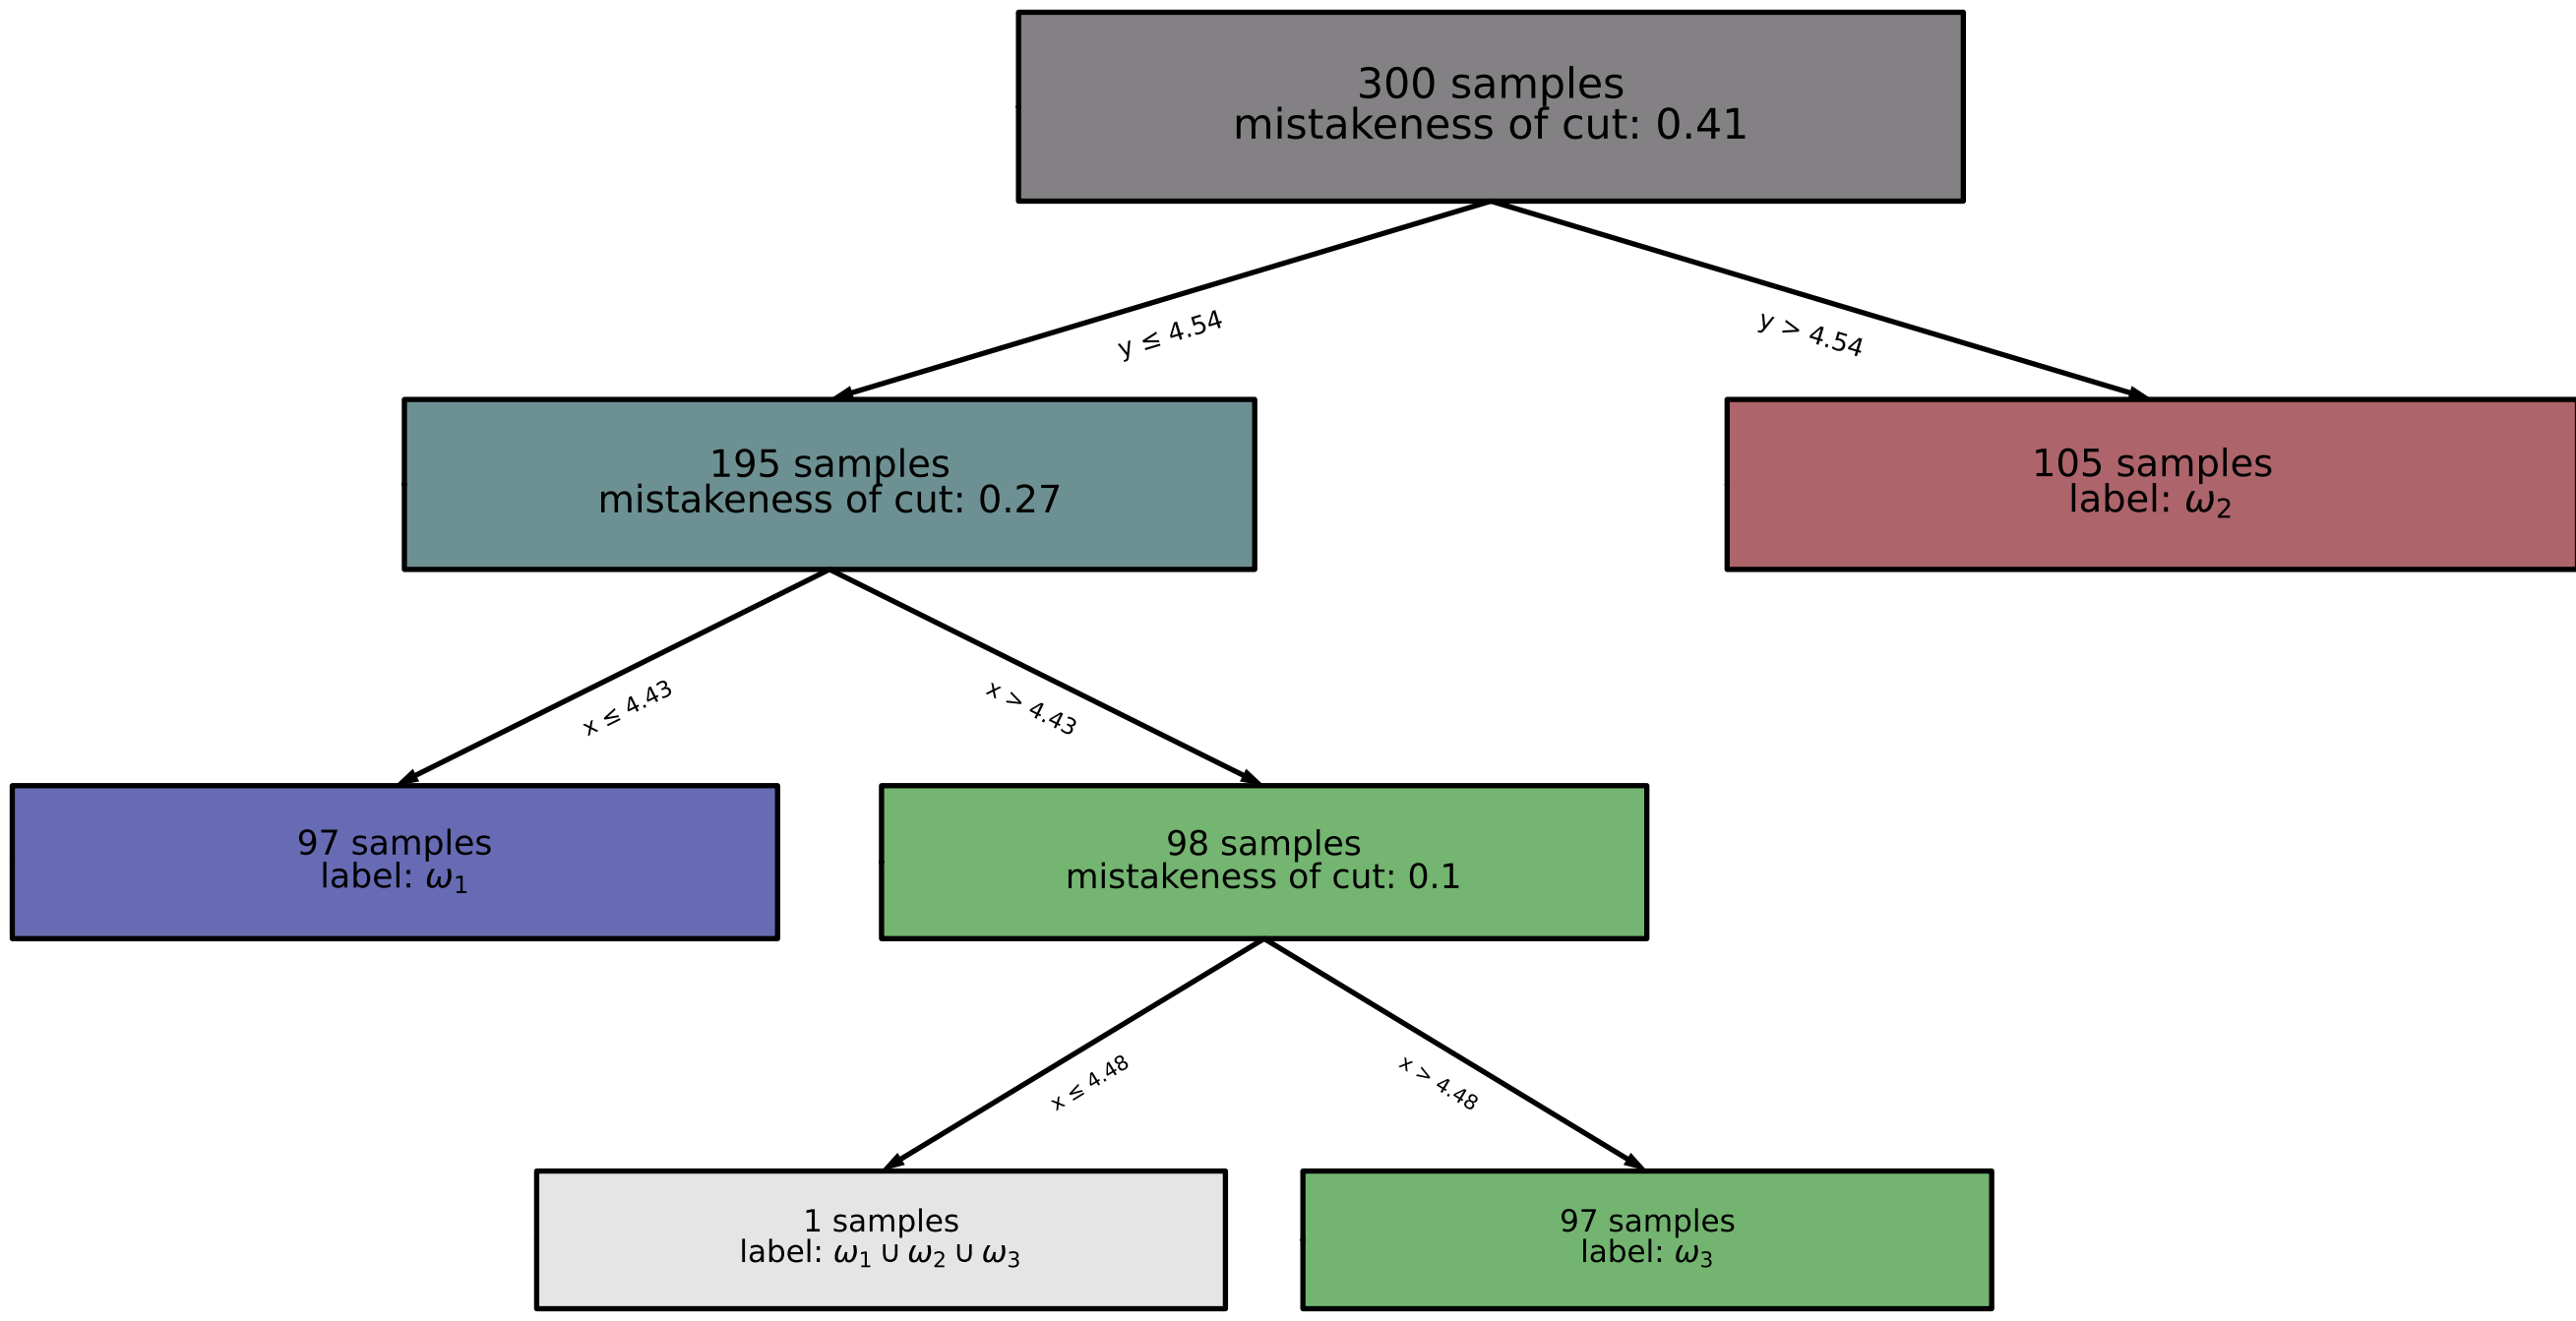

Supplement: supplementary_material [file diagram_-inf.pdf › iemm/experiments/figs/three_clusters2D_synth/quasi-bayesian/diagram_-inf.pdf]

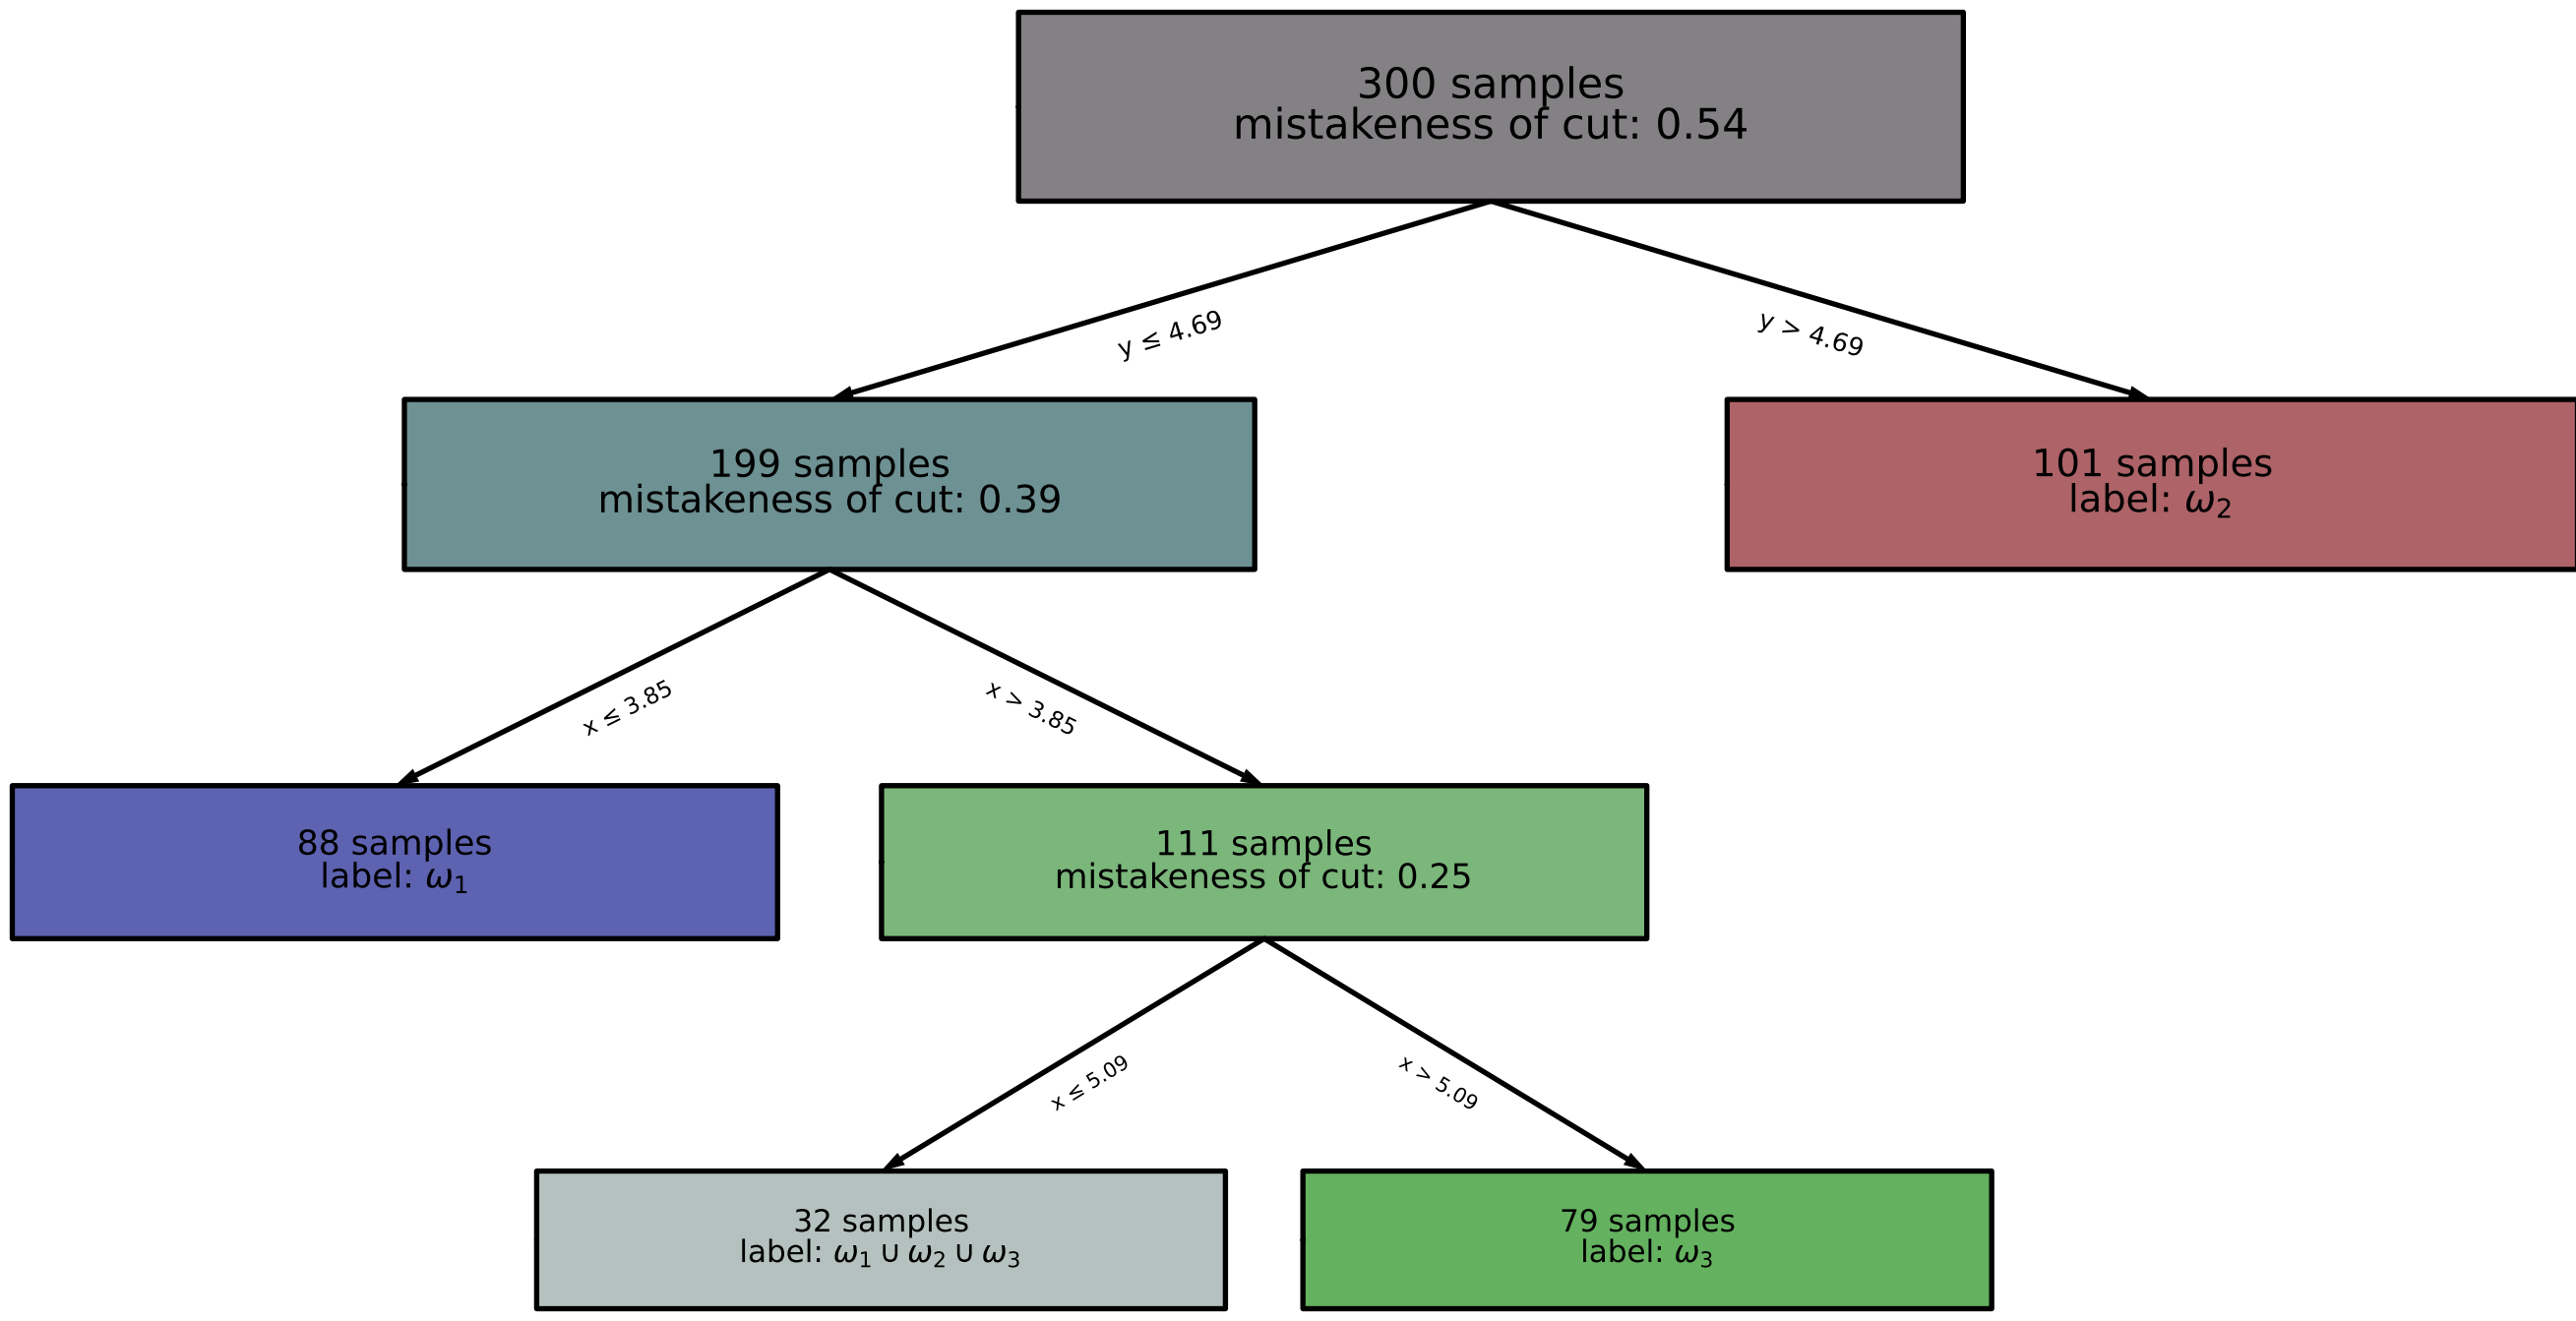

Supplement: supplementary_material [file diagram_0.pdf › iemm/experiments/figs/three_clusters2D_synth/quasi-bayesian/diagram_0.pdf]

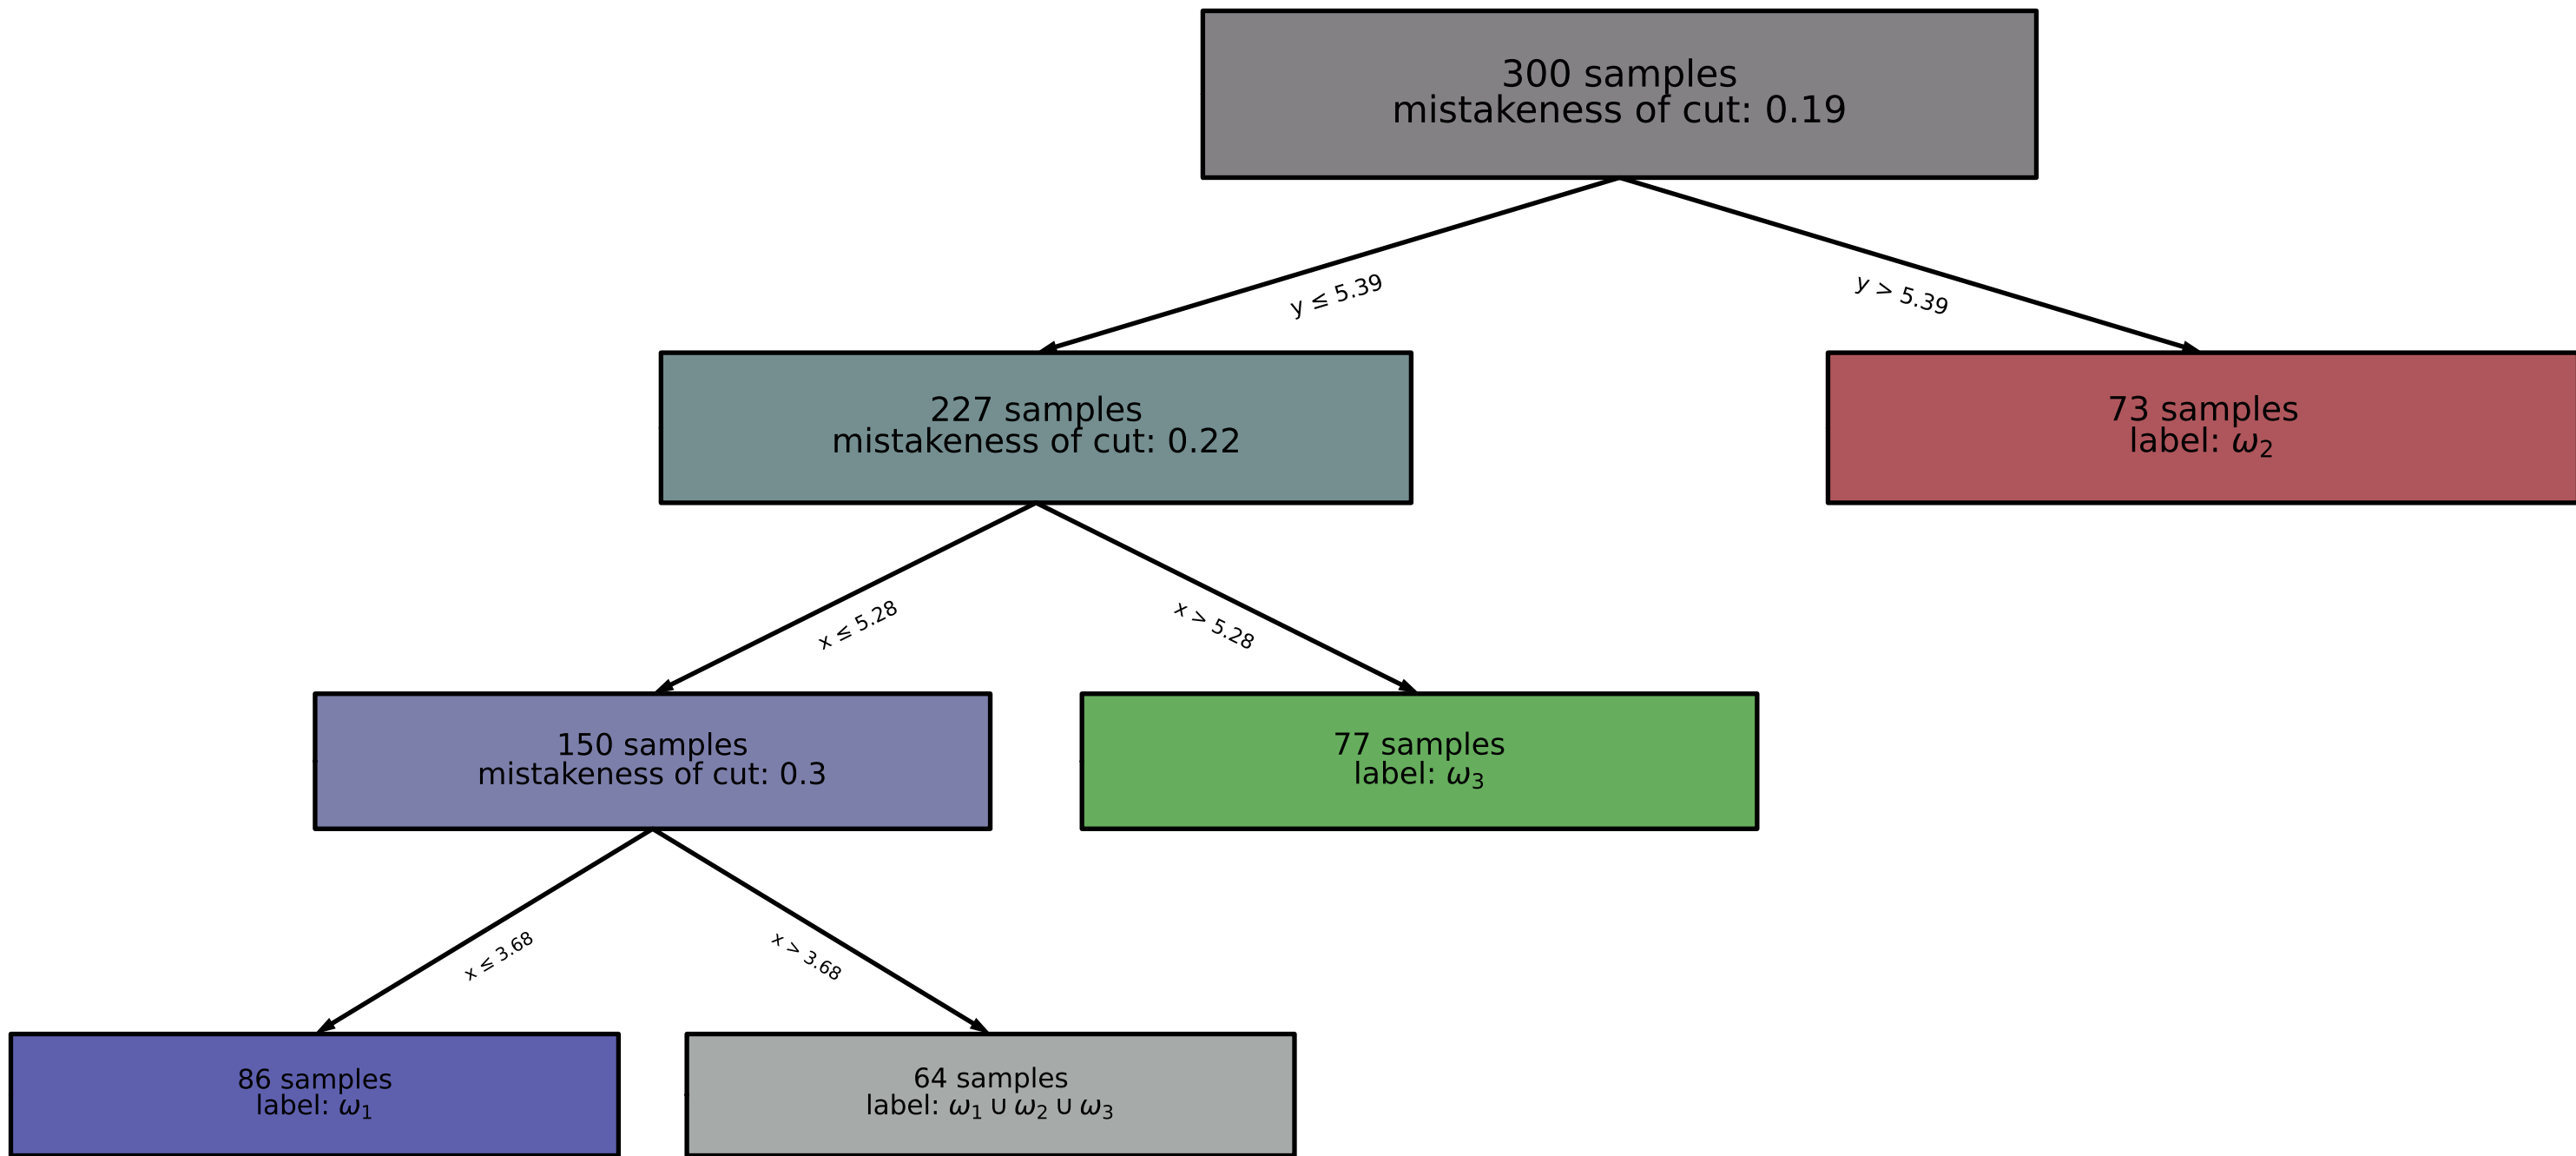

Supplement: supplementary_material [file diagram_1.pdf › iemm/experiments/figs/three_clusters2D_synth/quasi-bayesian/diagram_1.pdf]

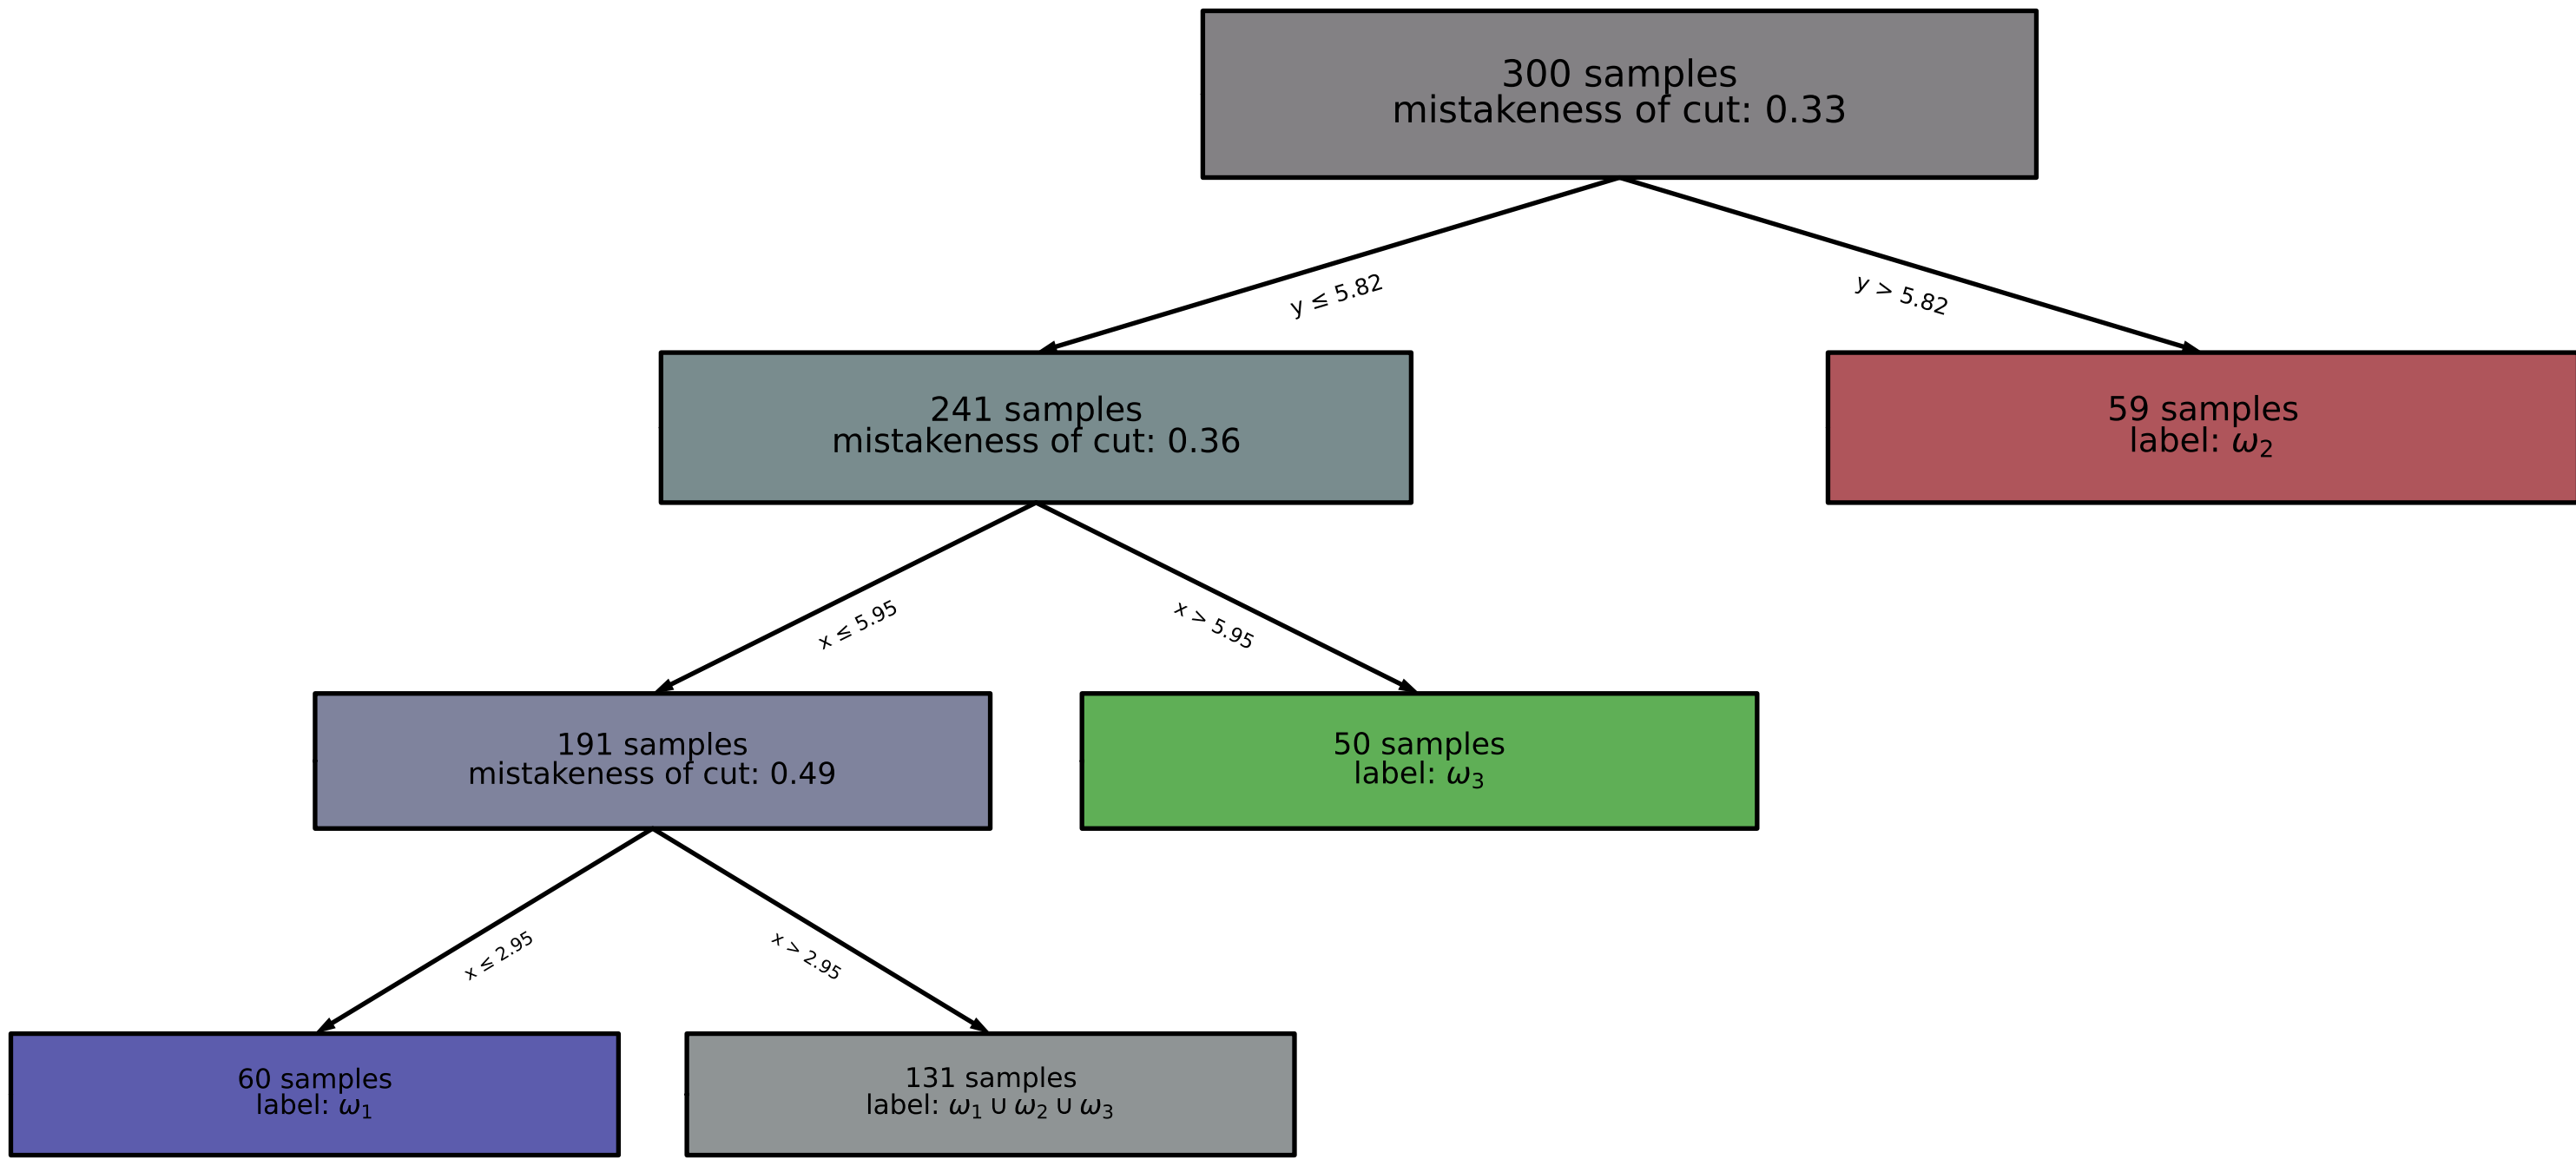

Supplement: supplementary_material [file diagram_inf.pdf › iemm/experiments/figs/three_clusters2D_synth/quasi-bayesian/diagram_inf.pdf]

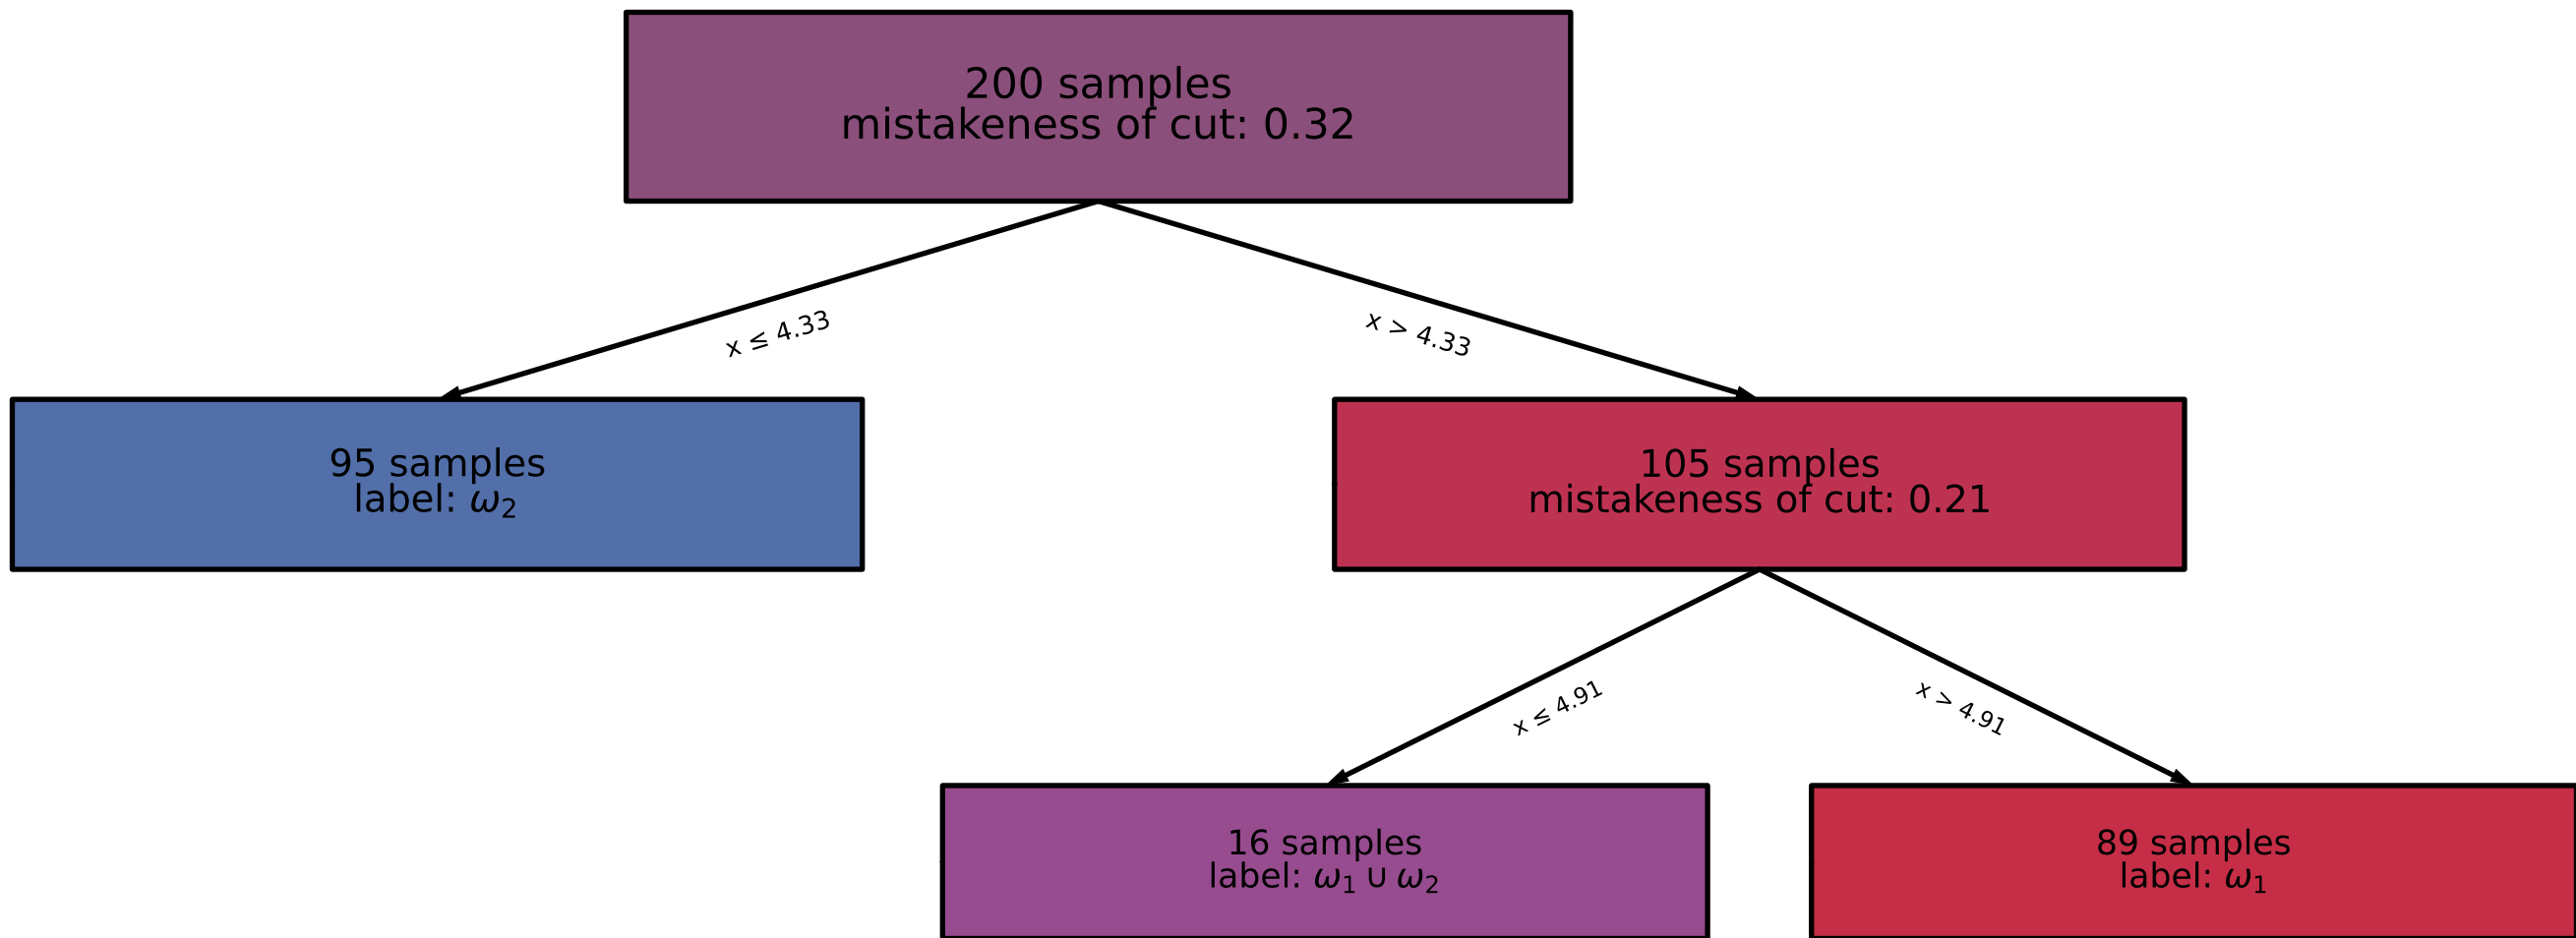

Supplement: supplementary_material [file diagram_-1.pdf › iemm/experiments/figs/two_clusters2D_synth/easy/diagram_-1.pdf]

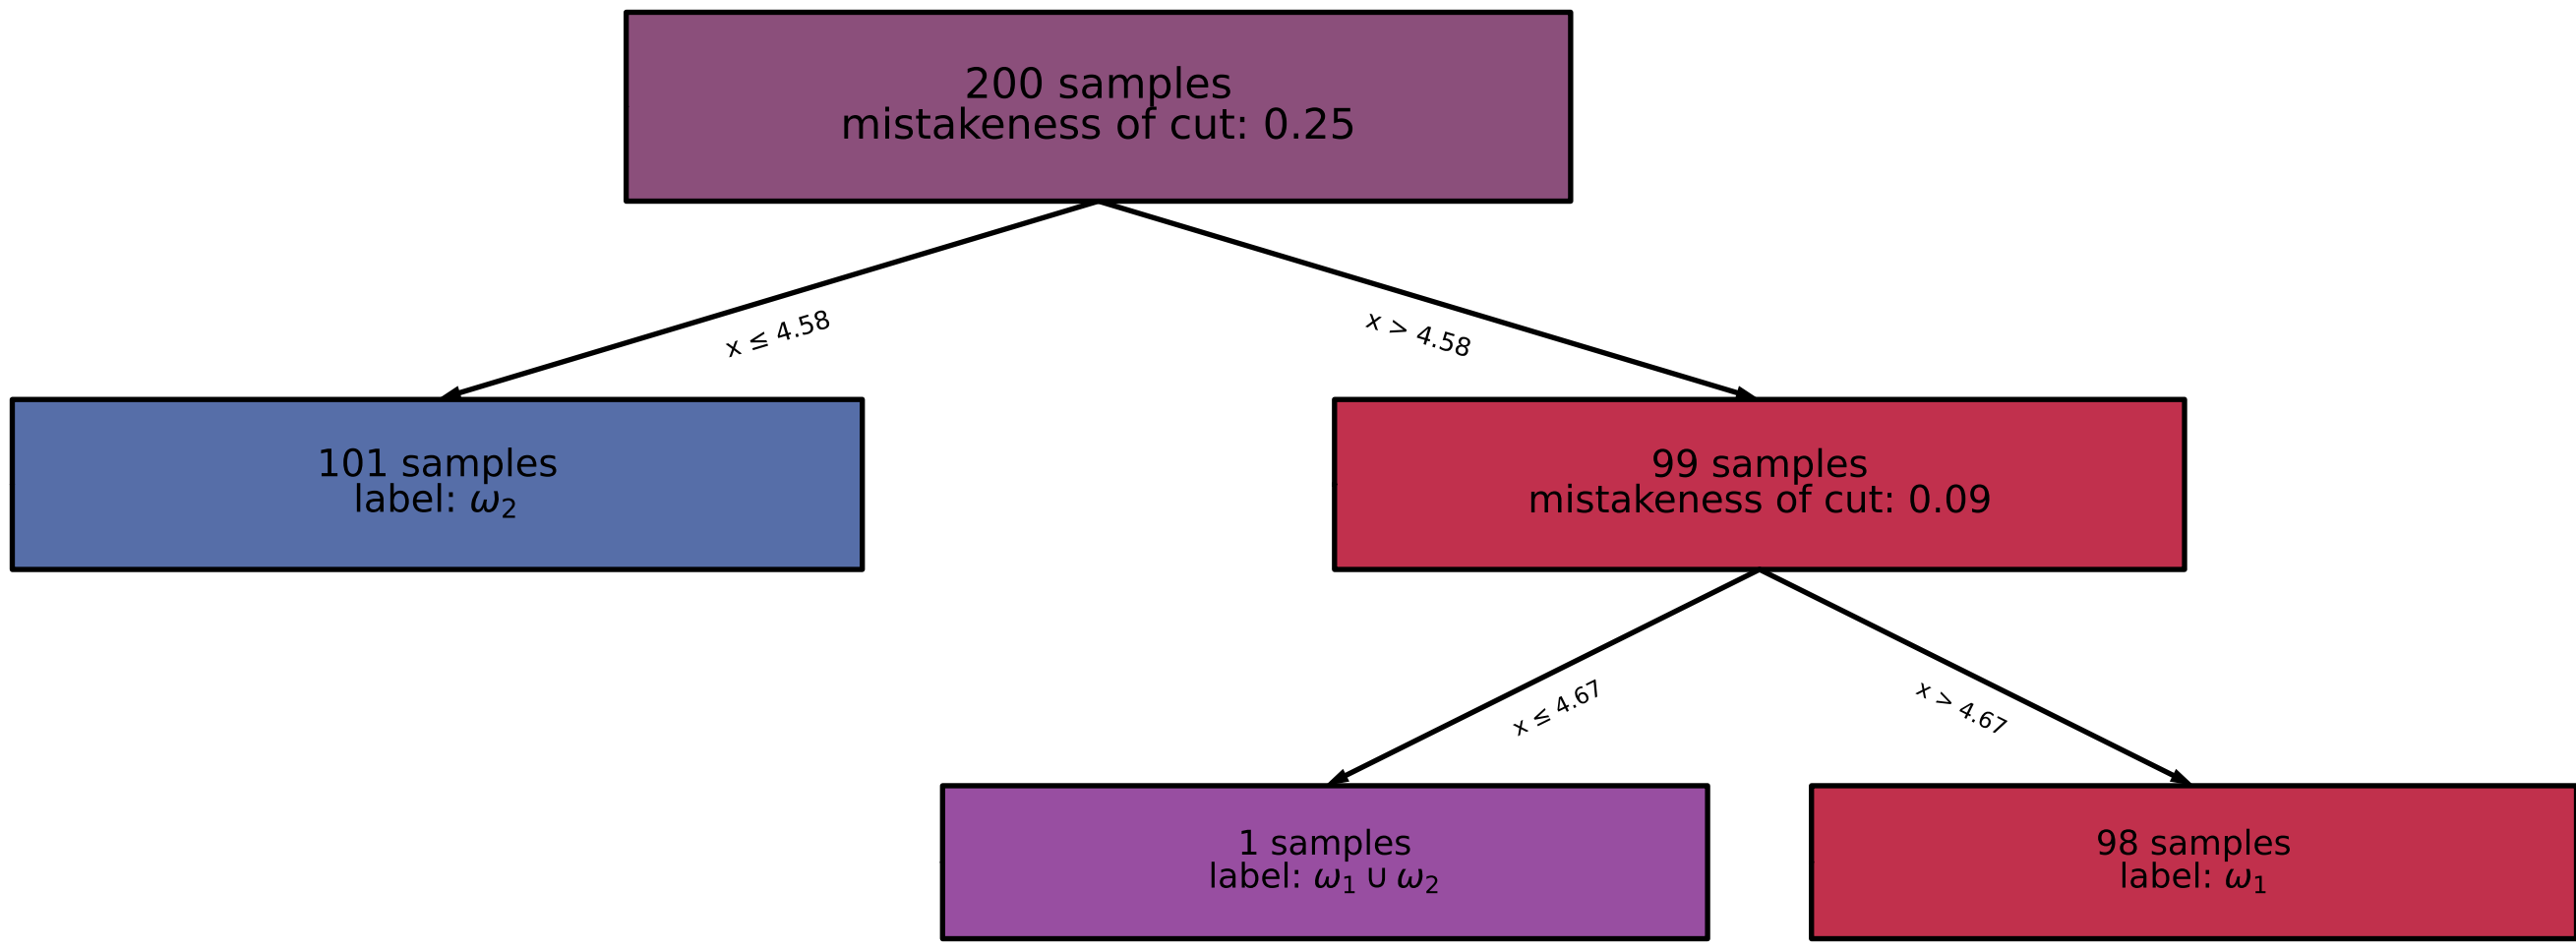

Supplement: supplementary_material [file diagram_-inf.pdf › iemm/experiments/figs/two_clusters2D_synth/easy/diagram_-inf.pdf]

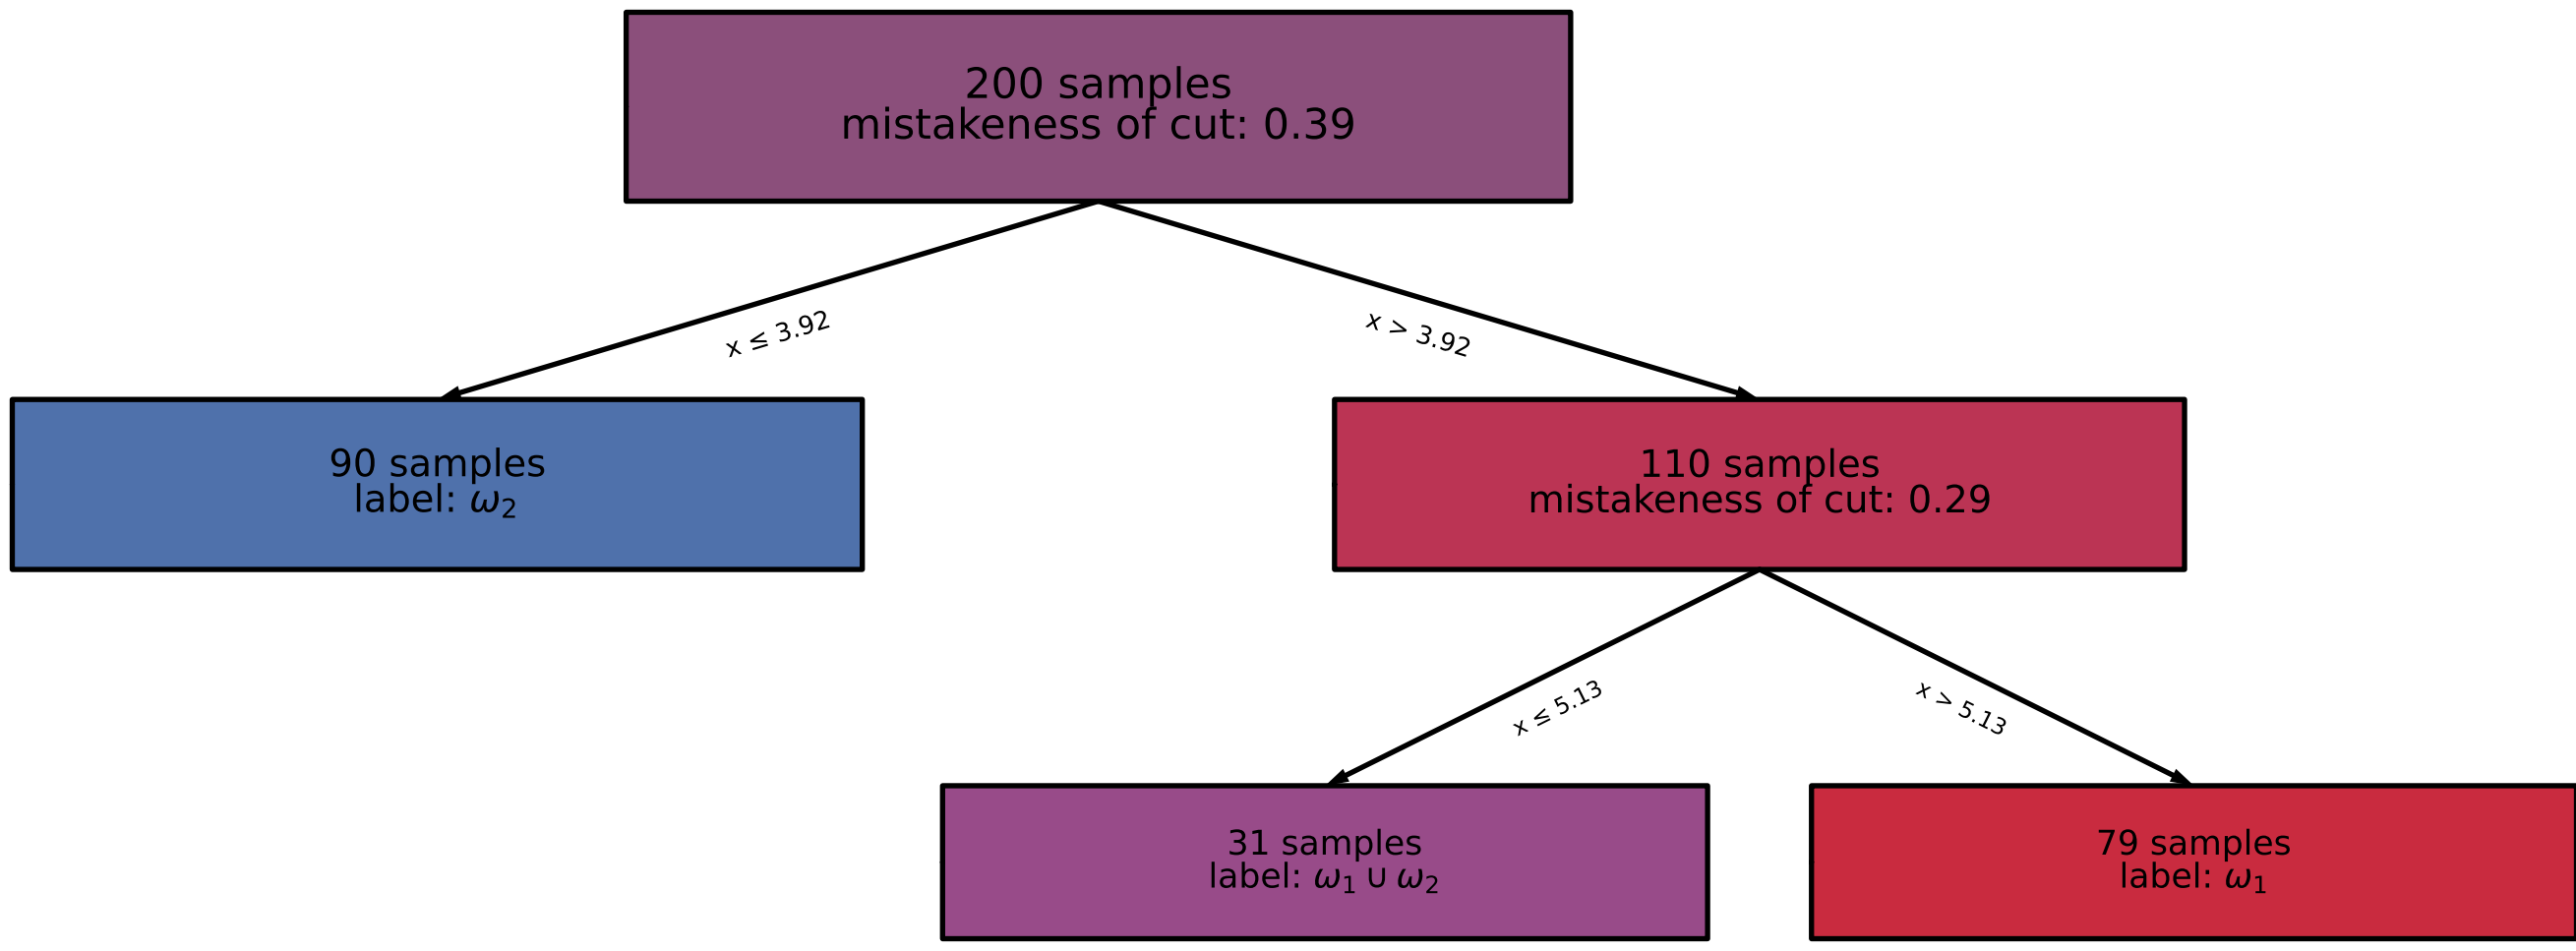

Supplement: supplementary_material [file diagram_0.pdf › iemm/experiments/figs/two_clusters2D_synth/easy/diagram_0.pdf]

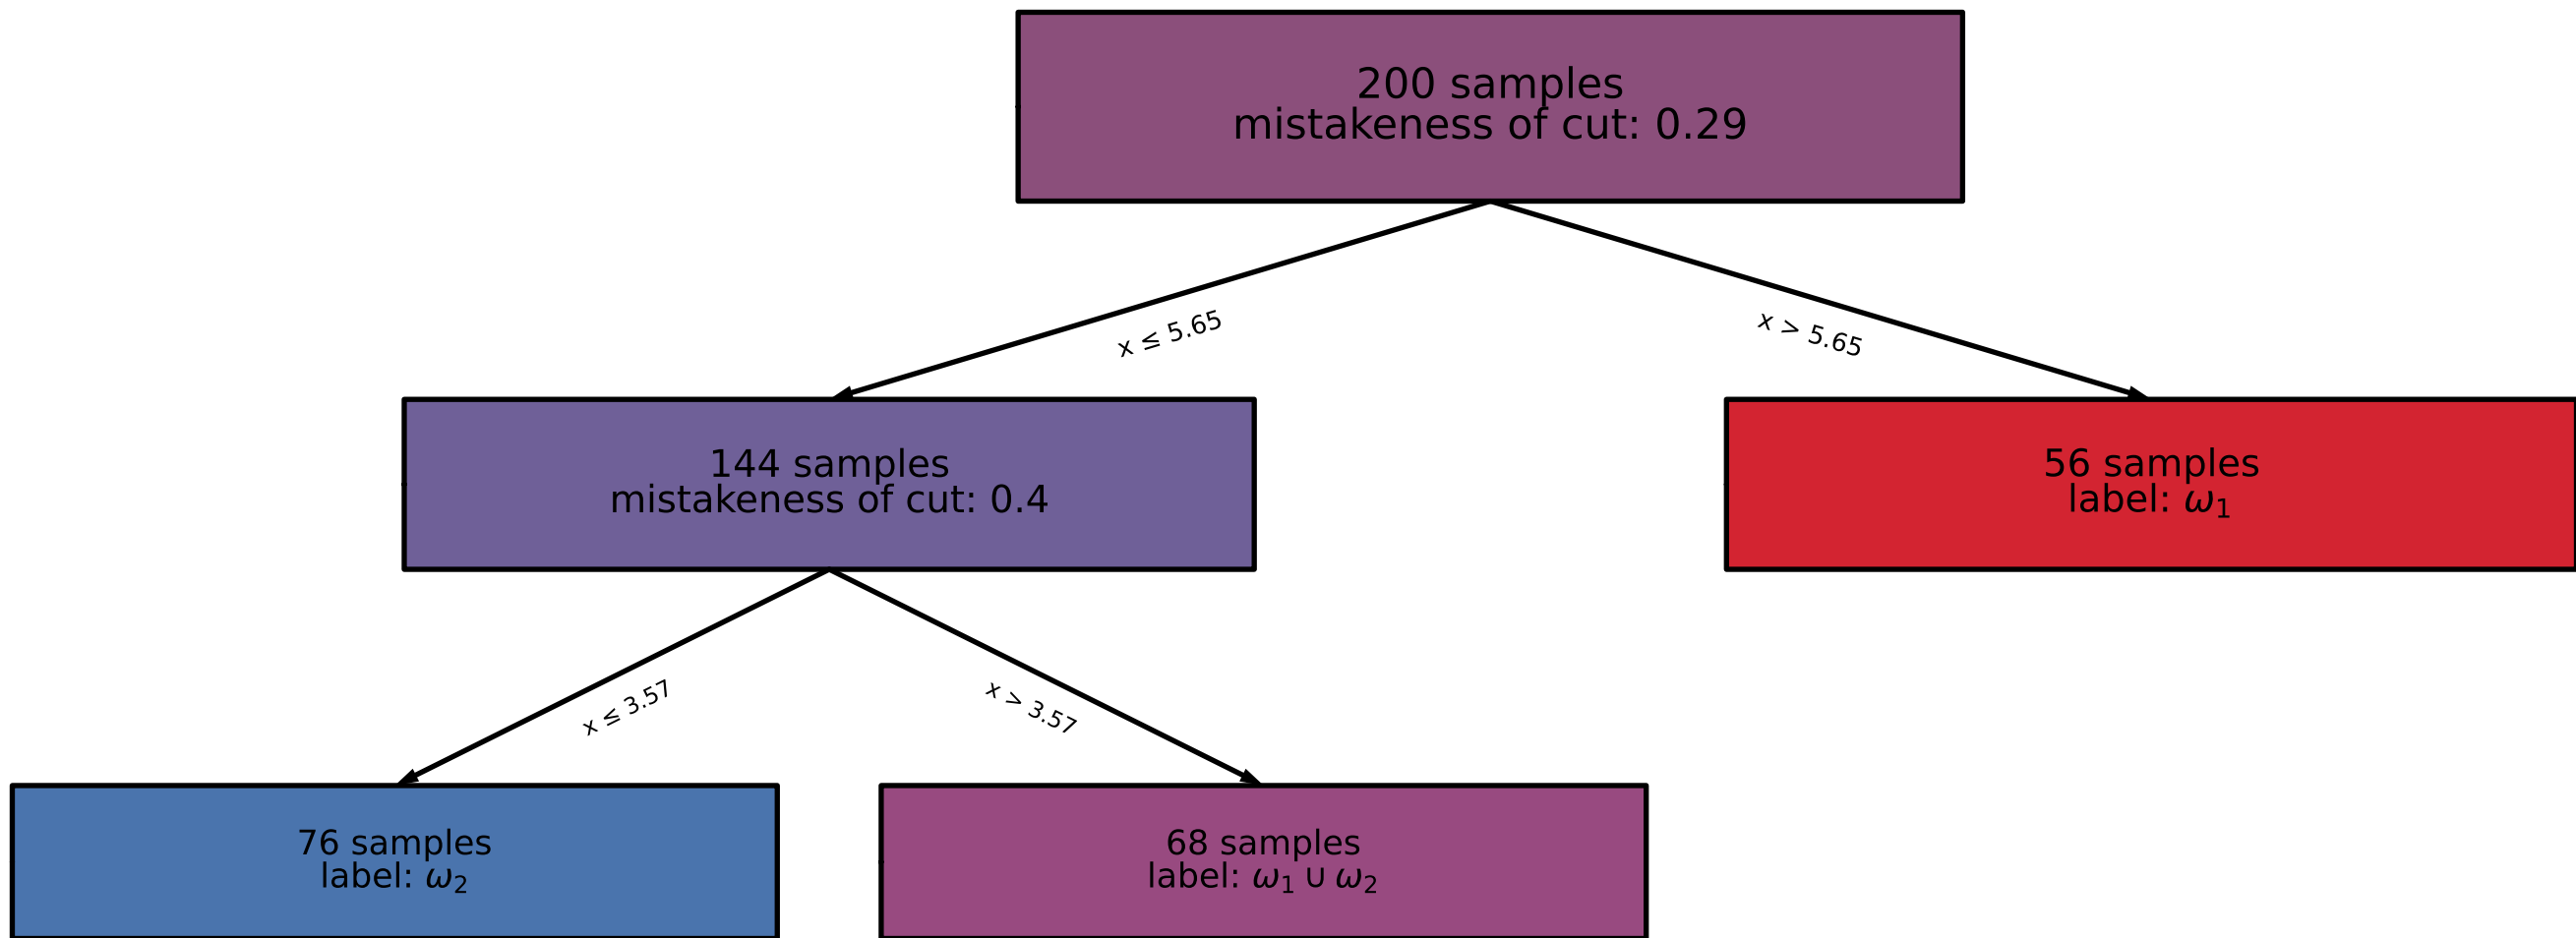

Supplement: supplementary_material [file diagram_1.pdf › iemm/experiments/figs/two_clusters2D_synth/easy/diagram_1.pdf]

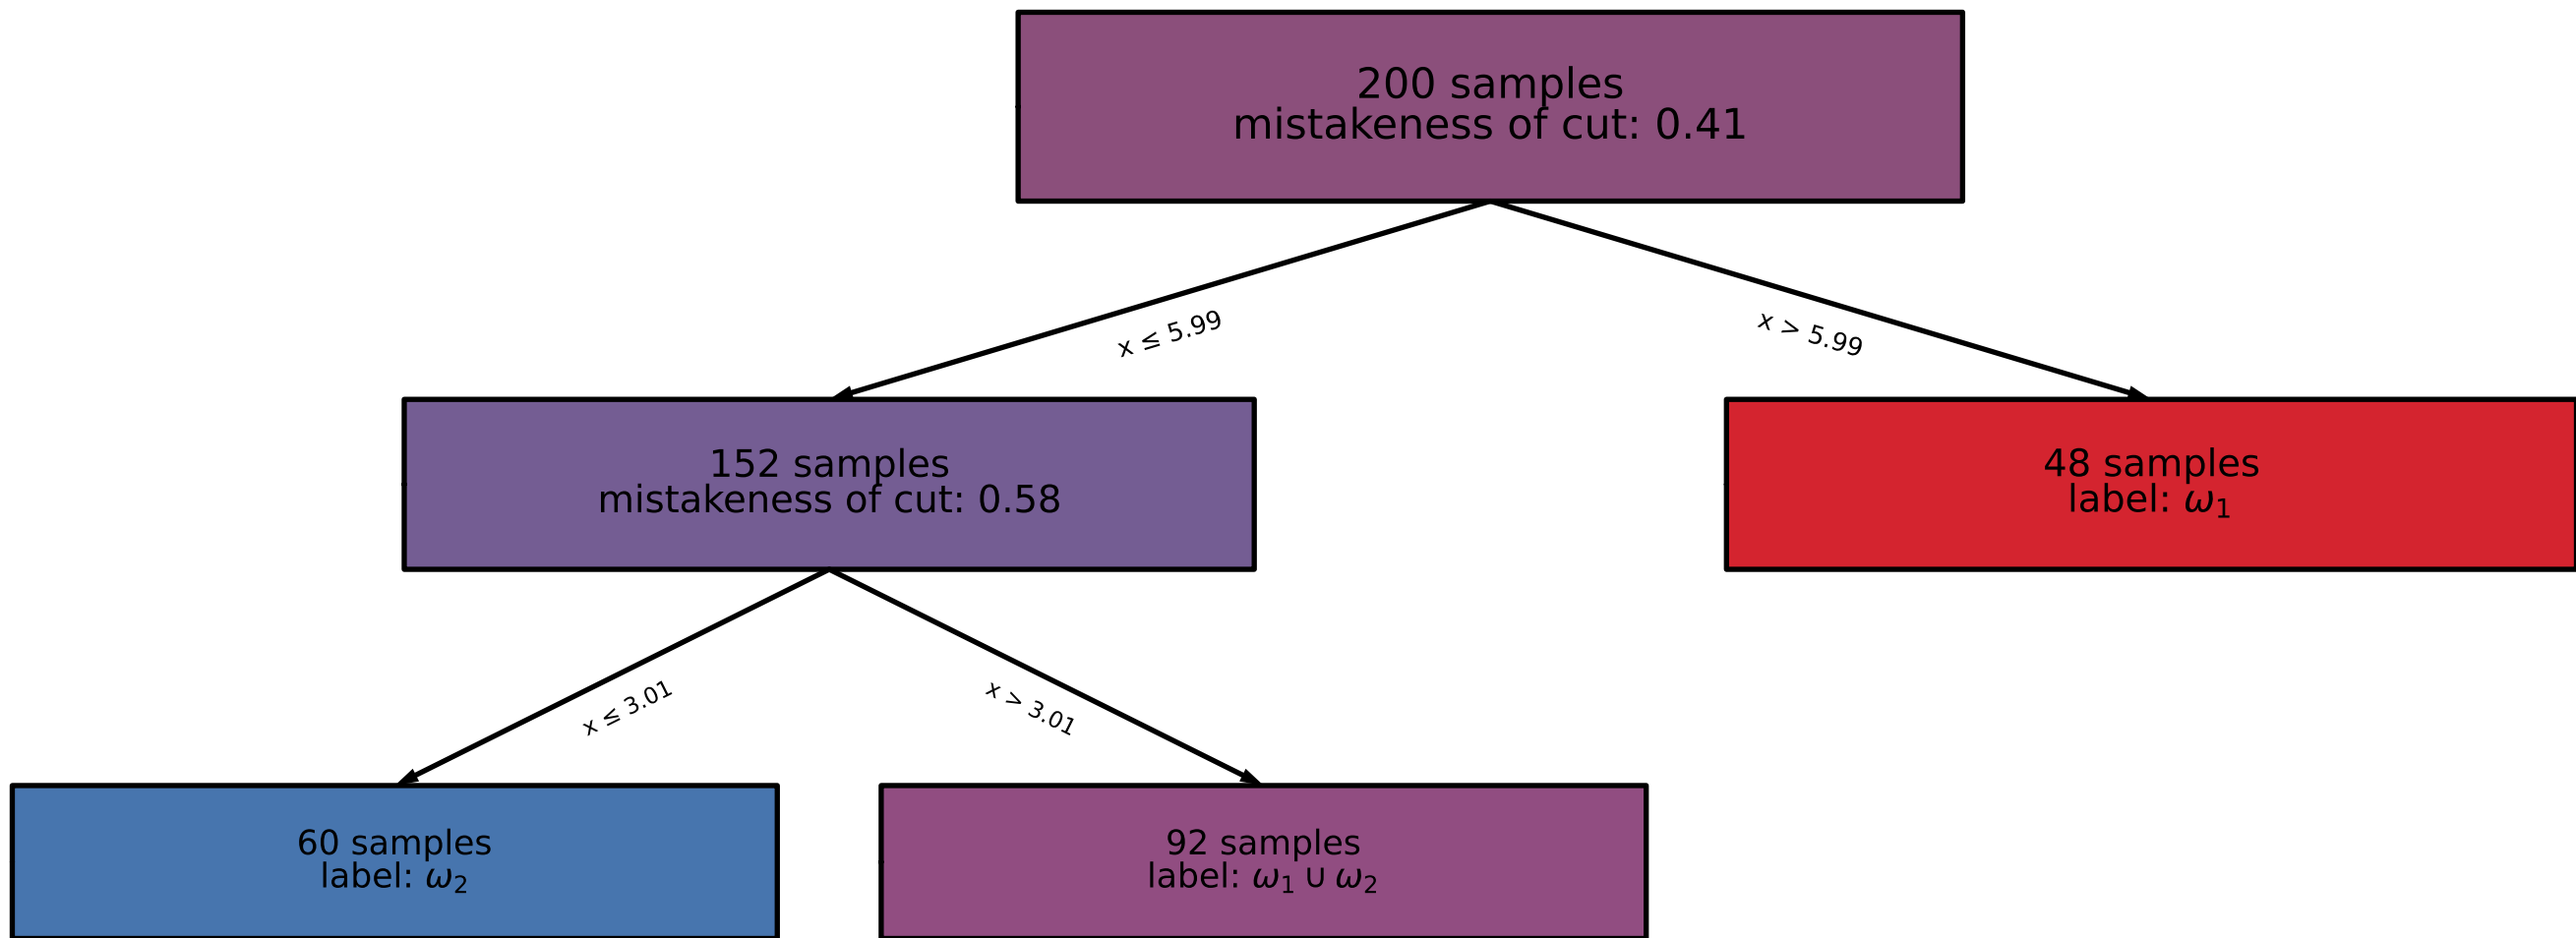

Supplement: supplementary_material [file diagram_inf.pdf › iemm/experiments/figs/two_clusters2D_synth/easy/diagram_inf.pdf]

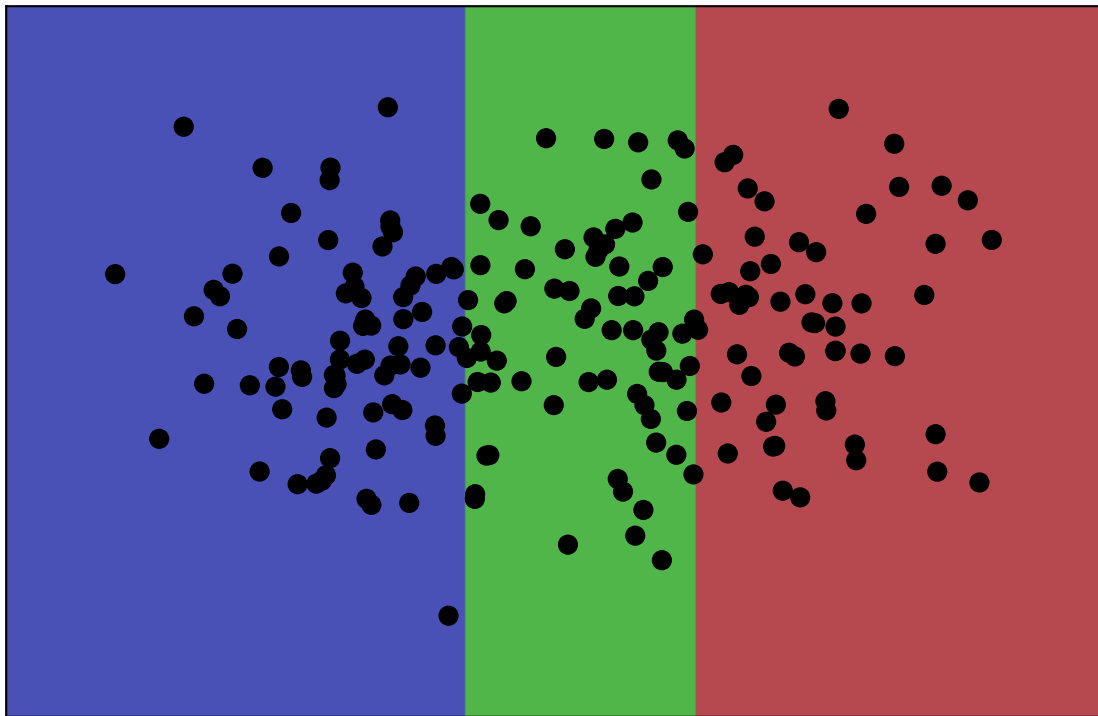

Supplement: supplementary_material [file iemm_decision_boundaries.pdf › iemm/experiments/figures_simple_example/iemm_decision_boundaries.pdf]

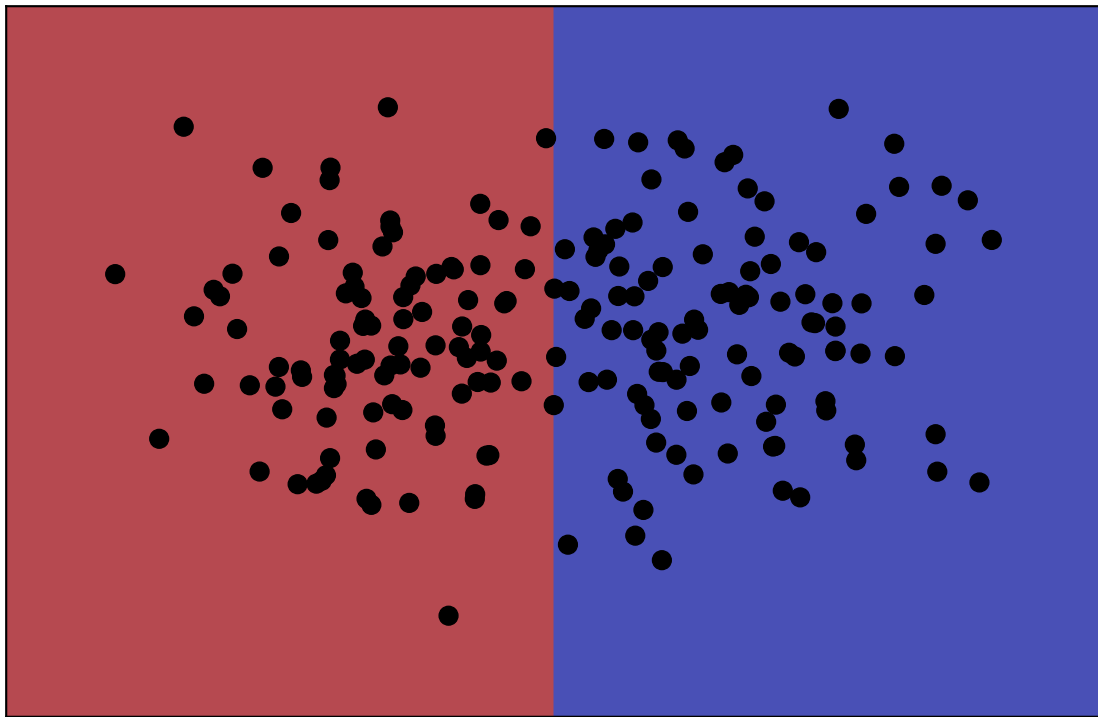

Supplement: supplementary_material [file imm_decision_boundaries.pdf › iemm/experiments/figures_simple_example/imm_decision_boundaries.pdf]

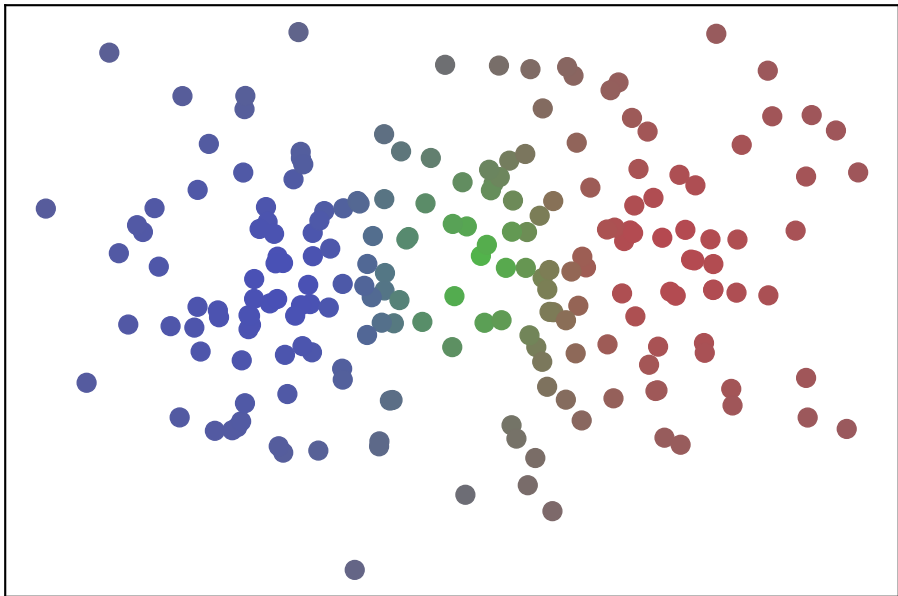

Supplement: supplementary_material [file initial_ev_clustering.pdf › iemm/experiments/figures_simple_example/initial_ev_clustering.pdf]

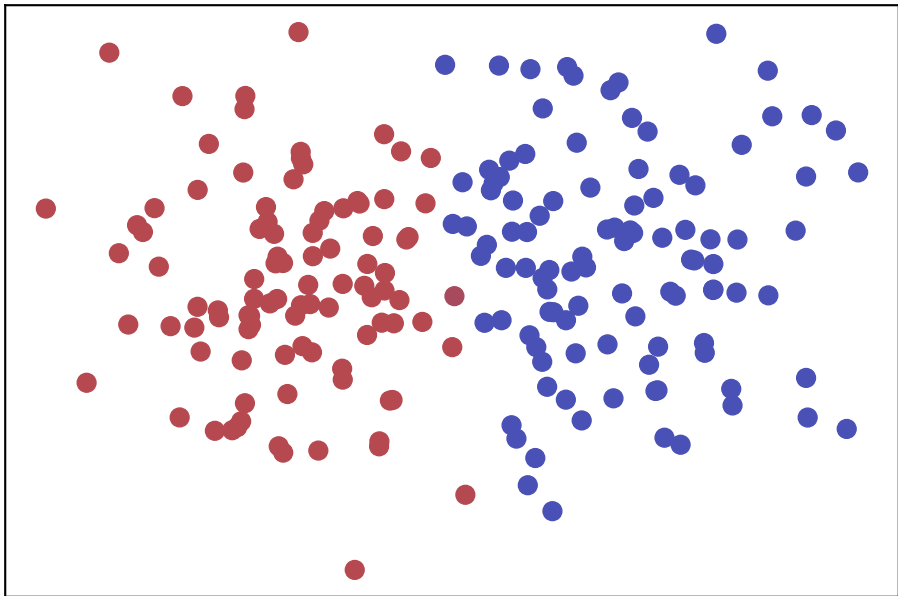

Supplement: supplementary_material [file initial_hard_clustering.pdf › iemm/experiments/figures_simple_example/initial_hard_clustering.pdf]

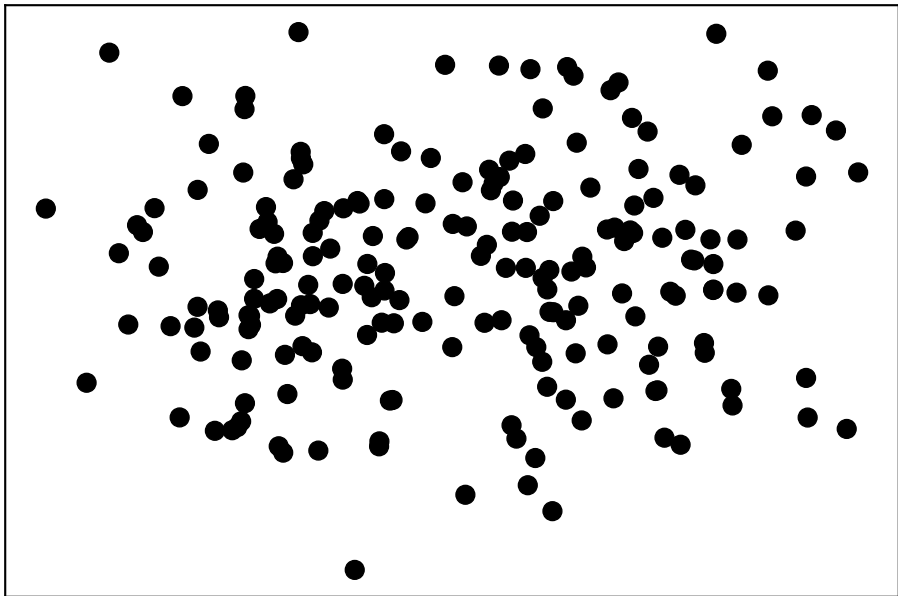

Supplement: supplementary_material [file initial_points.pdf › iemm/experiments/figures_simple_example/initial_points.pdf]
